# Supplementary material for: Multifaceted regulation of hepatic lipid metabolism by YY1
Source: Life Sci Alliance. 2021 Jun 7;4(7):e202000928. doi: 10.26508/lsa.202000928 (PMC8200296; doi:10.26508/lsa.202000928)
Supplement: Supplementary file 2 [file LSA-2020-00928_TableS2.xlsx]

## Sheet: table_s2_DEGs_log2foldchange_0.
Table S2: List of DEGs induced by YY1 knockdown
Ensembl	baseMean	log2FoldChange	lfcSE	stat	pvalue	padj	symbol	entrez	name
ENSG00000187583	10.1873	1.32835	0.235538	5.63961	1.7e-08	1.22e-07	PLEKHN1	84069	pleckstrin homology domain containing N1
ENSG00000162576	222.473	1.3012	0.0753542	17.2678	8.22e-67	2.37e-64	MXRA8	54587	matrix remodeling associated 8
ENSG00000235098	66.165	1.17675	0.158894	7.40586	1.3e-13	1.67e-12	ANKRD65	441869	ankyrin repeat domain 65
ENSG00000160075	277.005	0.765676	0.0753077	10.1673	2.77e-24	8.43e-23	SSU72	29101	SSU72 homolog, RNA polymerase II CTD phosphatase
ENSG00000189339	63.2277	0.829676	0.112375	7.38307	1.55e-13	1.97e-12	SLC35E2B	728661	solute carrier family 35 member E2B
ENSG00000178821	8.29944	-1.19233	0.28761	-4.14566	3.39e-05	0.000143722	TMEM52	339456	transmembrane protein 52
ENSG00000149527	4.53508	3.37604	0.458703	7.35997	1.84e-13	2.32e-12	PLCH2	9651	phospholipase C eta 2
ENSG00000197921	3.4881	3.51042	0.541148	6.48698	8.76e-11	8.35e-10	HES5	388585	hes family bHLH transcription factor 5
ENSG00000177133	1.77397	2.44485	0.604311	4.04569	5.22e-05	0.000214241	PRDM16-DT	440556	PRDM16 divergent transcript
ENSG00000078900	3.56245	1.75241	0.414786	4.22486	2.39e-05	0.00010424	TP73	7161	tumor protein p73
ENSG00000236423	15.9641	2.82286	0.216752	13.0234	9e-39	6.25e-37	LINC01134	100133612	long intergenic non-protein coding RNA 1134
ENSG00000171680	9.53401	1.6777	0.238649	7.02998	2.07e-12	2.33e-11	PLEKHG5	57449	pleckstrin homology and RhoGEF domain containing G5
ENSG00000173662	5.72146	1.26456	0.304906	4.14738	3.36e-05	0.000142791	TAS1R1	80835	taste 1 receptor member 1
ENSG00000041988	59.4228	0.893614	0.105534	8.46753	2.51e-17	4.5e-16	THAP3	90326	THAP domain containing 3
ENSG00000049246	6.57538	-1.7245	0.348557	-4.94754	7.52e-07	4.23e-06	PER3	8863	period circadian regulator 3
ENSG00000142599	454.17	0.8331	0.0699593	11.9084	1.07e-32	5.08e-31	RERE	473	arginine-glutamic acid dipeptide repeats
ENSG00000171621	8.58659	1.10142	0.309684	3.55659	0.000375702	0.0012864	SPSB1	80176	splA/ryanodine receptor domain and SOCS box containing 1
ENSG00000171612	92.893	-1.109	0.110154	-10.0677	7.67e-24	2.27e-22	SLC25A33	84275	solute carrier family 25 member 33
ENSG00000130940	30.5015	0.861098	0.152619	5.64213	1.68e-08	1.21e-07	CASZ1	54897	castor zinc finger 1
ENSG00000116661	648.414	1.67714	0.133521	12.5608	3.47e-36	2.06e-34	FBXO2	26232	F-box protein 2
ENSG00000132879	5.50375	1.09944	0.307499	3.57544	0.000349634	0.00120754	FBXO44	93611	F-box protein 44
ENSG00000011021	21.0458	-1.33079	0.202057	-6.58622	4.51e-11	4.44e-10	CLCN6	1185	chloride voltage-gated channel 6
ENSG00000028137	12.7986	6.23833	0.612791	10.1802	2.43e-24	7.43e-23	TNFRSF1B	7133	TNF receptor superfamily member 1B
ENSG00000142634	116.795	0.977766	0.099743	9.80286	1.09e-22	3e-21	EFHD2	79180	EF-hand domain family member D2
ENSG00000162458	100.854	2.01453	0.0975411	20.6532	9.14e-95	6.4e-92	FBLIM1	54751	filamin binding LIM protein 1
ENSG00000040487	31.7619	0.91875	0.135025	6.8043	1.02e-11	1.07e-10	SLC66A1	54896	solute carrier family 66 member 1
ENSG00000158747	45.2305	1.04681	0.159476	6.56403	5.24e-11	5.12e-10	NBL1	4681	NBL1, DAN family BMP antagonist
ENSG00000188257	406.29	4.56279	0.354288	12.8788	5.93e-38	4e-36	PLA2G2A	5320	phospholipase A2 group IIA
ENSG00000162543	4.31626	3.68226	0.497793	7.39716	1.39e-13	1.78e-12	UBXN10	127733	UBX domain protein 10
ENSG00000162545	875.663	1.2409	0.0922138	13.4568	2.81e-41	2.33e-39	CAMK2N1	55450	calcium/calmodulin dependent protein kinase II inhibitor 1
ENSG00000158828	67.1637	1.12068	0.109705	10.2154	1.69e-24	5.27e-23	PINK1	65018	PTEN induced kinase 1
ENSG00000189410	5.53793	1.32676	0.326127	4.06822	4.74e-05	0.000196136	SH2D5	400745	SH2 domain containing 5
ENSG00000117298	254.2	0.904452	0.0716146	12.6294	1.45e-36	8.9e-35	ECE1	1889	endothelin converting enzyme 1
ENSG00000142798	137.895	0.886327	0.0905552	9.78769	1.27e-22	3.47e-21	HSPG2	3339	heparan sulfate proteoglycan 2
ENSG00000088280	29.7613	-1.19677	0.154613	-7.74041	9.91e-15	1.43e-13	ASAP3	55616	ArfGAP with SH3 domain, ankyrin repeat and PH domain 3
ENSG00000011009	590.859	0.781881	0.0701543	11.1452	7.56e-29	2.98e-27	LYPLA2	11313	lysophospholipase 2
ENSG00000142677	9.80776	-1.87266	0.312285	-5.99663	2.01e-09	1.63e-08	IL22RA1	58985	interleukin 22 receptor subunit alpha 1
ENSG00000001461	42.2572	1.59387	0.122162	13.0472	6.6e-39	4.6e-37	NIPAL3	57185	NIPA like domain containing 3
ENSG00000158006	18.2171	1.06871	0.172594	6.19203	5.94e-10	5.12e-09	PAFAH2	5051	platelet activating factor acetylhydrolase 2
ENSG00000142669	58.3174	1.38988	0.132485	10.4908	9.52e-26	3.18e-24	SH3BGRL3	83442	SH3 domain binding glutamate rich protein like 3
ENSG00000131910	94.786	1.69067	0.0969798	17.4332	4.62e-68	1.39e-65	NR0B2	8431	nuclear receptor subfamily 0 group B member 2
ENSG00000175707	20.7639	1.0944	0.17099	6.40034	1.55e-10	1.44e-09	KDF1	126695	keratinocyte differentiation factor 1
ENSG00000253368	683.083	1.05608	0.0971222	10.8738	1.54e-27	5.74e-26	TRNP1	388610	TMF1 regulated nuclear protein 1
ENSG00000142784	22.9536	1.15985	0.159143	7.28808	3.14e-13	3.86e-12	WDTC1	23038	WD and tetratricopeptide repeats 1
ENSG00000142765	12.9806	0.861057	0.217485	3.95915	7.52e-05	0.000298629	SYTL1	84958	synaptotagmin like 1
ENSG00000142733	7.30622	1.36202	0.28386	4.79819	1.6e-06	8.6e-06	MAP3K6	9064	mitogen-activated protein kinase kinase kinase 6
ENSG00000126705	14.1777	0.884146	0.195564	4.52101	6.15e-06	3e-05	AHDC1	27245	AT-hook DNA binding motif containing 1
ENSG00000169403	9.45603	2.24367	0.268732	8.34912	6.88e-17	1.2e-15	PTAFR	5724	platelet activating factor receptor
ENSG00000120656	35.0222	0.770947	0.169984	4.5354	5.75e-06	2.82e-05	TAF12	6883	TATA-box binding protein associated factor 12
ENSG00000253304	16.3928	0.910457	0.181708	5.01055	5.43e-07	3.13e-06	TMEM200B	399474	transmembrane protein 200B
ENSG00000162511	3.98992	2.13214	0.421076	5.06354	4.12e-07	2.41e-06	LAPTM5	7805	lysosomal protein transmembrane 5
ENSG00000162512	12.9341	2.92424	0.30557	9.56977	1.07e-21	2.71e-20	SDC3	9672	syndecan 3
ENSG00000142910	117.377	0.893329	0.11109	8.04151	8.87e-16	1.41e-14	TINAGL1	64129	tubulointerstitial nephritis antigen like 1
ENSG00000084636	19.1167	-1.30623	0.214818	-6.08063	1.2e-09	9.95e-09	COL16A1	1307	collagen type XVI alpha 1 chain
ENSG00000183615	2.71645	1.70484	0.464508	3.67021	0.000242353	0.000866109	FAM167B	84734	family with sequence similarity 167 member B
ENSG00000182866	1.62685	3.78978	0.657846	5.76089	8.37e-09	6.21e-08	LCK	3932	LCK proto-oncogene, Src family tyrosine kinase
ENSG00000160062	19.6536	-1.92187	0.234765	-8.18635	2.69e-16	4.48e-15	ZBTB8A	653121	zinc finger and BTB domain containing 8A
ENSG00000121900	2.60228	1.83751	0.483704	3.79884	0.000145373	0.000543462	TMEM54	113452	transmembrane protein 54
ENSG00000134686	243.324	0.713491	0.0762514	9.35708	8.2e-21	1.93e-19	PHC2	1912	polyhomeotic homolog 2
ENSG00000142687	356.864	0.714989	0.0525861	13.5965	4.2e-42	3.59e-40	KIAA0319L	79932	KIAA0319 like
ENSG00000020129	7.76744	0.9247	0.255291	3.62215	0.00029217	0.00102472	NCDN	23154	neurochondrin
ENSG00000142694	15.3326	0.756933	0.206772	3.6607	0.000251524	0.000894755	EVA1B	55194	eva-1 homolog B
ENSG00000163879	1.66351	2.1182	0.607502	3.48673	0.000488956	0.00163385	DNALI1	7802	dynein axonemal light intermediate chain 1
ENSG00000183386	28.6506	1.00523	0.15598	6.44457	1.16e-10	1.09e-09	FHL3	2275	four and a half LIM domains 3
ENSG00000158315	9.90854	-2.28039	0.331194	-6.88537	5.76e-12	6.2e-11	RHBDL2	54933	rhomboid like 2
ENSG00000174574	557.135	-0.929454	0.120937	-7.68543	1.52e-14	2.16e-13	AKIRIN1	79647	akirin 1
ENSG00000127603	497.757	0.755046	0.0578673	13.0479	6.53e-39	4.57e-37	MACF1	23499	microtubule actin crosslinking factor 1
ENSG00000116990	5.53513	1.0876	0.304919	3.56683	0.00036132	0.00124294	MYCL	4610	MYCL proto-oncogene, bHLH transcription factor
ENSG00000049089	30.8142	0.771736	0.135096	5.71248	1.11e-08	8.16e-08	COL9A2	1298	collagen type IX alpha 2 chain
ENSG00000117010	15.2788	-0.989717	0.204456	-4.84073	1.29e-06	7.03e-06	ZNF684	127396	zinc finger protein 684
ENSG00000179862	53.5084	0.74634	0.135765	5.49728	3.86e-08	2.63e-07	CITED4	163732	Cbp/p300 interacting transactivator with Glu/Asp rich carboxy-terminal domain 4
ENSG00000010803	78.2342	-0.946364	0.122662	-7.71522	1.21e-14	1.73e-13	SCMH1	22955	Scm polycomb group protein homolog 1
ENSG00000177181	5.70632	-1.78475	0.401826	-4.4416	8.93e-06	4.21e-05	RIMKLA	284716	ribosomal modification protein rimK like family member A
ENSG00000117394	656.15	3.19737	0.179133	17.8491	2.94e-71	9.39e-69	SLC2A1	6513	solute carrier family 2 member 1
ENSG00000227533	3.38418	3.1179	0.527579	5.90983	3.42e-09	2.67e-08	SLC2A1-AS1	440584	SLC2A1 antisense RNA 1
ENSG00000243710	5.28497	4.31941	0.586908	7.35961	1.84e-13	2.32e-12	CFAP57	149465	cilia and flagella associated protein 57
ENSG00000066056	5.2042	3.81695	0.708075	5.39061	7.02e-08	4.62e-07	TIE1	7075	tyrosine kinase with immunoglobulin like and EGF like domains 1
ENSG00000198198	9.3412	0.886723	0.259717	3.41419	0.000639726	0.00208368	SZT2	23334	SZT2 subunit of KICSTOR complex
ENSG00000066135	76.4094	1.0531	0.0923577	11.4024	4.07e-30	1.72e-28	KDM4A	9682	lysine demethylase 4A
ENSG00000117408	10.8918	0.946985	0.223634	4.23453	2.29e-05	0.00010024	IPO13	9670	importin 13
ENSG00000173846	56.3523	1.37009	0.10921	12.5455	4.21e-36	2.5e-34	PLK3	1263	polo like kinase 3
ENSG00000222009	12.7109	1.81103	0.212519	8.52175	1.57e-17	2.87e-16	BTBD19	149478	BTB domain containing 19
ENSG00000117461	36.3218	1.332	0.133493	9.97806	1.9e-23	5.42e-22	PIK3R3	8503	phosphoinositide-3-kinase regulatory subunit 3
ENSG00000117472	25.1693	3.91993	0.244277	16.0471	5.99e-58	1.19e-55	TSPAN1	10103	tetraspanin 1
ENSG00000085998	32.0998	0.798691	0.135452	5.89649	3.71e-09	2.88e-08	POMGNT1	55624	protein O-linked mannose N-acetylglucosaminyltransferase 1 (beta 1,2-)
ENSG00000085999	43.3067	-0.78148	0.186721	-4.18527	2.85e-05	0.00012233	RAD54L	8438	RAD54 like
ENSG00000132128	210.834	0.749224	0.128572	5.82726	5.63e-09	4.28e-08	LRRC41	10489	leucine rich repeat containing 41
ENSG00000117834	12.5135	-0.801418	0.218111	-3.67436	0.000238442	0.000854626	SLC5A9	200010	solute carrier family 5 member 9
ENSG00000169213	90.7568	3.62352	0.316467	11.4499	2.35e-30	1.02e-28	RAB3B	5865	RAB3B, member RAS oncogene family
ENSG00000134717	70.8305	-0.793876	0.11557	-6.86924	6.45e-12	6.91e-11	BTF3L4	91408	basic transcription factor 3 like 4
ENSG00000085840	16.1828	-0.807365	0.199304	-4.05092	5.1e-05	0.000209862	ORC1	4998	origin recognition complex subunit 1
ENSG00000157193	130.813	-0.760942	0.0937359	-8.11794	4.74e-16	7.72e-15	LRP8	7804	LDL receptor related protein 8
ENSG00000211452	6.35101	-1.24063	0.332942	-3.72626	0.000194345	0.000708839	DIO1	1733	iodothyronine deiodinase 1
ENSG00000169174	107.922	-7.25114	0.483258	-15.0047	6.84e-51	9.67e-49	PCSK9	255738	proprotein convertase subtilisin/kexin type 9
ENSG00000157131	14.1009	-2.56426	0.295192	-8.68677	3.73e-18	7.22e-17	C8A	731	complement C8 alpha chain
ENSG00000177606	407.547	0.975644	0.0632627	15.4221	1.16e-53	1.84e-51	JUN	3725	Jun proto-oncogene, AP-1 transcription factor subunit
ENSG00000132854	68.9582	-3.11683	0.162341	-19.1993	3.75e-82	1.84e-79	KANK4	163782	KN motif and ankyrin repeat domains 4
ENSG00000088035	22.6984	0.857227	0.157109	5.45626	4.86e-08	3.27e-07	ALG6	29929	ALG6 alpha-1,3-glucosyltransferase
ENSG00000162437	14.031	-1.4964	0.242853	-6.16175	7.19e-10	6.14e-09	RAVER2	55225	ribonucleoprotein, PTB binding 2
ENSG00000162433	440.108	-1.09584	0.0757406	-14.4684	1.92e-47	2.28e-45	AK4	205	adenylate kinase 4
ENSG00000116717	145.288	0.880464	0.108234	8.13481	4.13e-16	6.77e-15	GADD45A	1647	growth arrest and DNA damage inducible alpha
ENSG00000116761	21.958	-0.779763	0.173717	-4.4887	7.17e-06	3.45e-05	CTH	1491	cystathionine gamma-lyase
ENSG00000137955	51.7467	-0.7576	0.169007	-4.48264	7.37e-06	3.54e-05	RABGGTB	5876	Rab geranylgeranyltransferase subunit beta
ENSG00000142892	21.1518	-0.854262	0.17761	-4.80977	1.51e-06	8.15e-06	PIGK	10026	phosphatidylinositol glycan anchor biosynthesis class K
ENSG00000117151	18.987	1.08341	0.170874	6.3404	2.29e-10	2.08e-09	CTBS	1486	chitobiase
ENSG00000153904	46.6122	-0.805632	0.142619	-5.64885	1.62e-08	1.16e-07	DDAH1	23576	dimethylarginine dimethylaminohydrolase 1
ENSG00000142871	452.918	1.77473	0.224535	7.90402	2.7e-15	4.1e-14	CCN1	3491	cellular communication network factor 1
ENSG00000097033	226.076	0.823331	0.0605538	13.5967	4.19e-42	3.59e-40	SH3GLB1	51100	SH3 domain containing GRB2 like, endophilin B1
ENSG00000162645	13.2957	2.31209	0.229985	10.0532	8.89e-24	2.61e-22	GBP2	2634	guanylate binding protein 2
ENSG00000154511	7.81741	-1.22006	0.303309	-4.02251	5.76e-05	0.000234896	DIPK1A	388650	divergent protein kinase domain 1A
ENSG00000137936	10.76	1.02972	0.220714	4.66541	3.08e-06	1.58e-05	BCAR3	8412	BCAR3 adaptor protein, NSP family member
ENSG00000137962	144.326	0.707921	0.0927794	7.63015	2.34e-14	3.26e-13	ARHGAP29	9411	Rho GTPase activating protein 29
ENSG00000117525	4.91866	-1.30234	0.383944	-3.39202	0.000693798	0.00224094	F3	2152	coagulation factor III, tissue factor
ENSG00000117519	305.71	-1.19517	0.274664	-4.35138	1.35e-05	6.17e-05	CNN3	1266	calponin 3
ENSG00000172339	43.3217	-1.34516	0.15032	-8.94866	3.6e-19	7.45e-18	ALG14	199857	ALG14 UDP-N-acetylglucosaminyltransferase subunit
ENSG00000156876	48.6623	-0.79144	0.121099	-6.53548	6.34e-11	6.15e-10	SASS6	163786	SAS-6 centriolar assembly protein
ENSG00000137992	44.4916	-0.956234	0.128169	-7.46072	8.61e-14	1.13e-12	DBT	1629	dihydrolipoamide branched chain transacylase E2
ENSG00000134215	45.911	-0.953492	0.147255	-6.47509	9.48e-11	9.01e-10	VAV3	10451	vav guanine nucleotide exchange factor 3
ENSG00000134222	40.4002	-0.760486	0.13635	-5.57743	2.44e-08	1.72e-07	PSRC1	84722	proline and serine rich coiled-coil 1
ENSG00000143028	5.20242	2.63772	0.36574	7.212	5.51e-13	6.59e-12	SYPL2	284612	synaptophysin like 2
ENSG00000198758	36.4153	0.802844	0.126438	6.3497	2.16e-10	1.96e-09	EPS8L3	79574	EPS8 like 3
ENSG00000184371	17.5489	0.929938	0.230878	4.02784	5.63e-05	0.000230083	CSF1	1435	colony stimulating factor 1
ENSG00000116396	9.13022	-2.00754	0.323367	-6.20822	5.36e-10	4.64e-09	KCNC4	3749	potassium voltage-gated channel subfamily C member 4
ENSG00000064886	2.61429	3.36091	0.603496	5.56907	2.56e-08	1.8e-07	CHI3L2	1117	chitinase 3 like 2
ENSG00000173947	1.26924	2.55359	0.719422	3.5495	0.000385961	0.00131723	PIFO	128344	primary cilia formation
ENSG00000197852	25.2866	1.07134	0.185869	5.76397	8.22e-09	6.11e-08	INKA2	55924	inka box actin regulator 2
ENSG00000143079	56.0592	1.47168	0.134813	10.9164	9.62e-28	3.62e-26	CTTNBP2NL	55917	CTTNBP2 N-terminal like
ENSG00000155366	93.7499	1.21612	0.09613	12.6508	1.11e-36	6.91e-35	RHOC	389	ras homolog family member C
ENSG00000173212	15.9793	0.860222	0.200282	4.29506	1.75e-05	7.81e-05	MAB21L3	126868	mab-21 like 3
ENSG00000163399	1939.69	0.747937	0.0825428	9.06121	1.29e-19	2.73e-18	ATP1A1	476	ATPase Na+/K+ transporting subunit alpha 1
ENSG00000116815	16.8628	1.18858	0.221481	5.36652	8.03e-08	5.23e-07	CD58	965	CD58 molecule
ENSG00000143061	3.97567	-1.79082	0.481115	-3.72223	0.000197471	0.00071917	IGSF3	3321	immunoglobulin superfamily member 3
ENSG00000092621	105.344	-1.51419	0.104669	-14.4665	1.97e-47	2.32e-45	PHGDH	26227	phosphoglycerate dehydrogenase
ENSG00000143127	15.1493	5.36888	0.448964	11.9584	5.87e-33	2.83e-31	ITGA10	8515	integrin subunit alpha 10
ENSG00000131788	28.6501	0.792268	0.143776	5.51044	3.58e-08	2.46e-07	PIAS3	10401	protein inhibitor of activated STAT 3
ENSG00000174827	13.8418	-0.823618	0.23917	-3.44365	0.000573911	0.00188518	PDZK1	5174	PDZ domain containing 1
ENSG00000232527	44.3603	0.923571	0.142255	6.49236	8.45e-11	8.08e-10	LINC02802	100996732	long intergenic non-protein coding RNA 2802
ENSG00000184678	7.83706	2.60744	0.300155	8.68698	3.72e-18	7.21e-17	H2BC21	8349	H2B clustered histone 21
ENSG00000163131	4.09678	1.29637	0.36442	3.55734	0.000374624	0.0012833	CTSS	1520	cathepsin S
ENSG00000197622	68.5881	0.770276	0.13786	5.58737	2.31e-08	1.63e-07	CDC42SE1	56882	CDC42 small effector 1
ENSG00000213190	3.45812	3.14122	0.501862	6.25914	3.87e-10	3.42e-09	MLLT11	10962	MLLT11 transcription factor 7 cofactor
ENSG00000143416	17.7909	-0.881767	0.209525	-4.20842	2.57e-05	0.00011146	SELENBP1	8991	selenium binding protein 1
ENSG00000143376	44.1847	-0.792557	0.127068	-6.23725	4.45e-10	3.91e-09	SNX27	81609	sorting nexin 27
ENSG00000163191	31.4026	2.17972	0.231692	9.40785	5.06e-21	1.2e-19	S100A11	6282	S100 calcium binding protein A11
ENSG00000187180	1.09482	3.96422	0.729577	5.43358	5.52e-08	3.68e-07	LCE2C	353140	late cornified envelope 2C
ENSG00000197956	363.045	2.51062	0.245701	10.2182	1.64e-24	5.14e-23	S100A6	6277	S100 calcium binding protein A6
ENSG00000196154	23.7674	2.35373	0.207857	11.3238	1e-29	4.17e-28	S100A4	6275	S100 calcium binding protein A4
ENSG00000188015	24.9404	4.57417	0.277872	16.4615	6.94e-61	1.62e-58	S100A3	6274	S100 calcium binding protein A3
ENSG00000196754	5.62108	2.6339	0.354169	7.43684	1.03e-13	1.34e-12	S100A2	6273	S100 calcium binding protein A2
ENSG00000188643	125.607	1.89112	0.101095	18.7063	4.4e-78	1.8e-75	S100A16	140576	S100 calcium binding protein A16
ENSG00000189334	5.54067	2.16895	0.336829	6.43931	1.2e-10	1.13e-09	S100A14	57402	S100 calcium binding protein A14
ENSG00000189171	290.029	0.857433	0.103361	8.29556	1.08e-16	1.85e-15	S100A13	6284	S100 calcium binding protein A13
ENSG00000160712	96.5383	0.848493	0.105193	8.06602	7.26e-16	1.16e-14	IL6R	3570	interleukin 6 receptor
ENSG00000163346	52.0787	2.01824	0.158404	12.7411	3.5e-37	2.28e-35	PBXIP1	57326	PBX homeobox interacting protein 1
ENSG00000169242	330.933	-0.757627	0.107181	-7.06867	1.56e-12	1.79e-11	EFNA1	1942	ephrin A1
ENSG00000169231	1.74091	3.35481	0.65389	5.13055	2.89e-07	1.74e-06	THBS3	7059	thrombospondin 3
ENSG00000160767	58.7479	-0.797388	0.111657	-7.14138	9.24e-13	1.07e-11	FAM189B	10712	family with sequence similarity 189 member B
ENSG00000143630	4.91684	-1.82269	0.412718	-4.41632	1e-05	4.69e-05	HCN3	57657	hyperpolarization activated cyclic nucleotide gated potassium channel 3
ENSG00000160752	324.533	-1.24062	0.113457	-10.9347	7.87e-28	2.98e-26	FDPS	2224	farnesyl diphosphate synthase
ENSG00000132718	2.08013	2.40921	0.567556	4.24488	2.19e-05	9.6e-05	SYT11	23208	synaptotagmin 11
ENSG00000143622	21.555	-0.823289	0.175711	-4.68547	2.79e-06	1.44e-05	RIT1	6016	Ras like without CAAX 1
ENSG00000160783	49.7474	-1.03005	0.141254	-7.29215	3.05e-13	3.75e-12	PMF1	11243	polyamine modulated factor 1
ENSG00000116604	31.3436	1.07098	0.152513	7.02222	2.18e-12	2.45e-11	MEF2D	4209	myocyte enhancer factor 2D
ENSG00000143320	2.00147	3.35956	0.776373	4.32725	1.51e-05	6.83e-05	CRABP2	1382	cellular retinoic acid binding protein 2
ENSG00000027869	13.6843	2.16853	0.226936	9.55567	1.23e-21	3.08e-20	SH2D2A	9047	SH2 domain containing 2A
ENSG00000143315	142.83	0.896765	0.0949783	9.44178	3.66e-21	8.81e-20	PIGM	93183	phosphatidylinositol glycan anchor biosynthesis class M
ENSG00000177807	89.3582	1.86773	0.142166	13.1377	2e-39	1.46e-37	KCNJ10	3766	potassium inwardly rectifying channel subfamily J member 10
ENSG00000162729	25.0325	0.870731	0.158371	5.49805	3.84e-08	2.62e-07	IGSF8	93185	immunoglobulin superfamily member 8
ENSG00000158769	200.482	0.91688	0.0754791	12.1475	5.92e-34	3.04e-32	F11R	50848	F11 receptor
ENSG00000162755	7.47299	1.38558	0.315005	4.39861	1.09e-05	5.06e-05	KLHDC9	126823	kelch domain containing 9
ENSG00000158859	8.46939	2.13285	0.324343	6.5759	4.84e-11	4.74e-10	ADAMTS4	9507	ADAM metallopeptidase with thrombospondin type 1 motif 4
ENSG00000158864	1115.86	0.840454	0.0832923	10.0904	6.09e-24	1.82e-22	NDUFS2	4720	NADH:ubiquinone oxidoreductase core subunit S2
ENSG00000158869	4.55524	2.65541	0.404622	6.5627	5.28e-11	5.16e-10	FCER1G	2207	Fc fragment of IgE receptor Ig
ENSG00000158887	67.1848	1.04972	0.136303	7.70134	1.35e-14	1.92e-13	MPZ	4359	myelin protein zero
ENSG00000132196	14.774	-1.64011	0.267406	-6.13341	8.6e-10	7.29e-09	HSD17B7	51478	hydroxysteroid 17-beta dehydrogenase 7
ENSG00000143248	2.91534	2.03623	0.493299	4.12779	3.66e-05	0.000154427	RGS5	8490	regulator of G protein signaling 5
ENSG00000143228	109.622	-0.742725	0.103094	-7.20436	5.83e-13	6.94e-12	NUF2	83540	NUF2 component of NDC80 kinetochore complex
ENSG00000143162	11.208	-0.976699	0.25954	-3.7632	0.000167756	0.000620945	CREG1	8804	cellular repressor of E1A stimulated genes 1
ENSG00000143153	748.33	1.00372	0.0500256	20.0642	1.52e-89	9.3e-87	ATP1B1	481	ATPase Na+/K+ transporting subunit beta 1
ENSG00000000460	30.2534	-0.783664	0.150288	-5.21441	1.84e-07	1.14e-06	C1orf112	55732	chromosome 1 open reading frame 112
ENSG00000117593	18.4141	-1.144	0.194765	-5.87375	4.26e-09	3.28e-08	DARS2	55157	aspartyl-tRNA synthetase 2, mitochondrial
ENSG00000117601	109.91	-3.6224	0.199089	-18.1949	5.67e-74	2.03e-71	SERPINC1	462	serpin family C member 1
ENSG00000186283	113.412	-0.722908	0.099557	-7.26125	3.84e-13	4.65e-12	TOR3A	64222	torsin family 3 member A
ENSG00000116260	115.462	1.71522	0.119262	14.382	6.72e-47	7.48e-45	QSOX1	5768	quiescin sulfhydryl oxidase 1
ENSG00000143344	48.8203	0.869307	0.126055	6.89626	5.34e-12	5.78e-11	RGL1	23179	ral guanine nucleotide dissociation stimulator like 1
ENSG00000198756	19.8102	6.01277	0.460615	13.0538	6.05e-39	4.25e-37	COLGALT2	23127	collagen beta(1-O)galactosyltransferase 2
ENSG00000066279	193.742	-1.01204	0.0724298	-13.9726	2.29e-44	2.29e-42	ASPM	259266	abnormal spindle microtubule assembly
ENSG00000163362	9.75009	0.815912	0.230866	3.53413	0.000409119	0.00138853	INAVA	55765	innate immunity activator
ENSG00000134369	1.2134	2.77013	0.748439	3.70121	0.000214577	0.000775132	NAV1	89796	neuron navigator 1
ENSG00000198892	6.48783	3.35518	0.395049	8.49308	2.01e-17	3.64e-16	SHISA4	149345	shisa family member 4
ENSG00000228288	14.5663	1.02299	0.198011	5.16631	2.39e-07	1.46e-06	PCAT6	100506696	prostate cancer associated transcript 6
ENSG00000163485	6.73037	3.58176	0.425552	8.41675	3.87e-17	6.86e-16	ADORA1	134	adenosine A1 receptor
ENSG00000133055	23.1208	5.65157	0.607523	9.30265	1.37e-20	3.15e-19	MYBPH	4608	myosin binding protein H
ENSG00000133048	12.9017	5.65338	0.736815	7.67273	1.68e-14	2.37e-13	CHI3L1	1116	chitinase 3 like 1
ENSG00000170498	4.95743	4.03519	0.547563	7.36936	1.71e-13	2.16e-12	KISS1	3814	KiSS-1 metastasis suppressor
ENSG00000174567	69.8168	1.4738	0.103775	14.2019	8.91e-46	9.43e-44	GOLT1A	127845	golgi transport 1A
ENSG00000143850	22.828	0.836634	0.148537	5.63249	1.78e-08	1.27e-07	PLEKHA6	22874	pleckstrin homology domain containing A6
ENSG00000196188	13.6828	4.46696	0.373099	11.9726	4.95e-33	2.43e-31	CTSE	1510	cathepsin E
ENSG00000182795	1.78201	3.94101	0.643576	6.12361	9.15e-10	7.72e-09	C1orf116	79098	chromosome 1 open reading frame 116
ENSG00000123838	41.4432	1.40346	0.158951	8.8295	1.05e-18	2.1e-17	C4BPA	722	complement component 4 binding protein alpha
ENSG00000153363	20.9251	1.09741	0.171505	6.39868	1.57e-10	1.45e-09	LINC00467	84791	long intergenic non-protein coding RNA 467
ENSG00000220749	9.50767	-0.835447	0.252766	-3.30522	0.000949024	0.00297831	RPL21P28	100131205	ribosomal protein L21 pseudogene 28
ENSG00000117697	123.993	-0.850259	0.110591	-7.68835	1.49e-14	2.12e-13	NSL1	25936	NSL1 component of MIS12 kinetochore complex
ENSG00000162769	58.4132	-0.79362	0.114472	-6.93288	4.12e-12	4.51e-11	FLVCR1	28982	feline leukemia virus subgroup C cellular receptor 1
ENSG00000092969	1.86028	3.47039	0.655622	5.29328	1.2e-07	7.65e-07	TGFB2	7042	transforming growth factor beta 2
ENSG00000143353	23.5593	1.04932	0.164061	6.39593	1.6e-10	1.48e-09	LYPLAL1	127018	lysophospholipase like 1
ENSG00000196660	14.3255	-3.32527	0.374486	-8.87956	6.71e-19	1.35e-17	SLC30A10	55532	solute carrier family 30 member 10
ENSG00000162817	76.511	-1.03902	0.111797	-9.29375	1.49e-20	3.41e-19	C1orf115	79762	chromosome 1 open reading frame 115
ENSG00000117791	18.2903	-1.02727	0.204163	-5.03164	4.86e-07	2.82e-06	2021-03-02	54996	mitochondrial amidoxime reducing component 2
ENSG00000186205	51.6614	-1.3685	0.136657	-10.0141	1.32e-23	3.81e-22	2021-03-01	64757	mitochondrial amidoxime reducing component 1
ENSG00000162909	19.1688	3.0174	0.242692	12.433	1.73e-35	9.75e-34	CAPN2	824	calpain 2
ENSG00000143786	3.78321	2.81747	0.524306	5.37372	7.71e-08	5.04e-07	CNIH3	149111	cornichon family AMPA receptor auxiliary protein 3
ENSG00000185155	108.463	-0.701615	0.15218	-4.61043	4.02e-06	2.02e-05	MIXL1	83881	Mix paired-like homeobox
ENSG00000198835	20.8728	1.0384	0.174911	5.93671	2.91e-09	2.29e-08	GJC2	57165	gap junction protein gamma 2
ENSG00000181873	40.813	-1.7	0.156424	-10.8679	1.64e-27	6.09e-26	IBA57	200205	iron-sulfur cluster assembly factor IBA57
ENSG00000135776	16.3357	-0.917855	0.217891	-4.21244	2.53e-05	0.000109589	ABCB10	23456	ATP binding cassette subfamily B member 10
ENSG00000119280	31.4678	-0.92136	0.154743	-5.95413	2.61e-09	2.07e-08	C1orf198	84886	chromosome 1 open reading frame 198
ENSG00000173409	9.7047	-1.13913	0.265328	-4.29327	1.76e-05	7.86e-05	ARV1	64801	ARV1 homolog, fatty acid homeostasis modulator
ENSG00000182118	9.66834	0.829185	0.248141	3.34159	0.000832991	0.00264468	FAM89A	375061	family with sequence similarity 89 member A
ENSG00000168243	76.8851	-2.53039	0.135269	-18.7064	4.39e-78	1.8e-75	GNG4	2786	G protein subunit gamma 4
ENSG00000116962	132.585	-0.840741	0.104368	-8.05554	7.91e-16	1.26e-14	NID1	4811	nidogen 1
ENSG00000077585	3.87755	3.34511	0.48018	6.96637	3.25e-12	3.58e-11	GPR137B	7107	G protein-coupled receptor 137B
ENSG00000186197	46.6146	-0.810059	0.129276	-6.26613	3.7e-10	3.28e-09	EDARADD	128178	EDAR associated death domain
ENSG00000054282	31.3686	1.13025	0.146576	7.71103	1.25e-14	1.79e-13	SDCCAG8	10806	serologically defined colon cancer antigen 8
ENSG00000179456	15.4823	0.973026	0.186084	5.22896	1.7e-07	1.06e-06	ZBTB18	10472	zinc finger and BTB domain containing 18
ENSG00000143653	169.244	-0.834317	0.118368	-7.04848	1.81e-12	2.06e-11	SCCPDH	51097	saccharopine dehydrogenase (putative)
ENSG00000171161	48.537	0.841081	0.135581	6.20354	5.52e-10	4.77e-09	ZNF672	79894	zinc finger protein 672
ENSG00000184731	3.03069	2.36795	0.458768	5.16155	2.45e-07	1.49e-06	FAM110C	642273	family with sequence similarity 110 member C
ENSG00000189292	6.97023	3.07103	0.380441	8.07227	6.9e-16	1.11e-14	ALKAL2	285016	ALK and LTK ligand 2
ENSG00000182551	359.149	-0.982714	0.0668535	-14.6995	6.49e-49	8.09e-47	ADI1	55256	acireductone dioxygenase 1
ENSG00000151693	69.9696	1.67281	0.125083	13.3735	8.63e-41	6.79e-39	ASAP2	8853	ArfGAP with SH3 domain, ankyrin repeat and PH domain 2
ENSG00000115756	191.192	1.39906	0.105809	13.2225	6.51e-40	4.88e-38	HPCAL1	3241	hippocalcin like 1
ENSG00000162975	1.26335	3.90759	0.706413	5.53159	3.17e-08	2.2e-07	KCNF1	3754	potassium voltage-gated channel modifier subfamily F member 1
ENSG00000071575	8.13562	3.5706	0.379014	9.42077	4.48e-21	1.07e-19	TRIB2	28951	tribbles pseudokinase 2
ENSG00000134323	2.03536	-2.73306	0.795177	-3.43705	0.000588086	0.00192958	MYCN	4613	MYCN proto-oncogene, bHLH transcription factor
ENSG00000143867	4.08729	2.54245	0.418572	6.0741	1.25e-09	1.03e-08	OSR1	130497	odd-skipped related transcription factor 1
ENSG00000132031	134.754	2.59482	0.21379	12.1373	6.7e-34	3.43e-32	MATN3	4148	matrilin 3
ENSG00000068697	1711.6	0.765205	0.0671197	11.4006	4.15e-30	1.75e-28	LAPTM4A	9741	lysosomal protein transmembrane 4 alpha
ENSG00000143878	274.266	0.708776	0.0950955	7.45331	9.1e-14	1.19e-12	RHOB	388	ras homolog family member B
ENSG00000143869	25.5783	-0.990045	0.16316	-6.06793	1.3e-09	1.07e-08	GDF7	151449	growth differentiation factor 7
ENSG00000084674	9841.69	-1.11832	0.0578329	-19.3371	2.62e-83	1.48e-80	APOB	338	apolipoprotein B
ENSG00000084676	10.6125	-1.22772	0.269555	-4.55463	5.25e-06	2.59e-05	NCOA1	8648	nuclear receptor coactivator 1
ENSG00000224165	2.40735	1.58561	0.479022	3.3101	0.00093263	0.00293375	DNAJC27-AS1	729723	DNAJC27 antisense RNA 1
ENSG00000084731	12.9279	2.06054	0.238617	8.63532	5.86e-18	1.11e-16	KIF3C	3797	kinesin family member 3C
ENSG00000115163	45.3983	-0.900919	0.150119	-6.00136	1.96e-09	1.58e-08	CENPA	1058	centromere protein A
ENSG00000138030	57.1681	-0.760923	0.15003	-5.07179	3.94e-07	2.32e-06	KHK	3795	ketohexokinase
ENSG00000115194	36.6407	-3.96017	0.274371	-14.4336	3.18e-47	3.65e-45	SLC30A3	7781	solute carrier family 30 member 3
ENSG00000163794	4.25472	1.21959	0.360609	3.38201	0.000719566	0.00231642	UCN	7349	urocortin
ENSG00000163795	7.65359	1.77603	0.276935	6.41317	1.43e-10	1.33e-09	ZNF513	130557	zinc finger protein 513
ENSG00000115226	8.34382	1.03052	0.276098	3.73244	0.000189636	0.000692867	FNDC4	64838	fibronectin type III domain containing 4
ENSG00000243943	64.6397	0.700277	0.110483	6.33834	2.32e-10	2.1e-09	ZNF512	84450	zinc finger protein 512
ENSG00000171174	19.8104	1.22949	0.168922	7.27844	3.38e-13	4.12e-12	RBKS	64080	ribokinase
ENSG00000158019	82.976	0.905547	0.0970331	9.33235	1.04e-20	2.41e-19	BABAM2	9577	BRISC and BRCA1 A complex member 2
ENSG00000075426	56.2144	1.74169	0.112464	15.4866	4.27e-54	6.98e-52	FOSL2	2355	FOS like 2, AP-1 transcription factor subunit
ENSG00000163803	3.80647	3.17038	0.485322	6.53253	6.47e-11	6.26e-10	PLB1	151056	phospholipase B1
ENSG00000115295	2.55436	2.95708	0.543044	5.44537	5.17e-08	3.47e-07	CLIP4	79745	CAP-Gly domain containing linker protein family member 4
ENSG00000119801	43.1342	1.63288	0.145328	11.2359	2.72e-29	1.1e-27	YPEL5	51646	yippee like 5
ENSG00000049323	11.8554	5.2536	0.45742	11.4853	1.56e-30	6.85e-29	LTBP1	4052	latent transforming growth factor beta binding protein 1
ENSG00000218739	117.951	0.834493	0.106836	7.81096	5.68e-15	8.38e-14	CEBPZOS	100505876	CEBPZ opposite strand
ENSG00000115828	9.73923	5.07026	0.638001	7.94711	1.91e-15	2.94e-14	QPCT	25797	glutaminyl-peptide cyclotransferase
ENSG00000231312	71.7776	0.779654	0.0989599	7.87849	3.31e-15	4.99e-14	MAP4K3-DT	728730	MAP4K3 divergent transcript
ENSG00000138050	28.0713	-0.804709	0.159811	-5.03538	4.77e-07	2.77e-06	THUMPD2	80745	THUMP domain containing 2
ENSG00000162881	17.3265	-0.886259	0.206564	-4.29047	1.78e-05	7.95e-05	OXER1	165140	oxoeicosanoid receptor 1
ENSG00000152527	3.43943	-1.8329	0.496056	-3.69495	0.00021993	0.000792718	PLEKHH2	130271	pleckstrin homology, MyTH4 and FERM domain containing H2
ENSG00000138036	25.6393	0.738517	0.154564	4.77807	1.77e-06	9.42e-06	DYNC2LI1	51626	dynein cytoplasmic 2 light intermediate chain 1
ENSG00000143921	13.3279	-1.22326	0.238065	-5.13836	2.77e-07	1.67e-06	ABCG8	64241	ATP binding cassette subfamily G member 8
ENSG00000138095	433.942	-0.743133	0.0649371	-11.4439	2.52e-30	1.09e-28	LRPPRC	10128	leucine rich pentatricopeptide repeat containing
ENSG00000119729	58.1859	0.851019	0.128599	6.61764	3.65e-11	3.63e-10	RHOQ	23433	ras homolog family member Q
ENSG00000234690	5.61555	1.09327	0.323064	3.38406	0.000714214	0.00230031	EPCAM-DT	101927043	EPCAM divergent transcript
ENSG00000214595	16.0736	-2.39692	0.2645	-9.06206	1.28e-19	2.72e-18	EML6	400954	EMAP like 6
ENSG00000162927	22.8852	-1.08234	0.197461	-5.48129	4.22e-08	2.86e-07	PUS10	150962	pseudouridine synthase 10
ENSG00000186889	1.38993	2.67724	0.687386	3.89482	9.83e-05	0.000380819	TMEM17	200728	transmembrane protein 17
ENSG00000115504	321.052	1.09725	0.0700594	15.6618	2.76e-55	4.83e-53	EHBP1	23301	EH domain binding protein 1
ENSG00000196975	152.128	-0.839961	0.121682	-6.90293	5.09e-12	5.52e-11	ANXA4	307	annexin A4
ENSG00000163235	19.9584	2.63535	0.193452	13.6227	2.93e-42	2.54e-40	TGFA	7039	transforming growth factor alpha
ENSG00000124370	18.1982	-0.722472	0.194357	-3.71725	0.000201403	0.000731677	MCEE	84693	methylmalonyl-CoA epimerase
ENSG00000144035	10.2298	-2.46155	0.34385	-7.15878	8.14e-13	9.5e-12	NAT8	9027	N-acetyltransferase 8 (putative)
ENSG00000065911	249.057	-0.755541	0.0904608	-8.35214	6.7e-17	1.17e-15	MTHFD2	10797	methylenetetrahydrofolate dehydrogenase (NADP+ dependent) 2, methenyltetrahydrofolate cyclohydrolase
ENSG00000005448	7.86677	1.17353	0.34898	3.36274	0.000771721	0.00246716	WDR54	84058	WD repeat domain 54
ENSG00000115282	49.6713	-0.905081	0.120722	-7.49724	6.52e-14	8.7e-13	TTC31	64427	tetratricopeptide repeat domain 31
ENSG00000257702	23.4377	0.711101	0.163242	4.35611	1.32e-05	6.05e-05	LBX2-AS1	151534	LBX2 antisense RNA 1
ENSG00000115317	68.664	-0.771944	0.130072	-5.93476	2.94e-09	2.32e-08	HTRA2	27429	HtrA serine peptidase 2
ENSG00000159399	172.899	-1.26536	0.142666	-8.8694	7.35e-19	1.48e-17	HK2	3099	hexokinase 2
ENSG00000231172	79.3092	2.37235	0.21257	11.1603	6.38e-29	2.53e-27	LOC101927884	101927884	uncharacterized LOC101927884
ENSG00000034510	908.609	1.43614	0.0926351	15.5031	3.3e-54	5.46e-52	TMSB10	9168	thymosin beta 10
ENSG00000168874	14.1844	2.41535	0.249267	9.6898	3.33e-22	8.69e-21	ATOH8	84913	atonal bHLH transcription factor 8
ENSG00000172086	17.6538	1.95216	0.200325	9.74495	1.94e-22	5.18e-21	KRCC1	51315	lysine rich coiled-coil 1
ENSG00000163586	1063	-1.98933	0.241774	-8.22807	1.9e-16	3.2e-15	FABP1	2168	fatty acid binding protein 1
ENSG00000135956	68.4137	0.753139	0.0953794	7.89624	2.87e-15	4.35e-14	TMEM127	55654	transmembrane protein 127
ENSG00000121152	94.6233	-1.0758	0.125708	-8.55793	1.15e-17	2.13e-16	NCAPH	23397	non-SMC condensin I complex subunit H
ENSG00000114988	36.5014	-0.812636	0.137253	-5.92073	3.21e-09	2.51e-08	LMAN2L	81562	lectin, mannose binding 2 like
ENSG00000115085	2.45117	2.84661	0.555427	5.12509	2.97e-07	1.78e-06	ZAP70	7535	zeta chain of T cell receptor associated protein kinase 70
ENSG00000135951	18.6429	0.788895	0.199959	3.94528	7.97e-05	0.000314598	TSGA10	80705	testis specific 10
ENSG00000273045	8.03451	1.14198	0.267241	4.27322	1.93e-05	8.55e-05	C2orf15	150590	chromosome 2 open reading frame 15
ENSG00000115590	7.74553	1.48637	0.311931	4.76508	1.89e-06	9.99e-06	IL1R2	7850	interleukin 1 receptor type 2
ENSG00000115641	53.5735	1.80458	0.121477	14.8553	6.43e-50	8.37e-48	FHL2	2274	four and a half LIM domains 2
ENSG00000169679	102.499	-0.731187	0.0911284	-8.0237	1.03e-15	1.62e-14	BUB1	699	BUB1 mitotic checkpoint serine/threonine kinase
ENSG00000172965	868.927	0.992146	0.0836138	11.8658	1.78e-32	8.34e-31	MIR4435-2HG	541471	MIR4435-2 host gene
ENSG00000188177	12.3178	1.15556	0.223806	5.16322	2.43e-07	1.48e-06	ZC3H6	376940	zinc finger CCCH-type containing 6
ENSG00000136689	90.8212	-1.79076	0.162454	-11.0231	2.96e-28	1.13e-26	IL1RN	3557	interleukin 1 receptor antagonist
ENSG00000125637	14.8902	2.02175	0.203992	9.91093	3.73e-23	1.05e-21	PSD4	23550	pleckstrin and Sec7 domain containing 4
ENSG00000125618	15.6246	0.736447	0.191039	3.85495	0.000115755	0.000440894	PAX8	7849	paired box 8
ENSG00000146556	15.7174	0.84576	0.199237	4.245	2.19e-05	9.6e-05	WASH2P	375260	WASP family homolog 2, pseudogene
ENSG00000175497	11.6392	-2.72945	0.349086	-7.81884	5.33e-15	7.9e-14	DPP10	57628	dipeptidyl peptidase like 10
ENSG00000235026	15.815	-1.64712	0.241965	-6.80727	9.95e-12	1.05e-10	DPP10-AS1	389023	DPP10 antisense RNA 1
ENSG00000155368	2073.55	-0.726364	0.0708631	-10.2502	1.18e-24	3.73e-23	DBI	1622	diazepam binding inhibitor, acyl-CoA binding protein
ENSG00000144118	318.144	0.987885	0.0862001	11.4604	2.09e-30	9.1e-29	RALB	5899	RAS like proto-oncogene B
ENSG00000163083	30.1528	3.26086	0.32296	10.0968	5.71e-24	1.71e-22	INHBB	3625	inhibin subunit beta B
ENSG00000121988	47.3855	-0.810489	0.140885	-5.75286	8.77e-09	6.49e-08	ZRANB3	84083	zinc finger RANBP2-type containing 3
ENSG00000121966	4.26842	3.96506	0.570128	6.95469	3.53e-12	3.88e-11	CXCR4	7852	C-X-C motif chemokine receptor 4
ENSG00000150540	306.132	-0.713318	0.072717	-9.80951	1.02e-22	2.82e-21	HNMT	3176	histamine N-methyltransferase
ENSG00000115963	3.31463	3.35844	0.605777	5.54402	2.96e-08	2.06e-07	RND3	390	Rho family GTPase 3
ENSG00000153234	3.02611	4.97127	0.622739	7.98291	1.43e-15	2.24e-14	NR4A2	4929	nuclear receptor subfamily 4 group A member 2
ENSG00000153237	2.99263	4.03464	0.69946	5.76821	8.01e-09	5.97e-08	CCDC148	130940	coiled-coil domain containing 148
ENSG00000123636	68.3278	1.59963	0.128388	12.4594	1.24e-35	7.06e-34	BAZ2B	29994	bromodomain adjacent to zinc finger domain 2B
ENSG00000241399	4.7603	-1.66696	0.4105	-4.0608	4.89e-05	0.000201853	CD302	9936	CD302 molecule
ENSG00000227403	6.58946	1.95156	0.316254	6.17085	6.79e-10	5.81e-09	LINC01806	100996579	long intergenic non-protein coding RNA 1806
ENSG00000197635	4.84823	1.95419	0.353569	5.52703	3.26e-08	2.25e-07	DPP4	1803	dipeptidyl peptidase 4
ENSG00000182263	43.1107	-1.7464	0.149914	-11.6493	2.31e-31	1.04e-29	FIGN	55137	fidgetin, microtubule severing factor
ENSG00000163093	14.3899	0.73408	0.190929	3.84478	0.000120659	0.000457675	BBS5	129880	Bardet-Biedl syndrome 5
ENSG00000172878	18.0974	0.724657	0.166447	4.35369	1.34e-05	6.11e-05	METAP1D	254042	methionyl aminopeptidase type 1D, mitochondrial
ENSG00000144355	11.7436	2.64349	0.255503	10.3462	4.35e-25	1.4e-23	DLX1	1745	distal-less homeobox 1
ENSG00000115844	6.75396	1.48785	0.283901	5.24073	1.6e-07	1e-06	DLX2	1746	distal-less homeobox 2
ENSG00000152256	75.0382	-0.777194	0.105388	-7.37461	1.65e-13	2.09e-12	PDK1	5163	pyruvate dehydrogenase kinase 1
ENSG00000144354	173.438	-0.895504	0.126385	-7.08554	1.39e-12	1.59e-11	CDCA7	83879	cell division cycle associated 7
ENSG00000163328	2.30302	1.96558	0.514647	3.81928	0.000133844	0.000503018	GPR155	151556	G protein-coupled receptor 155
ENSG00000128655	8.82695	1.37641	0.248933	5.52924	3.22e-08	2.23e-07	PDE11A	50940	phosphodiesterase 11A
ENSG00000079150	9.36944	1.17927	0.246901	4.77629	1.79e-06	9.5e-06	FKBP7	51661	FKBP prolyl isomerase 7
ENSG00000116095	81.0324	0.701042	0.0902918	7.76418	8.22e-15	1.19e-13	PLEKHA3	65977	pleckstrin homology domain containing A3
ENSG00000170035	271.612	0.929296	0.094921	9.79021	1.24e-22	3.4e-21	UBE2E3	10477	ubiquitin conjugating enzyme E2 E3
ENSG00000163002	35.0836	-1.33949	0.214959	-6.23135	4.62e-10	4.05e-09	NUP35	129401	nucleoporin 35
ENSG00000170396	3.71879	2.05471	0.443346	4.63454	3.58e-06	1.82e-05	ZNF804A	91752	zinc finger protein 804A
ENSG00000138449	28.7446	1.35506	0.177066	7.65281	1.97e-14	2.76e-13	SLC40A1	30061	solute carrier family 40 member 1
ENSG00000151689	67.2393	1.41689	0.103977	13.6269	2.77e-42	2.41e-40	INPP1	3628	inositol polyphosphate-1-phosphatase
ENSG00000151690	3.34397	3.76524	0.571661	6.58649	4.5e-11	4.44e-10	MFSD6	54842	major facilitator superfamily domain containing 6
ENSG00000173559	34.231	0.946291	0.126905	7.45667	8.87e-14	1.17e-12	NABP1	64859	nucleic acid binding protein 1
ENSG00000138356	115.226	-0.872323	0.131064	-6.6557	2.82e-11	2.85e-10	AOX1	316	aldehyde oxidase 1
ENSG00000013441	48.7411	-1.24282	0.135464	-9.17452	4.54e-20	9.93e-19	CLK1	1195	CDC like kinase 1
ENSG00000204217	83.3926	0.727554	0.115127	6.31956	2.62e-10	2.36e-09	BMPR2	659	bone morphogenetic protein receptor type 2
ENSG00000116117	60.8393	-2.01223	0.140931	-14.2781	3e-46	3.19e-44	PARD3B	117583	par-3 family cell polarity regulator beta
ENSG00000118257	101.612	0.827217	0.129528	6.38638	1.7e-10	1.56e-09	NRP2	8828	neuropilin 2
ENSG00000138413	602.746	-1.10935	0.104417	-10.6242	2.3e-26	7.96e-25	IDH1	3417	isocitrate dehydrogenase (NADP(+)) 1
ENSG00000231908	12.781	-1.15813	0.245987	-4.7081	2.5e-06	1.3e-05	IDH1-AS1	100507475	IDH1 antisense RNA 1
ENSG00000078018	1.43058	2.78402	0.67286	4.1376	3.51e-05	0.000148482	MAP2	4133	microtubule associated protein 2
ENSG00000260804	8.21017	1.03885	0.267984	3.87653	0.000105959	0.000407594	LINC01963	150967	long intergenic non-protein coding RNA 1963
ENSG00000115457	39.9409	2.78009	0.198834	13.982	2.01e-44	2.04e-42	IGFBP2	3485	insulin like growth factor binding protein 2
ENSG00000115461	15.8195	6.76592	0.658815	10.2698	9.64e-25	3.05e-23	IGFBP5	3488	insulin like growth factor binding protein 5
ENSG00000079308	3.23967	-3.10719	0.704807	-4.40856	1.04e-05	4.85e-05	TNS1	7145	tensin 1
ENSG00000115661	122.065	0.74123	0.0883608	8.38868	4.92e-17	8.67e-16	STK16	8576	serine/threonine kinase 16
ENSG00000127824	78.0614	0.845841	0.102415	8.25898	1.47e-16	2.49e-15	TUBA4A	7277	tubulin alpha 4a
ENSG00000152056	90.0814	1.1445	0.172769	6.62448	3.48e-11	3.47e-10	AP1S3	130340	adaptor related protein complex 1 subunit sigma 3
ENSG00000135919	349.767	2.69055	0.152111	17.6881	5.18e-70	1.62e-67	SERPINE2	5270	serpin family E member 2
ENSG00000236432	2.53809	2.58678	0.53211	4.86137	1.17e-06	6.37e-06	MFF-DT	654841	MFF divergent transcript
ENSG00000135917	10.0428	-5.85715	0.737997	-7.93655	2.08e-15	3.18e-14	SLC19A3	80704	solute carrier family 19 member 3
ENSG00000115009	315.914	-3.87469	0.453059	-8.55228	1.21e-17	2.23e-16	CCL20	6364	C-C motif chemokine ligand 20
ENSG00000153823	6.35488	-2.14082	0.423636	-5.05344	4.34e-07	2.53e-06	PID1	55022	phosphotyrosine interaction domain containing 1
ENSG00000079263	3.40666	2.50748	0.528284	4.74647	2.07e-06	1.09e-05	SP140	11262	SP140 nuclear body protein
ENSG00000067066	32.8602	1.47356	0.156547	9.41288	4.83e-21	1.15e-19	SP100	6672	SP100 nuclear antigen
ENSG00000204128	448.277	-1.07148	0.0856372	-12.5118	6.43e-36	3.71e-34	C2orf72	257407	chromosome 2 open reading frame 72
ENSG00000156966	26.1408	5.46089	0.44707	12.2148	2.59e-34	1.36e-32	B3GNT7	93010	UDP-GlcNAc:betaGal beta-1,3-N-acetylglucosaminyltransferase 7
ENSG00000237412	1.17098	2.65937	0.737364	3.60659	0.000310247	0.00108065	PRSS56	646960	serine protease 56
ENSG00000221944	12.382	0.884535	0.202619	4.36551	1.27e-05	5.81e-05	TIGD1	200765	tigger transposable element derived 1
ENSG00000115468	7.28221	-3.2925	0.558323	-5.89713	3.7e-09	2.87e-08	EFHD1	80303	EF-hand domain family member D1
ENSG00000182600	149.563	1.06044	0.118745	8.9304	4.24e-19	8.77e-18	SNORC	389084	secondary ossification center associated regulator of chondrocyte maturation
ENSG00000222001	9.06137	1.54924	0.257546	6.01538	1.79e-09	1.46e-08	LOC101928881	101928881	uncharacterized LOC101928881
ENSG00000085978	72.4777	0.737926	0.0890286	8.28863	1.15e-16	1.95e-15	ATG16L1	55054	autophagy related 16 like 1
ENSG00000124839	85.0666	1.20203	0.108571	11.0715	1.73e-28	6.63e-27	RAB17	64284	RAB17, member RAS oncogene family
ENSG00000063660	57.923	0.916734	0.159114	5.76151	8.34e-09	6.19e-08	GPC1	2817	glypican 1
ENSG00000172482	26.459	-1.0409	0.226846	-4.58856	4.46e-06	2.23e-05	AGXT	189	alanine--glyoxylate and serine--pyruvate aminotransferase
ENSG00000233392	3.42468	-2.07141	0.544564	-3.8038	0.000142493	0.000533342	LOC200772	200772	uncharacterized LOC200772
ENSG00000150995	17.2742	-1.12866	0.238033	-4.74162	2.12e-06	1.11e-05	ITPR1	3708	inositol 1,4,5-trisphosphate receptor type 1
ENSG00000134107	37.9755	-0.773214	0.199929	-3.86745	0.00010998	0.000421958	BHLHE40	8553	basic helix-loop-helix family member e40
ENSG00000071282	78.3245	1.28809	0.103986	12.3872	3.06e-35	1.69e-33	LMCD1	29995	LIM and cysteine rich domains 1
ENSG00000214021	25.5197	0.848533	0.182188	4.65746	3.2e-06	1.64e-05	TTLL3	26140	tubulin tyrosine ligase like 3
ENSG00000187288	4.43094	2.58595	0.402317	6.42762	1.3e-10	1.21e-09	CIDEC	63924	cell death inducing DFFA like effector c
ENSG00000163704	7.82509	1.01008	0.27793	3.63428	0.000278758	0.000981896	PRRT3	285368	proline rich transmembrane protein 3
ENSG00000197885	15.6003	0.869793	0.202496	4.29535	1.74e-05	7.8e-05	NKIRAS1	28512	NFKB inhibitor interacting Ras like 1
ENSG00000151090	32.4394	-0.980934	0.163823	-5.98778	2.13e-09	1.71e-08	THRB	7068	thyroid hormone receptor beta
ENSG00000033867	205.241	0.911682	0.0675197	13.5025	1.51e-41	1.26e-39	SLC4A7	9497	solute carrier family 4 member 7
ENSG00000163513	108.474	0.849623	0.129684	6.5515	5.7e-11	5.54e-10	TGFBR2	7048	transforming growth factor beta receptor 2
ENSG00000163527	391.131	0.832383	0.0892181	9.32976	1.06e-20	2.46e-19	STT3B	201595	STT3 oligosaccharyltransferase complex catalytic subunit B
ENSG00000093217	27.8222	-1.04964	0.168775	-6.21915	5e-10	4.35e-09	XYLB	9942	xylulokinase
ENSG00000180432	12.1951	-2.09495	0.317277	-6.6029	4.03e-11	3.99e-10	CYP8B1	1582	cytochrome P450 family 8 subfamily B member 1
ENSG00000163808	95.079	-1.03004	0.108716	-9.47459	2.68e-21	6.46e-20	KIF15	56992	kinesin family member 15
ENSG00000163814	13.5891	6.54124	0.571823	11.4393	2.66e-30	1.14e-28	CDCP1	64866	CUB domain containing protein 1
ENSG00000249992	4.62663	1.56563	0.365807	4.27994	1.87e-05	8.31e-05	TMEM158	25907	transmembrane protein 158 (gene/pseudogene)
ENSG00000241186	15.4549	-3.04158	0.3552	-8.563	1.1e-17	2.05e-16	TDGF1	6997	teratocarcinoma-derived growth factor 1
ENSG00000164045	294.091	-0.763887	0.0977477	-7.81488	5.5e-15	8.14e-14	CDC25A	993	cell division cycle 25A
ENSG00000114268	9.74827	-2.09322	0.380825	-5.49653	3.87e-08	2.64e-07	PFKFB4	5210	6-phosphofructo-2-kinase/fructose-2,6-biphosphatase 4
ENSG00000172037	62.1057	0.900196	0.0998675	9.01391	1.99e-19	4.2e-18	LAMB2	3913	laminin subunit beta 2
ENSG00000182179	5.54213	1.15023	0.298642	3.85153	0.00011738	0.000446274	UBA7	7318	ubiquitin like modifier activating enzyme 7
ENSG00000188338	22.6095	-1.41646	0.183556	-7.71679	1.19e-14	1.71e-13	SLC38A3	10991	solute carrier family 38 member 3
ENSG00000145041	50.9457	-0.822809	0.166997	-4.9271	8.35e-07	4.67e-06	DCAF1	9730	DDB1 and CUL4 associated factor 1
ENSG00000041880	27.8471	1.03469	0.171904	6.01898	1.76e-09	1.43e-08	PARP3	10039	poly(ADP-ribose) polymerase family member 3
ENSG00000168301	3.37139	-1.90028	0.510708	-3.72088	0.000198531	0.000722135	KCTD6	200845	potassium channel tetramerization domain containing 6
ENSG00000168306	11.1546	-1.34992	0.264847	-5.097	3.45e-07	2.04e-06	ACOX2	8309	acyl-CoA oxidase 2
ENSG00000151276	214.107	0.762824	0.0679524	11.2259	3.04e-29	1.23e-27	MAGI1	9223	membrane associated guanylate kinase, WW and PDZ domain containing 1
ENSG00000144749	20.8489	-3.62163	0.329536	-10.9901	4.26e-28	1.62e-26	LRIG1	26018	leucine rich repeats and immunoglobulin like domains 1
ENSG00000172340	147	-0.828083	0.124169	-6.66898	2.58e-11	2.61e-10	SUCLG2	8801	succinate-CoA ligase GDP-forming beta subunit
ENSG00000172986	7.17429	-1.41958	0.332642	-4.2676	1.98e-05	8.74e-05	GXYLT2	727936	glucoside xylosyltransferase 2
ENSG00000244026	41.3625	0.744416	0.11532	6.45524	1.08e-10	1.02e-09	FAM86DP	692099	family with sequence similarity 86 member D, pseudogene
ENSG00000178700	20.6591	0.869352	0.157798	5.50926	3.6e-08	2.47e-07	DHFR2	200895	dihydrofolate reductase 2
ENSG00000064225	43.3183	-0.857984	0.129667	-6.61685	3.67e-11	3.65e-10	ST3GAL6	10402	ST3 beta-galactoside alpha-2,3-sialyltransferase 6
ENSG00000057019	668.538	2.77566	0.177829	15.6086	6.36e-55	1.09e-52	DCBLD2	131566	discoidin, CUB and LCCL domain containing 2
ENSG00000144802	11.663	-1.39681	0.282486	-4.94471	7.63e-07	4.29e-06	NFKBIZ	64332	NFKB inhibitor zeta
ENSG00000170017	92.5464	-1.28892	0.0942594	-13.6742	1.45e-42	1.31e-40	ALCAM	214	activated leukocyte cell adhesion molecule
ENSG00000114423	23.9824	1.11349	0.149344	7.45591	8.92e-14	1.17e-12	CBLB	868	Cbl proto-oncogene B
ENSG00000206530	12.0538	1.10751	0.220405	5.02489	5.04e-07	2.92e-06	CFAP44	55779	cilia and flagella associated protein 44
ENSG00000163617	3.73896	1.91111	0.392577	4.86811	1.13e-06	6.17e-06	CCDC191	57577	coiled-coil domain containing 191
ENSG00000181722	38.6051	0.971137	0.165426	5.87054	4.34e-09	3.34e-08	ZBTB20	26137	zinc finger and BTB domain containing 20
ENSG00000163389	67.2752	-1.17416	0.111877	-10.4951	9.1e-26	3.05e-24	POGLUT1	56983	protein O-glucosyltransferase 1
ENSG00000144852	10.1398	1.22974	0.240463	5.11403	3.15e-07	1.88e-06	NR1I2	8856	nuclear receptor subfamily 1 group I member 2
ENSG00000144840	28.8379	-0.914725	0.152288	-6.00656	1.89e-09	1.53e-08	RABL3	285282	RAB, member of RAS oncogene family like 3
ENSG00000196981	8.09963	1.32851	0.261926	5.07207	3.94e-07	2.32e-06	WDR5B	54554	WD repeat domain 5B
ENSG00000173193	62.4114	0.976364	0.117584	8.30352	1.01e-16	1.74e-15	PARP14	54625	poly(ADP-ribose) polymerase family member 14
ENSG00000169087	6.1882	1.32186	0.291882	4.52874	5.93e-06	2.9e-05	HSPBAP1	79663	HSPB1 associated protein 1
ENSG00000160145	48.72	1.20308	0.140801	8.54456	1.29e-17	2.38e-16	KALRN	8997	kalirin RhoGEF kinase
ENSG00000082781	742.952	1.17021	0.0539589	21.687	2.72e-104	2.11e-101	ITGB5	3693	integrin subunit beta 5
ENSG00000173702	2.30312	3.619	0.62687	5.77313	7.78e-09	5.82e-08	MUC13	56667	mucin 13, cell surface associated
ENSG00000173706	100.123	-0.799166	0.097662	-8.18298	2.77e-16	4.61e-15	HEG1	57493	heart development protein with EGF like domains 1
ENSG00000144908	12.8864	-2.95193	0.341114	-8.65379	4.98e-18	9.51e-17	ALDH1L1	10840	aldehyde dehydrogenase 1 family member L1
ENSG00000163884	4.20487	-1.87258	0.455762	-4.10869	3.98e-05	0.000166812	KLF15	28999	Kruppel like factor 15
ENSG00000180767	140.298	-1.66864	0.105836	-15.7663	5.31e-56	9.52e-54	CHST13	166012	carbohydrate sulfotransferase 13
ENSG00000073111	206.756	-0.813957	0.0834972	-9.74831	1.88e-22	5.02e-21	MCM2	4171	minichromosome maintenance complex component 2
ENSG00000114626	3.42068	2.40388	0.473059	5.08157	3.74e-07	2.21e-06	ABTB1	80325	ankyrin repeat and BTB domain containing 1
ENSG00000251474	22.2336	0.828989	0.155593	5.32792	9.93e-08	6.39e-07	RPL32P3	132241	ribosomal protein L32 pseudogene 3
ENSG00000172771	5.0546	2.6661	0.400806	6.65184	2.89e-11	2.91e-10	EFCAB12	90288	EF-hand calcium binding domain 12
ENSG00000271270	7.02236	1.44498	0.277277	5.21132	1.88e-07	1.16e-06	TMCC1-AS1	100507032	TMCC1 antisense RNA 1 (head to head)
ENSG00000034533	5.6458	-1.38677	0.361226	-3.83907	0.000123503	0.000467157	ASTE1	28990	asteroid homolog 1
ENSG00000113971	21.3989	0.761577	0.160854	4.73459	2.19e-06	1.15e-05	NPHP3	27031	nephrocystin 3
ENSG00000091513	1704.42	-1.81696	0.129557	-14.0244	1.11e-44	1.15e-42	TF	7018	transferrin
ENSG00000154928	16.2913	5.86074	0.481464	12.1727	4.34e-34	2.25e-32	EPHB1	2047	EPH receptor B1
ENSG00000114054	42.7791	-0.756049	0.134902	-5.60445	2.09e-08	1.48e-07	PCCB	5096	propionyl-CoA carboxylase subunit beta
ENSG00000158220	5.10397	-1.58103	0.411386	-3.84319	0.000121445	0.0004603	ESYT3	83850	extended synaptotagmin 3
ENSG00000158234	31.0986	-0.808054	0.154473	-5.23102	1.69e-07	1.05e-06	FAIM	55179	Fas apoptotic inhibitory molecule
ENSG00000114113	1.07536	2.5467	0.765264	3.32788	0.000875101	0.00276698	RBP2	5948	retinol binding protein 2
ENSG00000114115	209.5	3.08259	0.36586	8.42559	3.59e-17	6.37e-16	RBP1	5947	retinol binding protein 1
ENSG00000163864	5.10511	1.55655	0.328248	4.74199	2.12e-06	1.11e-05	NMNAT3	349565	nicotinamide nucleotide adenylyltransferase 3
ENSG00000155893	11.1585	-1.03932	0.244113	-4.25754	2.07e-05	9.11e-05	PXYLP1	92370	2-phosphoxylose phosphatase 1
ENSG00000188582	20.3175	-3.27863	0.345453	-9.49083	2.29e-21	5.59e-20	PAQR9	344838	progestin and adipoQ receptor family member 9
ENSG00000241570	2.30755	-2.58994	0.759921	-3.40817	0.000653997	0.00212311	PAQR9-AS1	101927832	PAQR9 antisense RNA 1
ENSG00000047457	397.672	-1.56778	0.221939	-7.06402	1.62e-12	1.85e-11	CP	1356	ceruloplasmin
ENSG00000169908	2368.74	1.11569	0.061959	18.007	1.72e-72	5.62e-70	TM4SF1	4071	transmembrane 4 L six family member 1
ENSG00000114744	64.8211	-0.903213	0.122805	-7.35487	1.91e-13	2.4e-12	COMMD2	51122	COMM domain containing 2
ENSG00000174928	11.9185	-1.18673	0.274829	-4.31806	1.57e-05	7.11e-05	C3orf33	285315	chromosome 3 open reading frame 33
ENSG00000085276	5.75642	5.92447	0.583496	10.1534	3.2e-24	9.7e-23	MECOM	2122	MDS1 and EVI1 complex locus
ENSG00000085274	16.3576	0.705298	0.182849	3.85726	0.000114666	0.000437086	MYNN	55892	myoneurin
ENSG00000008952	533.016	0.746902	0.0593169	12.5917	2.34e-36	1.41e-34	SEC62	7095	SEC62 homolog, preprotein translocation factor
ENSG00000173890	27.4403	0.984157	0.148351	6.63396	3.27e-11	3.27e-10	GPR160	26996	G protein-coupled receptor 160
ENSG00000013297	14.8772	2.67392	0.394927	6.77069	1.28e-11	1.33e-10	CLDN11	5010	claudin 11
ENSG00000154310	11.6634	0.881561	0.210785	4.18228	2.89e-05	0.00012381	TNIK	23043	TRAF2 and NCK interacting kinase
ENSG00000075651	80.3702	0.714319	0.0978614	7.29929	2.89e-13	3.57e-12	PLD1	5337	phospholipase D1
ENSG00000114796	24.4607	2.15027	0.16934	12.6979	6.07e-37	3.88e-35	KLHL24	54800	kelch like family member 24
ENSG00000163888	1.7527	1.91551	0.578172	3.31305	0.000922838	0.00290481	CAMK2N2	94032	calcium/calmodulin dependent protein kinase II inhibitor 2
ENSG00000113790	51.771	-1.26291	0.140828	-8.96779	3.03e-19	6.29e-18	EHHADH	1962	enoyl-CoA hydratase and 3-hydroxyacyl CoA dehydrogenase
ENSG00000163898	2.41374	3.6784	0.625409	5.88159	4.06e-09	3.14e-08	LIPH	200879	lipase H
ENSG00000136527	301.846	-0.773222	0.069367	-11.1468	7.42e-29	2.93e-27	TRA2B	6434	transformer 2 beta homolog
ENSG00000113889	15.5633	-1.69229	0.244352	-6.92562	4.34e-12	4.74e-11	KNG1	3827	kininogen 1
ENSG00000127241	8.16365	2.65194	0.313785	8.45143	2.88e-17	5.13e-16	MASP1	5648	mannan binding lectin serine peptidase 1
ENSG00000163347	219.036	-1.08817	0.115664	-9.40806	5.05e-21	1.2e-19	CLDN1	9076	claudin 1
ENSG00000196083	29.1813	-1.0313	0.168589	-6.11728	9.52e-10	8.01e-09	IL1RAP	3556	interleukin 1 receptor accessory protein
ENSG00000180611	2.6399	-2.7834	0.719051	-3.87094	0.000108415	0.000416279	MB21D2	151963	Mab-21 domain containing 2
ENSG00000178772	23.4863	-1.26099	0.176524	-7.14346	9.1e-13	1.05e-11	CPN2	1370	carboxypeptidase N subunit 2
ENSG00000185112	45.2979	0.769269	0.139882	5.4994	3.81e-08	2.6e-07	FAM43A	131583	family with sequence similarity 43 member A
ENSG00000184203	125.392	0.869461	0.0935784	9.29126	1.52e-20	3.48e-19	PPP1R2	5504	protein phosphatase 1 regulatory inhibitor subunit 2
ENSG00000163959	5.43247	-2.30499	0.517845	-4.45113	8.54e-06	4.05e-05	SLC51A	200931	solute carrier family 51 alpha subunit
ENSG00000213123	8.97599	1.03596	0.242747	4.26766	1.98e-05	8.74e-05	TCTEX1D2	255758	Tctex1 domain containing 2
ENSG00000145214	39.7992	0.741744	0.153829	4.82186	1.42e-06	7.7e-06	DGKQ	1609	diacylglycerol kinase theta
ENSG00000145217	29.3327	-1.70714	0.179976	-9.48536	2.42e-21	5.84e-20	SLC26A1	10861	solute carrier family 26 member 1
ENSG00000249784	63.1208	-0.916141	0.156463	-5.8553	4.76e-09	3.65e-08	SCARNA22	677770	small Cajal body-specific RNA 22
ENSG00000159733	1.10144	2.58602	0.723831	3.57269	0.000353338	0.00121833	ZFYVE28	57732	zinc finger FYVE-type containing 28
ENSG00000186222	90.3175	-0.860609	0.103825	-8.289	1.14e-16	1.95e-15	BLOC1S4	55330	biogenesis of lysosomal organelles complex 1 subunit 4
ENSG00000173011	18.8757	-0.701895	0.185951	-3.77462	0.000160251	0.000595114	TADA2B	93624	transcriptional adaptor 2B
ENSG00000109667	14.6233	-1.42393	0.23677	-6.01396	1.81e-09	1.47e-08	SLC2A9	56606	solute carrier family 2 member 9
ENSG00000048342	3.0729	-4.10374	0.78321	-5.23965	1.61e-07	1.01e-06	CC2D2A	57545	coiled-coil and C2 domain containing 2A
ENSG00000237765	22.5551	0.712846	0.159053	4.48182	7.4e-06	3.55e-05	FAM200B	285550	family with sequence similarity 200 member B
ENSG00000007062	9.80414	1.50123	0.266412	5.63501	1.75e-08	1.25e-07	PROM1	8842	prominin 1
ENSG00000109819	35.2384	-0.752291	0.16117	-4.66769	3.05e-06	1.56e-05	PPARGC1A	10891	PPARG coactivator 1 alpha
ENSG00000091490	14.9704	1.28739	0.219116	5.87536	4.22e-09	3.25e-08	SEL1L3	23231	SEL1L family member 3
ENSG00000121895	6.6263	4.0968	0.45459	9.01207	2.02e-19	4.26e-18	TMEM156	80008	transmembrane protein 156
ENSG00000134962	176.221	-2.58687	0.11419	-22.6541	1.27e-113	1.17e-110	KLB	152831	klotho beta
ENSG00000109814	762.83	-0.869834	0.0713391	-12.193	3.39e-34	1.77e-32	UGDH	7358	UDP-glucose 6-dehydrogenase
ENSG00000163683	119.583	0.973869	0.10623	9.16758	4.84e-20	1.05e-18	SMIM14	201895	small integral membrane protein 14
ENSG00000078177	46.0704	-0.732977	0.135421	-5.41257	6.21e-08	4.11e-07	N4BP2	55728	NEDD4 binding protein 2
ENSG00000163694	5.34428	1.36533	0.322727	4.2306	2.33e-05	0.000101826	RBM47	54502	RNA binding motif protein 47
ENSG00000163697	48.105	-0.89052	0.121522	-7.32804	2.34e-13	2.91e-12	APBB2	323	amyloid beta precursor protein binding family B member 2
ENSG00000169019	18.127	-0.760054	0.201337	-3.77503	0.000159986	0.000594281	COMMD8	54951	COMM domain containing 8
ENSG00000163293	6.41105	-1.56254	0.365124	-4.27947	1.87e-05	8.33e-05	NIPAL1	152519	NIPA like domain containing 1
ENSG00000163069	13.5745	-1.43811	0.249661	-5.76027	8.4e-09	6.23e-08	SGCB	6443	sarcoglycan beta
ENSG00000226950	153.869	-0.769336	0.101462	-7.58254	3.39e-14	4.64e-13	DANCR	57291	differentiation antagonizing non-protein coding RNA
ENSG00000109220	14.6363	0.808517	0.196176	4.12138	3.77e-05	0.00015833	CHIC2	26511	cysteine rich hydrophobic domain 2
ENSG00000174799	36.2735	-0.910439	0.143748	-6.33356	2.4e-10	2.17e-09	CEP135	9662	centrosomal protein 135
ENSG00000163453	62.6699	2.23401	0.169161	13.2064	8.06e-40	6.02e-38	IGFBP7	3490	insulin like growth factor binding protein 7
ENSG00000109181	56.1616	-1.93171	0.177358	-10.8916	1.26e-27	4.74e-26	UGT2B10	7365	UDP glucuronosyltransferase family 2 member B10
ENSG00000251685	7.19275	-1.69533	0.374077	-4.53204	5.84e-06	2.86e-05	LOC101929773	101929773	UDP-glucuronosyltransferase 2B10-like
ENSG00000126550	6.24367	6.25659	0.714113	8.76134	1.93e-18	3.78e-17	HTN1	3346	histatin 1
ENSG00000109205	26.9624	1.58912	0.179982	8.82933	1.05e-18	2.1e-17	ODAM	54959	odontogenic, ameloblast associated
ENSG00000163631	2258.13	-1.37341	0.252975	-5.42904	5.67e-08	3.76e-07	ALB	213	albumin
ENSG00000081051	2794.07	-1.68344	0.111306	-15.1245	1.12e-51	1.64e-49	AFP	174	alpha fetoprotein
ENSG00000169435	1.16392	2.42675	0.726933	3.33835	0.000842781	0.00267341	RASSF6	166824	Ras association domain family member 6
ENSG00000169429	15.3918	4.25763	0.352347	12.0836	1.29e-33	6.49e-32	CXCL8	3576	C-X-C motif chemokine ligand 8
ENSG00000124882	6.60471	3.62414	0.419301	8.64328	5.46e-18	1.04e-16	EREG	2069	epiregulin
ENSG00000109321	2.33599	2.94251	0.6132	4.79862	1.6e-06	8.58e-06	AREG	374	amphiregulin
ENSG00000138744	35.2754	-1.345	0.154554	-8.70242	3.25e-18	6.31e-17	NAAA	27163	N-acylethanolamine acid amidase
ENSG00000138760	97.9079	0.765148	0.0892266	8.57534	9.88e-18	1.85e-16	SCARB2	950	scavenger receptor class B member 2
ENSG00000138758	374.455	-0.89266	0.0707933	-12.6094	1.87e-36	1.14e-34	SEPTIN11	55752	septin 11
ENSG00000138772	14.513	0.928793	0.205502	4.51963	6.19e-06	3.01e-05	ANXA3	306	annexin A3
ENSG00000163297	6.54577	1.56217	0.311781	5.01048	5.43e-07	3.13e-06	ANTXR2	118429	ANTXR cell adhesion molecule 2
ENSG00000251022	17.1206	0.811396	0.188138	4.31277	1.61e-05	7.28e-05	THAP9-AS1	100499177	THAP9 antisense RNA 1
ENSG00000189308	83.6861	-1.18417	0.221331	-5.35025	8.78e-08	5.69e-07	LIN54	132660	lin-54 DREAM MuvB core complex component
ENSG00000138663	21.0336	-0.894056	0.17437	-5.12736	2.94e-07	1.76e-06	COPS4	51138	COP9 signalosome subunit 4
ENSG00000145287	41.4791	0.702183	0.175325	4.00503	6.2e-05	0.00025128	PLAC8	51316	placenta associated 8
ENSG00000163625	19.9912	-1.5814	0.203609	-7.76685	8.05e-15	1.17e-13	WDFY3	23001	WD repeat and FYVE domain containing 3
ENSG00000163633	15.0552	1.27787	0.188164	6.79127	1.11e-11	1.16e-10	C4orf36	132989	chromosome 4 open reading frame 36
ENSG00000118777	34.4212	-2.14175	0.1744	-12.2806	1.15e-34	6.15e-33	ABCG2	9429	ATP binding cassette subfamily G member 2 (Junior blood group)
ENSG00000168785	23.076	4.7257	0.442761	10.6733	1.36e-26	4.74e-25	TSPAN5	10098	tetraspanin 5
ENSG00000198099	42.2789	-1.80238	0.148762	-12.1159	8.7e-34	4.44e-32	ADH4	127	alcohol dehydrogenase 4 (class II), pi polypeptide
ENSG00000172955	79.5634	-0.926168	0.105672	-8.76456	1.88e-18	3.68e-17	ADH6	130	alcohol dehydrogenase 6 (class V)
ENSG00000145331	20.7125	-1.38106	0.194071	-7.11626	1.11e-12	1.28e-11	TRMT10A	93587	tRNA methyltransferase 10A
ENSG00000138823	93.1678	-0.903201	0.136306	-6.62629	3.44e-11	3.43e-10	MTTP	4547	microsomal triglyceride transfer protein
ENSG00000254531	5.01791	1.67137	0.33909	4.92897	8.27e-07	4.63e-06	FLJ20021	90024	uncharacterized LOC90024
ENSG00000164023	1.50338	3.16853	0.66309	4.77843	1.77e-06	9.41e-06	SGMS2	166929	sphingomyelin synthase 2
ENSG00000138796	89.9139	-0.857075	0.100005	-8.57031	1.03e-17	1.93e-16	HADH	3033	hydroxyacyl-CoA dehydrogenase
ENSG00000138795	1.8405	2.14377	0.586631	3.65438	0.000257807	0.000914316	LEF1	51176	lymphoid enhancer binding factor 1
ENSG00000170522	84.3479	-1.22706	0.122733	-9.99782	1.56e-23	4.46e-22	ELOVL6	79071	ELOVL fatty acid elongase 6
ENSG00000174749	5.48471	2.10713	0.358506	5.87752	4.16e-09	3.21e-08	FAM241A	132720	family with sequence similarity 241 member A
ENSG00000164096	189.651	-0.795854	0.127544	-6.23985	4.38e-10	3.85e-09	C4orf3	401152	chromosome 4 open reading frame 3
ENSG00000138735	3.13077	2.57789	0.456445	5.64776	1.63e-08	1.17e-07	PDE5A	8654	phosphodiesterase 5A
ENSG00000145386	173.717	-0.822489	0.0777352	-10.5807	3.66e-26	1.26e-24	CCNA2	890	cyclin A2
ENSG00000164056	101.73	1.10711	0.120222	9.20882	3.3e-20	7.32e-19	SPRY1	10252	sprouty RTK signaling antagonist 1
ENSG00000249464	9.69628	2.01906	0.254067	7.94693	1.91e-15	2.94e-14	LINC01091	285419	long intergenic non-protein coding RNA 1091
ENSG00000142731	29.739	-1.22093	0.182087	-6.70517	2.01e-11	2.05e-10	PLK4	10733	polo like kinase 4
ENSG00000077684	86.1352	-0.754756	0.10372	-7.2769	3.42e-13	4.17e-12	JADE1	79960	jade family PHD finger 1
ENSG00000145391	5.34946	2.75131	0.398756	6.89974	5.21e-12	5.64e-11	SETD7	80854	SET domain containing 7, histone lysine methyltransferase
ENSG00000196782	2.54517	4.69491	0.632516	7.42259	1.15e-13	1.48e-12	MAML3	55534	mastermind like transcriptional coactivator 3
ENSG00000164167	34.1249	-0.757937	0.146683	-5.16719	2.38e-07	1.45e-06	LSM6	11157	LSM6 homolog, U6 small nuclear RNA and mRNA degradation associated
ENSG00000120519	13.1332	-2.02012	0.282482	-7.15134	8.59e-13	9.97e-12	SLC10A7	84068	solute carrier family 10 member 7
ENSG00000071205	2.20448	1.73641	0.500984	3.46601	0.000528249	0.00175201	ARHGAP10	79658	Rho GTPase activating protein 10
ENSG00000109654	5.28008	1.42534	0.309634	4.60332	4.16e-06	2.09e-05	TRIM2	23321	tripartite motif containing 2
ENSG00000121211	94.5021	-0.993052	0.094818	-10.4732	1.15e-25	3.82e-24	MND1	84057	meiotic nuclear divisions 1
ENSG00000164125	331.482	0.992442	0.145545	6.81881	9.18e-12	9.73e-11	GASK1B	51313	golgi associated kinase 1B
ENSG00000171503	9.62087	-0.886141	0.254095	-3.48744	0.000487668	0.00163066	ETFDH	2110	electron transfer flavoprotein dehydrogenase
ENSG00000052802	174.791	-1.52218	0.1099	-13.8506	1.26e-43	1.2e-41	MSMO1	6307	methylsterol monooxygenase 1
ENSG00000129116	35.6627	3.02523	0.159922	18.9169	8.28e-80	3.69e-77	PALLD	23022	palladin, cytoskeletal associated protein
ENSG00000154447	61.8152	1.54052	0.120339	12.8015	1.61e-37	1.07e-35	SH3RF1	57630	SH3 domain containing ring finger 1
ENSG00000109572	108.836	0.754966	0.100386	7.52062	5.45e-14	7.33e-13	CLCN3	1182	chloride voltage-gated channel 3
ENSG00000164104	348.446	-0.900987	0.0970468	-9.28404	1.63e-20	3.72e-19	HMGB2	3148	high mobility group box 2
ENSG00000151718	155.81	-0.816539	0.0824437	-9.9042	3.99e-23	1.12e-21	WWC2	80014	WW and C2 domain containing 2
ENSG00000151726	23.8466	-0.805839	0.190888	-4.22152	2.43e-05	0.000105643	ACSL1	2180	acyl-CoA synthetase long chain family member 1
ENSG00000186352	10.9614	-1.67233	0.291722	-5.73262	9.89e-09	7.29e-08	ANKRD37	353322	ankyrin repeat domain 37
ENSG00000109775	48.5755	-0.702988	0.127263	-5.52391	3.32e-08	2.29e-07	UFSP2	55325	UFM1 specific peptidase 2
ENSG00000088926	29.3461	-1.23922	0.155722	-7.95789	1.75e-15	2.71e-14	F11	2160	coagulation factor XI
ENSG00000083857	168.894	1.016	0.100463	10.1132	4.83e-24	1.45e-22	FAT1	2195	FAT atypical cadherin 1
ENSG00000071539	39.6685	-0.933217	0.149789	-6.23023	4.66e-10	4.08e-09	TRIP13	9319	thyroid hormone receptor interactor 13
ENSG00000164362	7.51082	-1.30533	0.304035	-4.29334	1.76e-05	7.86e-05	TERT	7015	telomerase reverse transcriptase
ENSG00000145555	153.344	-1.40179	0.0857099	-16.3551	4e-60	9.06e-58	MYO10	4651	myosin X
ENSG00000113494	6.92744	-2.68085	0.431349	-6.21503	5.13e-10	4.46e-09	PRLR	5618	prolactin receptor
ENSG00000145604	76.2424	-1.46508	0.143134	-10.2357	1.37e-24	4.31e-23	SKP2	6502	S-phase kinase associated protein 2
ENSG00000152620	97.057	-1.00102	0.109108	-9.17458	4.53e-20	9.93e-19	NADK2	133686	NAD kinase 2, mitochondrial
ENSG00000168621	16.2014	4.19184	0.296459	14.1397	2.16e-45	2.27e-43	GDNF	2668	glial cell derived neurotrophic factor
ENSG00000113594	52.7271	-0.837156	0.140237	-5.96958	2.38e-09	1.9e-08	LIFR	3977	LIF receptor subunit alpha
ENSG00000153071	71.3841	1.55629	0.148011	10.5147	7.39e-26	2.49e-24	DAB2	1601	DAB adaptor protein 2
ENSG00000112936	4.17158	5.43996	0.615541	8.83768	9.77e-19	1.96e-17	C7	730	complement C7
ENSG00000250722	807.274	-1.12513	0.139826	-8.04666	8.51e-16	1.35e-14	SELENOP	6414	selenoprotein P
ENSG00000112972	859.864	-1.84295	0.111894	-16.4705	5.98e-61	1.42e-58	HMGCS1	3157	3-hydroxy-3-methylglutaryl-CoA synthase 1
ENSG00000172244	3.82732	-1.72267	0.475141	-3.6256	0.000288286	0.00101255	C5orf34	375444	chromosome 5 open reading frame 34
ENSG00000213949	112.8	1.5316	0.0924866	16.5602	1.35e-61	3.31e-59	ITGA1	3672	integrin subunit alpha 1
ENSG00000164171	246.663	1.74753	0.106792	16.3639	3.46e-60	7.96e-58	ITGA2	3673	integrin subunit alpha 2
ENSG00000134363	169.915	-1.53158	0.137386	-11.148	7.33e-29	2.9e-27	FST	10468	follistatin
ENSG00000067113	7.85974	-2.75681	0.413891	-6.66072	2.72e-11	2.76e-10	PLPP1	8611	phospholipid phosphatase 1
ENSG00000152931	20.2432	1.44763	0.189176	7.65232	1.97e-14	2.76e-13	PART1	25859	prostate androgen-regulated transcript 1
ENSG00000049167	20.9738	-1.0283	0.17864	-5.75629	8.6e-09	6.37e-08	ERCC8	1161	ERCC excision repair 8, CSA ubiquitin ligase complex subunit
ENSG00000153006	152.591	0.728794	0.0829855	8.78218	1.6e-18	3.16e-17	SREK1IP1	285672	SREK1 interacting protein 1
ENSG00000049192	16.4466	1.42952	0.187123	7.63948	2.18e-14	3.04e-13	ADAMTS6	11174	ADAM metallopeptidase with thrombospondin type 1 motif 6
ENSG00000069020	56.6706	1.30567	0.116599	11.198	4.17e-29	1.67e-27	MAST4	375449	microtubule associated serine/threonine kinase family member 4
ENSG00000145736	36.3592	-0.84687	0.20974	-4.03771	5.4e-05	0.000221292	GTF2H2	2966	general transcription factor IIH subunit 2
ENSG00000113161	265.501	-1.40636	0.0919417	-15.2962	8.11e-53	1.26e-50	HMGCR	3156	3-hydroxy-3-methylglutaryl-CoA reductase
ENSG00000181104	28.9213	0.868192	0.138494	6.26881	3.64e-10	3.22e-09	F2R	2149	coagulation factor II thrombin receptor
ENSG00000164251	9.23666	1.66697	0.295449	5.64215	1.68e-08	1.21e-07	F2RL1	2150	F2R like trypsin receptor 1
ENSG00000132846	40.8421	-0.724893	0.131393	-5.517	3.45e-08	2.38e-07	ZBED3	84327	zinc finger BED-type containing 3
ENSG00000113231	1.08133	3.68034	0.904203	4.07026	4.7e-05	0.000194485	PDE8B	8622	phosphodiesterase 8B
ENSG00000245556	13.0823	0.979696	0.208064	4.70864	2.49e-06	1.3e-05	SCAMP1-AS1	728769	SCAMP1 antisense RNA 1
ENSG00000113273	79.2722	-1.07109	0.302356	-3.54249	0.000396375	0.0013487	ARSB	411	arylsulfatase B
ENSG00000132840	84.4868	-1.14233	0.0993729	-11.4954	1.39e-30	6.13e-29	BHMT2	23743	betaine--homocysteine S-methyltransferase 2
ENSG00000152409	28.0855	0.720317	0.153374	4.69647	2.65e-06	1.37e-05	JMY	133746	junction mediating and regulatory protein, p53 cofactor
ENSG00000164300	7.09754	-1.23645	0.315042	-3.9247	8.68e-05	0.000340176	SERINC5	256987	serine incorporator 5
ENSG00000113319	208.769	1.05325	0.0803242	13.1124	2.79e-39	2.02e-37	RASGRF2	5924	Ras protein specific guanine nucleotide releasing factor 2
ENSG00000152348	38.4261	1.01331	0.149486	6.77865	1.21e-11	1.26e-10	ATG10	83734	autophagy related 10
ENSG00000205464	41.8376	1.73758	0.19504	8.90883	5.16e-19	1.05e-17	ATP6AP1L	92270	ATPase H+ transporting accessory protein 1 like
ENSG00000038427	103.747	3.00389	0.547636	5.48519	4.13e-08	2.8e-07	VCAN	1462	versican
ENSG00000247828	15.5545	0.993198	0.182022	5.45647	4.86e-08	3.27e-07	TMEM161B-AS1	100505894	TMEM161B antisense RNA 1
ENSG00000237187	3.89826	2.32075	0.414578	5.59786	2.17e-08	1.54e-07	NR2F1-AS1	441094	NR2F1 antisense RNA 1
ENSG00000164292	133.175	1.99834	0.118001	16.9349	2.49e-64	6.41e-62	RHOBTB3	22836	Rho related BTB domain containing 3
ENSG00000173221	37.5728	1.67128	0.139833	11.952	6.34e-33	3.05e-31	GLRX	2745	glutaredoxin
ENSG00000145730	67.3802	0.770357	0.10693	7.20429	5.83e-13	6.94e-12	PAM	5066	peptidylglycine alpha-amidating monooxygenase
ENSG00000164211	37.0642	-1.02093	0.167841	-6.08272	1.18e-09	9.82e-09	STARD4	134429	StAR related lipid transfer domain containing 4
ENSG00000171444	17.5747	-1.24494	0.286037	-4.35239	1.35e-05	6.15e-05	MCC	4163	MCC regulator of WNT signaling pathway
ENSG00000164221	14.6699	-0.998307	0.231894	-4.30501	1.67e-05	7.5e-05	CCDC112	153733	coiled-coil domain containing 112
ENSG00000145781	25.2377	-1.10184	0.187119	-5.88845	3.9e-09	3.02e-08	COMMD10	51397	COMM domain containing 10
ENSG00000145779	63.5419	0.966801	0.111851	8.64364	5.44e-18	1.04e-16	TNFAIP8	25816	TNF alpha induced protein 8
ENSG00000133835	184.617	-0.940674	0.0886452	-10.6117	2.63e-26	9.08e-25	HSD17B4	3295	hydroxysteroid 17-beta dehydrogenase 4
ENSG00000113083	31.7233	-3.41324	0.499929	-6.82745	8.64e-12	9.16e-11	LOX	4015	lysyl oxidase
ENSG00000168938	37.3446	0.716653	0.144858	4.94727	7.53e-07	4.24e-06	PPIC	5480	peptidylprolyl isomerase C
ENSG00000168916	15.704	1.53937	0.205798	7.48004	7.43e-14	9.83e-13	ZNF608	57507	zinc finger protein 608
ENSG00000155324	12.7058	1.06761	0.214247	4.98308	6.26e-07	3.57e-06	GRAMD2B	65983	GRAM domain containing 2B
ENSG00000113368	436.384	-0.735687	0.081936	-8.9788	2.74e-19	5.72e-18	LMNB1	4001	lamin B1
ENSG00000245937	18.4313	0.966994	0.176265	5.48603	4.11e-08	2.79e-07	LINC01184	644873	long intergenic non-protein coding RNA 1184
ENSG00000064651	88.3594	1.6178	0.0895199	18.0719	5.3e-73	1.86e-70	SLC12A2	6558	solute carrier family 12 member 2
ENSG00000066583	61.6489	-1.15756	0.141586	-8.17568	2.94e-16	4.87e-15	ISOC1	51015	isochorismatase domain containing 1
ENSG00000158987	10.2016	-0.991205	0.249418	-3.97408	7.07e-05	0.000282959	RAPGEF6	51735	Rap guanine nucleotide exchange factor 6
ENSG00000131435	4.48113	1.8925	0.437432	4.32638	1.52e-05	6.86e-05	PDLIM4	8572	PDZ and LIM domain 4
ENSG00000164406	74.2065	-1.55157	0.222424	-6.97571	3.04e-12	3.36e-11	LEAP2	116842	liver enriched antimicrobial peptide 2
ENSG00000043143	12.3878	0.755465	0.208775	3.61855	0.000296256	0.00103732	JADE2	23338	jade family PHD finger 2
ENSG00000113621	71.3251	-0.894284	0.105637	-8.46563	2.55e-17	4.56e-16	TXNDC15	79770	thioredoxin domain containing 15
ENSG00000112984	73.5384	-0.875901	0.146943	-5.9608	2.51e-09	2e-08	KIF20A	10112	kinesin family member 20A
ENSG00000120738	115.095	3.39848	0.141541	24.0105	2.16e-127	2.64e-124	EGR1	1958	early growth response 1
ENSG00000249751	1.12229	3.17407	0.709356	4.47458	7.66e-06	3.67e-05	ECSCR	641700	endothelial cell surface expressed chemotaxis and apoptosis regulator
ENSG00000171604	133.107	-0.738709	0.100474	-7.35225	1.95e-13	2.44e-12	CXXC5	51523	CXXC finger protein 5
ENSG00000170458	6.01022	-2.6113	0.487444	-5.35712	8.46e-08	5.49e-07	CD14	929	CD14 molecule
ENSG00000112855	47.647	0.94332	0.131273	7.18593	6.67e-13	7.88e-12	HARS2	23438	histidyl-tRNA synthetase 2, mitochondrial
ENSG00000197948	49.0824	0.760531	0.124709	6.09843	1.07e-09	8.98e-09	FCHSD1	89848	FCH and double SH3 domains 1
ENSG00000120318	2.80919	4.63254	0.620009	7.47173	7.91e-14	1.04e-12	ARAP3	64411	ArfGAP with RhoGAP domain, ankyrin repeat and PH domain 3
ENSG00000156453	8.57163	4.63039	0.47452	9.75805	1.7e-22	4.59e-21	PCDH1	5097	protocadherin 1
ENSG00000013561	41.9691	0.76557	0.129113	5.92948	3.04e-09	2.39e-08	RNF14	9604	ring finger protein 14
ENSG00000187678	17.9905	1.71448	0.186975	9.16959	4.75e-20	1.04e-18	SPRY4	81848	sprouty RTK signaling antagonist 4
ENSG00000231185	5.29864	1.18391	0.315861	3.74819	0.000178114	0.000656313	SPRY4-AS1	101926941	SPRY4 antisense RNA 1
ENSG00000156475	1.6405	4.05517	0.684135	5.92744	3.08e-09	2.42e-08	PPP2R2B	5521	protein phosphatase 2 regulatory subunit Bbeta
ENSG00000113657	9.74713	4.82608	0.494914	9.75136	1.82e-22	4.89e-21	DPYSL3	1809	dihydropyrimidinase like 3
ENSG00000164266	17.6621	4.80302	0.329065	14.596	2.98e-48	3.62e-46	SPINK1	6690	serine peptidase inhibitor, Kazal type 1
ENSG00000173210	16.9437	3.49984	0.250541	13.9692	2.4e-44	2.39e-42	ABLIM3	22885	actin binding LIM protein family member 3
ENSG00000155846	10.1673	-4.32674	0.573134	-7.54927	4.38e-14	5.92e-13	PPARGC1B	133522	PPARG coactivator 1 beta
ENSG00000155850	69.8703	0.770252	0.118085	6.52288	6.9e-11	6.63e-10	SLC26A2	1836	solute carrier family 26 member 2
ENSG00000113721	5.20002	-3.56243	0.639919	-5.567	2.59e-08	1.82e-07	PDGFRB	5159	platelet derived growth factor receptor beta
ENSG00000183876	97.9343	3.83655	0.376707	10.1844	2.33e-24	7.13e-23	ARSI	340075	arylsulfatase family member I
ENSG00000019582	22.6317	1.69484	0.188591	8.98686	2.54e-19	5.33e-18	CD74	972	CD74 molecule
ENSG00000070614	163.163	-0.734566	0.0865234	-8.48979	2.07e-17	3.74e-16	NDST1	3340	N-deacetylase and N-sulfotransferase 1
ENSG00000211445	73.562	-1.67902	0.22971	-7.30929	2.69e-13	3.32e-12	GPX3	2878	glutathione peroxidase 3
ENSG00000197043	174.038	-1.51956	0.12398	-12.2565	1.55e-34	8.17e-33	ANXA6	309	annexin A6
ENSG00000198624	108.458	-0.958513	0.115082	-8.32897	8.15e-17	1.41e-15	CCDC69	26112	coiled-coil domain containing 69
ENSG00000113140	79.574	3.72277	0.166524	22.3558	1.06e-110	9.18e-108	SPARC	6678	secreted protein acidic and cysteine rich
ENSG00000164574	52.0459	1.35158	0.111793	12.09	1.19e-33	6.05e-32	GALNT10	55568	polypeptide N-acetylgalactosaminyltransferase 10
ENSG00000135074	32.8472	4.0446	0.378898	10.6746	1.34e-26	4.68e-25	ADAM19	8728	ADAM metallopeptidase domain 19
ENSG00000155858	50.8094	-1.20721	0.123837	-9.74836	1.87e-22	5.02e-21	LSM11	134353	LSM11, U7 small nuclear RNA associated
ENSG00000135083	17.7612	0.950976	0.185567	5.12471	2.98e-07	1.78e-06	CCNJL	79616	cyclin J like
ENSG00000164609	209.565	0.778362	0.0721842	10.783	4.14e-27	1.5e-25	SLU7	10569	SLU7 homolog, splicing factor
ENSG00000253522	34.522	0.80187	0.125597	6.38448	1.72e-10	1.58e-09	MIR3142HG	107075116	MIR3142 host gene
ENSG00000113328	100.828	-0.782119	0.103372	-7.56602	3.85e-14	5.23e-13	CCNG1	900	cyclin G1
ENSG00000120137	99.6426	-1.00202	0.1133	-8.84402	9.23e-19	1.86e-17	PANK3	79646	pantothenate kinase 3
ENSG00000040275	190.342	-0.715622	0.101554	-7.04675	1.83e-12	2.08e-11	SPDL1	54908	spindle apparatus coiled-coil protein 1
ENSG00000072786	9.33064	0.95146	0.228346	4.16675	3.09e-05	0.000131933	STK10	6793	serine/threonine kinase 10
ENSG00000174705	47.2714	0.775726	0.111361	6.96588	3.26e-12	3.59e-11	SH3PXD2B	285590	SH3 and PX domains 2B
ENSG00000214357	13.8883	1.7249	0.227593	7.5789	3.48e-14	4.75e-13	NEURL1B	54492	neuralized E3 ubiquitin protein ligase 1B
ENSG00000113732	161.37	0.749238	0.0770739	9.72102	2.45e-22	6.51e-21	ATP6V0E1	8992	ATPase H+ transporting V0 subunit e1
ENSG00000164463	8.79854	1.44493	0.246846	5.85355	4.81e-09	3.69e-08	CREBRF	153222	CREB3 regulatory factor
ENSG00000183072	4.89094	1.29733	0.329891	3.93261	8.4e-05	0.00032996	NKX2-5	1482	NK2 homeobox 5
ENSG00000113739	343.55	-0.920982	0.0902095	-10.2094	1.8e-24	5.6e-23	STC2	8614	stanniocalcin 2
ENSG00000113742	62.0043	0.834657	0.0984167	8.48085	2.24e-17	4.02e-16	CPEB4	80315	cytoplasmic polyadenylation element binding protein 4
ENSG00000175416	93.1679	1.14083	0.105409	10.8229	2.68e-27	9.89e-26	CLTB	1212	clathrin light chain B
ENSG00000113194	122.916	0.717768	0.0725925	9.88764	4.71e-23	1.32e-21	FAF2	23197	Fas associated factor family member 2
ENSG00000074276	11.8556	1.11939	0.21889	5.11392	3.16e-07	1.88e-06	CDHR2	54825	cadherin related family member 2
ENSG00000131187	19.2785	-0.951254	0.209624	-4.5379	5.68e-06	2.8e-05	F12	2161	coagulation factor XII
ENSG00000196923	17.2067	0.744258	0.188984	3.93821	8.21e-05	0.000323222	PDLIM7	9260	PDZ and LIM domain 7
ENSG00000054598	58.6653	1.47199	0.173284	8.49467	1.98e-17	3.59e-16	FOXC1	2296	forkhead box C1
ENSG00000021355	152.785	1.12274	0.0753704	14.8963	3.48e-50	4.68e-48	SERPINB1	1992	serpin family B member 1
ENSG00000170542	16.6851	0.757803	0.177454	4.27043	1.95e-05	8.64e-05	SERPINB9	5272	serpin family B member 9
ENSG00000124570	34.547	2.31072	0.148813	15.5276	2.26e-54	3.81e-52	SERPINB6	5269	serpin family B member 6
ENSG00000137285	285.278	0.894614	0.138796	6.44554	1.15e-10	1.08e-09	TUBB2B	347733	tubulin beta 2B class IIb
ENSG00000219607	6.42098	-1.61967	0.355566	-4.55519	5.23e-06	2.58e-05	PPP1R3G	648791	protein phosphatase 1 regulatory subunit 3G
ENSG00000153162	2.0098	3.35051	0.653252	5.12897	2.91e-07	1.75e-06	BMP6	654	bone morphogenetic protein 6
ENSG00000124786	18.1799	1.34476	0.191456	7.02388	2.16e-12	2.43e-11	SLC35B3	51000	solute carrier family 35 member B3
ENSG00000197977	250.923	-3.29048	0.101526	-32.4103	1.97e-230	7.23e-227	ELOVL2	54898	ELOVL fatty acid elongase 2
ENSG00000205269	8.00093	-1.73571	0.32427	-5.35267	8.67e-08	5.62e-07	TMEM170B	100113407	transmembrane protein 170B
ENSG00000078401	32.0975	3.06682	0.165066	18.5794	4.72e-77	1.83e-74	EDN1	1906	endothelin 1
ENSG00000145990	28.1165	-2.59408	0.223871	-11.5874	4.77e-31	2.14e-29	GFOD1	54438	glucose-fructose oxidoreductase domain containing 1
ENSG00000112149	5.28985	-1.53824	0.399134	-3.85394	0.000116231	0.000442592	CD83	9308	CD83 molecule
ENSG00000112183	3.44556	1.37856	0.414353	3.32701	0.000877819	0.00277438	RBM24	221662	RNA binding motif protein 24
ENSG00000112186	28.0644	1.02044	0.145974	6.99058	2.74e-12	3.04e-11	CAP2	10486	cyclase associated actin cytoskeleton regulatory protein 2
ENSG00000124766	752.059	2.50149	0.185994	13.4493	3.11e-41	2.57e-39	SOX4	6659	SRY-box transcription factor 4
ENSG00000112304	75.7228	1.66	0.147981	11.2177	3.34e-29	1.34e-27	ACOT13	55856	acyl-CoA thioesterase 13
ENSG00000111913	2.01635	2.71482	0.604648	4.48992	7.13e-06	3.44e-05	RIPOR2	9750	RHO family interacting cell polarization regulator 2
ENSG00000079689	11.2359	-1.72176	0.320384	-5.37405	7.7e-08	5.03e-07	SCGN	10590	secretagogin, EF-hand calcium binding protein
ENSG00000112337	31.2695	-1.63351	0.222518	-7.34101	2.12e-13	2.64e-12	SLC17A2	10246	solute carrier family 17 member 2
ENSG00000112343	61.4339	0.90946	0.0993768	9.15164	5.61e-20	1.22e-18	TRIM38	10475	tripartite motif containing 38
ENSG00000197061	2139.47	-0.977147	0.171557	-5.69574	1.23e-08	8.97e-08	H4C3	8364	H4 clustered histone 3
ENSG00000180573	8.87446	1.96847	0.270231	7.28442	3.23e-13	3.96e-12	H2AC6	8334	H2A clustered histone 6
ENSG00000186470	43.2285	0.845506	0.136661	6.18689	6.14e-10	5.28e-09	BTN3A2	11118	butyrophilin subfamily 3 member A2
ENSG00000197903	11.2719	-0.979393	0.282171	-3.47091	0.000518689	0.00172186	H2BC12	85236	H2B clustered histone 12
ENSG00000233822	5.41869	1.30129	0.308879	4.21295	2.52e-05	0.000109407	H2BC15	8341	H2B clustered histone 15
ENSG00000184357	16.0305	-0.856115	0.249543	-3.43073	0.000601952	0.00197112	H1-5	3009	H1.5 linker histone, cluster member
ENSG00000197062	12.9784	0.781173	0.198085	3.94363	8.03e-05	0.000316509	ZSCAN26	7741	zinc finger and SCAN domain containing 26
ENSG00000189298	21.5919	0.709193	0.159819	4.43747	9.1e-06	4.29e-05	ZKSCAN3	80317	zinc finger with KRAB and SCAN domains 3
ENSG00000232040	1.74935	-2.86359	0.828559	-3.45611	0.000548038	0.0018107	ZBED9	114821	zinc finger BED-type containing 9
ENSG00000204613	5.26927	-1.61739	0.387398	-4.17501	2.98e-05	0.000127496	TRIM10	10107	tripartite motif containing 10
ENSG00000204610	19.2415	-1.24895	0.211782	-5.89733	3.69e-09	2.87e-08	TRIM15	89870	tripartite motif containing 15
ENSG00000146112	37.4787	0.926869	0.12386	7.48321	7.25e-14	9.63e-13	PPP1R18	170954	protein phosphatase 1 regulatory subunit 18
ENSG00000137331	3155.61	0.909665	0.0891821	10.2001	1.98e-24	6.13e-23	IER3	8870	immediate early response 3
ENSG00000204580	201.908	1.26079	0.0698094	18.0604	6.54e-73	2.24e-70	DDR1	780	discoidin domain receptor tyrosine kinase 1
ENSG00000204531	7.10111	-0.969187	0.294035	-3.29617	0.000980138	0.00307071	POU5F1	5460	POU class 5 homeobox 1
ENSG00000213719	19.2484	0.797924	0.195697	4.07734	4.56e-05	0.000189136	CLIC1	1192	chloride intracellular channel 1
ENSG00000204228	19.637	-0.894023	0.194219	-4.60317	4.16e-06	2.09e-05	HSD17B8	7923	hydroxysteroid 17-beta dehydrogenase 8
ENSG00000096433	119.027	1.62402	0.123893	13.1083	2.95e-39	2.12e-37	ITPR3	3710	inositol 1,4,5-trisphosphate receptor type 3
ENSG00000186577	80.7931	0.823941	0.100618	8.18882	2.64e-16	4.41e-15	SMIM29	221491	small integral membrane protein 29
ENSG00000112039	30.6229	-1.09398	0.160548	-6.81403	9.49e-12	1e-10	FANCE	2178	FA complementation group E
ENSG00000156711	196.443	1.22319	0.0968472	12.6301	1.44e-36	8.9e-35	MAPK13	5603	mitogen-activated protein kinase 13
ENSG00000124762	336.475	1.67299	0.129593	12.9096	3.98e-38	2.71e-36	CDKN1A	1026	cyclin dependent kinase inhibitor 1A
ENSG00000172738	7.79959	1.07741	0.270186	3.98766	6.67e-05	0.000268409	TMEM217	221468	transmembrane protein 217
ENSG00000183826	8.05358	1.33849	0.261757	5.11348	3.16e-07	1.88e-06	BTBD9	114781	BTB domain containing 9
ENSG00000146122	1.74258	4.61173	0.707962	6.5141	7.31e-11	7.02e-10	DAAM2	23500	dishevelled associated activator of morphogenesis 2
ENSG00000124602	3.67632	1.87665	0.401115	4.67858	2.89e-06	1.49e-05	UNC5CL	222643	unc-5 family C-terminal like
ENSG00000161912	2.3231	2.60625	0.543167	4.79825	1.6e-06	8.6e-06	ADCY10P1	221442	ADCY10 pseudogene 1
ENSG00000096088	522.973	1.41118	0.107709	13.1018	3.22e-39	2.3e-37	PGC	5225	progastricsin
ENSG00000112576	36.7231	0.981699	0.129941	7.55498	4.19e-14	5.67e-13	CCND3	896	cyclin D3
ENSG00000188112	51.821	2.18991	0.159063	13.7676	3.99e-43	3.72e-41	C6orf132	647024	chromosome 6 open reading frame 132
ENSG00000048544	220.966	0.840239	0.0685286	12.2611	1.46e-34	7.75e-33	MRPS10	55173	mitochondrial ribosomal protein S10
ENSG00000221821	34.225	0.702652	0.126281	5.56421	2.63e-08	1.85e-07	C6orf226	441150	chromosome 6 open reading frame 226
ENSG00000204052	6.98713	1.27548	0.311908	4.08928	4.33e-05	0.000180273	LRRC73	221424	leucine rich repeat containing 73
ENSG00000137207	110.616	0.777623	0.107106	7.26032	3.86e-13	4.68e-12	YIPF3	25844	Yip1 domain family member 3
ENSG00000112715	101.623	-0.735569	0.135314	-5.436	5.45e-08	3.63e-07	VEGFA	7422	vascular endothelial growth factor A
ENSG00000196284	30.3838	-1.06903	0.158961	-6.72514	1.75e-11	1.8e-10	SUPT3H	8464	SPT3 homolog, SAGA and STAGA complex component
ENSG00000153291	1.97323	4.32477	0.659844	6.55423	5.59e-11	5.44e-10	SLC25A27	9481	solute carrier family 25 member 27
ENSG00000146072	511.468	1.48779	0.108749	13.6809	1.32e-42	1.2e-40	TNFRSF21	27242	TNF receptor superfamily member 21
ENSG00000243955	37.7351	-3.78412	0.307399	-12.3101	7.99e-35	4.34e-33	GSTA1	2938	glutathione S-transferase alpha 1
ENSG00000112144	67.7163	0.774919	0.112546	6.88536	5.76e-12	6.2e-11	ICK	22858	intestinal cell kinase
ENSG00000231683	6.11972	-3.79832	0.626983	-6.05809	1.38e-09	1.13e-08	LOC101927136	101927136	uncharacterized LOC101927136
ENSG00000151914	411.186	0.828452	0.0512279	16.1719	7.96e-59	1.67e-56	DST	667	dystonin
ENSG00000082269	98.0467	1.32999	0.0889703	14.9487	1.59e-50	2.2e-48	FAM135A	57579	family with sequence similarity 135 member A
ENSG00000185760	1.40279	3.77545	0.694189	5.43865	5.37e-08	3.59e-07	KCNQ5	56479	potassium voltage-gated channel subfamily Q member 5
ENSG00000156535	21.4695	2.90126	0.347521	8.34845	6.92e-17	1.2e-15	CD109	135228	CD109 molecule
ENSG00000196586	163.193	1.20223	0.0841173	14.2923	2.44e-46	2.64e-44	MYO6	4646	myosin VI
ENSG00000270362	3.03223	1.6295	0.456257	3.57146	0.000355	0.00122291	HMGN3-AS1	100288198	HMGN3 antisense RNA 1
ENSG00000135338	21.5	0.923171	0.158283	5.83241	5.46e-09	4.16e-08	LCA5	167691	lebercilin LCA5
ENSG00000112773	55.291	2.32383	0.153915	15.0981	1.67e-51	2.43e-49	TENT5A	55603	terminal nucleotidyltransferase 5A
ENSG00000135318	8.40791	1.88746	0.277533	6.80085	1.04e-11	1.09e-10	NT5E	4907	5'-nucleotidase ecto
ENSG00000146278	48.5751	1.01291	0.174759	5.79603	6.79e-09	5.1e-08	PNRC1	10957	proline rich nuclear receptor coactivator 1
ENSG00000146281	111.496	-1.03469	0.115183	-8.98303	2.63e-19	5.51e-18	PM20D2	135293	peptidase M20 domain containing 2
ENSG00000146267	2.53387	2.6162	0.52684	4.96584	6.84e-07	3.88e-06	FAXC	84553	failed axon connections homolog, metaxin like GST domain containing
ENSG00000112297	93.2344	-0.976359	0.104509	-9.34233	9.42e-21	2.2e-19	CRYBG1	202	crystallin beta-gamma domain containing 1
ENSG00000112320	95.7113	-1.17841	0.102992	-11.4418	2.59e-30	1.11e-28	SOBP	55084	sine oculis binding protein homolog
ENSG00000081087	29.0274	0.837682	0.139963	5.98505	2.16e-09	1.74e-08	OSTM1	28962	osteoclastogenesis associated transmembrane protein 1
ENSG00000135596	14.015	1.45643	0.195837	7.43691	1.03e-13	1.34e-12	MICAL1	64780	microtubule associated monooxygenase, calponin and LIM domain containing 1
ENSG00000112394	25.2983	-1.52615	0.176933	-8.62559	6.38e-18	1.2e-16	SLC16A10	117247	solute carrier family 16 member 10
ENSG00000056972	53.6669	1.28784	0.134998	9.53972	1.43e-21	3.56e-20	TRAF3IP2	10758	TRAF3 interacting protein 2
ENSG00000010810	8.2592	2.14334	0.299601	7.15397	8.43e-13	9.82e-12	FYN	2534	FYN proto-oncogene, Src family tyrosine kinase
ENSG00000111816	64.3095	1.44512	0.116556	12.3986	2.66e-35	1.48e-33	FRK	2444	fyn related Src family tyrosine kinase
ENSG00000111834	1.91838	3.04556	0.6634	4.59083	4.41e-06	2.21e-05	RSPH4A	345895	radial spoke head component 4A
ENSG00000111860	6.73712	1.21144	0.302437	4.00561	6.19e-05	0.000250809	CEP85L	387119	centrosomal protein 85 like
ENSG00000111885	363.41	-1.19958	0.129287	-9.27846	1.72e-20	3.91e-19	MAN1A1	4121	mannosidase alpha class 1A member 1
ENSG00000135549	1.44425	2.52409	0.688023	3.66861	0.000243869	0.000871105	PKIB	5570	cAMP-dependent protein kinase inhibitor beta
ENSG00000118518	30.4818	0.957381	0.174317	5.49218	3.97e-08	2.7e-07	RNF146	81847	ring finger protein 146
ENSG00000256162	73.5295	-0.988809	0.129463	-7.63776	2.21e-14	3.08e-13	SMLR1	100507203	small leucine rich protein 1
ENSG00000118520	2.80881	-4.75708	1.0431	-4.56052	5.1e-06	2.52e-05	ARG1	383	arginase 1
ENSG00000154269	15.4797	-1.51416	0.258099	-5.86657	4.45e-09	3.42e-08	ENPP3	5169	ectonucleotide pyrophosphatase/phosphodiesterase 3
ENSG00000197594	316.866	-0.893949	0.0803546	-11.1251	9.47e-29	3.73e-27	ENPP1	5167	ectonucleotide pyrophosphatase/phosphodiesterase 1
ENSG00000112299	9.49393	3.90138	0.357172	10.923	8.95e-28	3.37e-26	VNN1	8876	vanin 1
ENSG00000146409	29.1701	-1.01756	0.176164	-5.77622	7.64e-09	5.71e-08	SLC18B1	116843	solute carrier family 18 member B1
ENSG00000231023	4.87123	5.01992	0.592362	8.47441	2.36e-17	4.25e-16	LINC00326	285735	long intergenic non-protein coding RNA 326
ENSG00000118515	25.4772	-0.829907	0.171709	-4.83322	1.34e-06	7.29e-06	SGK1	6446	serum/glucocorticoid regulated kinase 1
ENSG00000118514	9.30009	-2.35755	0.342618	-6.88099	5.94e-12	6.38e-11	ALDH8A1	64577	aldehyde dehydrogenase 8 family member A1
ENSG00000112378	542.041	1.12779	0.0894414	12.6092	1.88e-36	1.14e-34	PERP	64065	p53 apoptosis effector related to PMP22
ENSG00000112379	24.3391	3.82277	0.223764	17.0839	1.96e-65	5.43e-63	ARFGEF3	57221	ARFGEF family member 3
ENSG00000146386	50.0191	1.07828	0.139152	7.74892	9.27e-15	1.34e-13	ABRACL	58527	ABRA C-terminal like
ENSG00000112406	5.10186	1.7259	0.334405	5.1611	2.46e-07	1.49e-06	HECA	51696	hdc homolog, cell cycle regulator
ENSG00000164442	8.82832	-1.66797	0.350367	-4.76065	1.93e-06	1.02e-05	CITED2	10370	Cbp/p300 interacting transactivator with Glu/Asp rich carboxy-terminal domain 2
ENSG00000236366	1.0393	3.60279	0.74991	4.80429	1.55e-06	8.37e-06	LOC153910	153910	uncharacterized LOC153910
ENSG00000034693	20.1396	-1.11329	0.182725	-6.09272	1.11e-09	9.26e-09	PEX3	8504	peroxisomal biogenesis factor 3
ENSG00000112419	232.034	-0.819335	0.0630256	-13	1.22e-38	8.44e-37	PHACTR2	9749	phosphatase and actin regulator 2
ENSG00000178199	1.34662	-2.89193	0.868085	-3.33139	0.000864136	0.00273584	ZC3H12D	340152	zinc finger CCCH-type containing 12D
ENSG00000120256	86.2376	-1.08232	0.131098	-8.25582	1.51e-16	2.55e-15	LRP11	84918	LDL receptor related protein 11
ENSG00000131016	760.003	2.37281	0.0635311	37.3489	2.64e-305	1.94e-301	AKAP12	9590	A-kinase anchoring protein 12
ENSG00000131018	14.5443	0.770565	0.218182	3.53176	0.000412809	0.00139947	SYNE1	23345	spectrin repeat containing nuclear envelope protein 1
ENSG00000153721	88.7653	-0.961842	0.0899405	-10.6942	1.08e-26	3.84e-25	CNKSR3	154043	CNKSR family member 3
ENSG00000078269	243.176	-0.864865	0.0800457	-10.8046	3.27e-27	1.19e-25	SYNJ2	8871	synaptojanin 2
ENSG00000130363	28.0778	0.759473	0.170387	4.45735	8.3e-06	3.95e-05	RSPH3	83861	radial spoke head 3
ENSG00000112096	256.214	-1.0818	0.117144	-9.2348	2.59e-20	5.84e-19	SOD2	6648	superoxide dismutase 2
ENSG00000120437	896.335	-1.46881	0.123457	-11.8974	1.22e-32	5.76e-31	ACAT2	39	acetyl-CoA acetyltransferase 2
ENSG00000146477	16.7716	-2.50633	0.264126	-9.48914	2.33e-21	5.67e-20	SLC22A3	6581	solute carrier family 22 member 3
ENSG00000060762	116.939	-1.80711	0.150983	-11.9689	5.17e-33	2.52e-31	MPC1	51660	mitochondrial pyruvate carrier 1
ENSG00000112494	22.5604	-1.39361	0.210847	-6.60958	3.85e-11	3.82e-10	UNC93A	54346	unc-93 homolog A
ENSG00000164488	5.01102	1.54833	0.335265	4.61823	3.87e-06	1.95e-05	DACT2	168002	dishevelled binding antagonist of beta catenin 2
ENSG00000186340	6.802	5.30254	0.576307	9.20089	3.55e-20	7.85e-19	THBS2	7058	thrombospondin 2
ENSG00000177706	153.485	-0.965496	0.0903208	-10.6896	1.14e-26	4.01e-25	FAM20C	56975	FAM20C golgi associated secretory pathway kinase
ENSG00000197461	34.484	1.28359	0.15974	8.03548	9.32e-16	1.48e-14	PDGFA	5154	platelet derived growth factor subunit A
ENSG00000106003	15.7392	2.3749	0.232223	10.2268	1.5e-24	4.72e-23	LFNG	3955	LFNG O-fucosylpeptide 3-beta-N-acetylglucosaminyltransferase
ENSG00000164638	22.7515	-1.21959	0.182675	-6.67628	2.45e-11	2.49e-10	SLC29A4	222962	solute carrier family 29 member 4
ENSG00000008256	25.0191	1.01162	0.159298	6.35051	2.15e-10	1.95e-09	CYTH3	9265	cytohesin 3
ENSG00000106415	16.7365	-0.810867	0.233063	-3.47918	0.000502957	0.00167417	GLCCI1	113263	glucocorticoid induced 1
ENSG00000106460	47.9355	1.08287	0.134841	8.03069	9.69e-16	1.53e-14	TMEM106B	54664	transmembrane protein 106B
ENSG00000122644	69.9822	2.1247	0.219202	9.69287	3.23e-22	8.46e-21	ARL4A	10124	ADP ribosylation factor like GTPase 4A
ENSG00000106541	5.20334	3.46185	0.437146	7.9192	2.39e-15	3.65e-14	AGR2	10551	anterior gradient 2, protein disulphide isomerase family member
ENSG00000164649	27.9306	-1.26201	0.168466	-7.49118	6.83e-14	9.08e-13	CDCA7L	55536	cell division cycle associated 7 like
ENSG00000122591	36.9916	-0.894466	0.14376	-6.22194	4.91e-10	4.28e-09	FAM126A	84668	family with sequence similarity 126 member A
ENSG00000105928	49.1659	0.941914	0.114239	8.24511	1.65e-16	2.78e-15	GSDME	1687	gasdermin E
ENSG00000070882	77.4177	0.809618	0.0919072	8.80907	1.26e-18	2.5e-17	OSBPL3	26031	oxysterol binding protein like 3
ENSG00000233429	20.2906	2.04459	0.184398	11.0879	1.44e-28	5.54e-27	HOTAIRM1	100506311	HOXA transcript antisense RNA, myeloid-specific 1
ENSG00000253293	2.52043	2.46003	0.50077	4.91249	8.99e-07	5e-06	HOXA10	3206	homeobox A10
ENSG00000106049	8.81899	-1.15859	0.294593	-3.93283	8.4e-05	0.000329753	HIBADH	11112	3-hydroxyisobutyrate dehydrogenase
ENSG00000146592	27.2846	1.37411	0.154046	8.92009	4.66e-19	9.56e-18	CREB5	9586	cAMP responsive element binding protein 5
ENSG00000106066	46.4939	-1.53058	0.262048	-5.84084	5.19e-09	3.96e-08	CPVL	54504	carboxypeptidase vitellogenic like
ENSG00000106069	46.6767	-1.0802	0.128852	-8.38326	5.15e-17	9.06e-16	CHN2	1124	chimerin 2
ENSG00000271122	10.4821	0.903421	0.24123	3.74507	0.000180346	0.000663271	LOC101930085	101930085	uncharacterized LOC101930085
ENSG00000011426	95.5962	-0.764096	0.129359	-5.90677	3.49e-09	2.72e-08	ANLN	54443	anillin actin binding protein
ENSG00000175600	15.9269	-1.59341	0.226754	-7.02706	2.11e-12	2.38e-11	SUGCT	79783	succinyl-CoA:glutarate-CoA transferase
ENSG00000122515	43.9036	0.892161	0.12842	6.94723	3.73e-12	4.09e-11	ZMIZ2	83637	zinc finger MIZ-type containing 2
ENSG00000132437	40.3889	-2.65907	0.192692	-13.7996	2.56e-43	2.4e-41	DDC	1644	dopa decarboxylase
ENSG00000106070	27.5323	2.92481	0.230879	12.6682	8.88e-37	5.6e-35	GRB10	2887	growth factor receptor bound protein 10
ENSG00000106078	18.8586	1.55341	0.198222	7.83669	4.63e-15	6.89e-14	COBL	23242	cordon-bleu WH2 repeat protein
ENSG00000196247	9.4032	-1.03743	0.284698	-3.64398	0.000268458	0.000948114	ZNF107	51427	zinc finger protein 107
ENSG00000213462	55.5786	0.805831	0.128656	6.26345	3.77e-10	3.33e-09	ERV3-1	2086	endogenous retrovirus group 3 member 1, envelope
ENSG00000146755	4.29352	1.15083	0.347699	3.30983	0.000933511	0.00293589	TRIM50	135892	tripartite motif containing 50
ENSG00000009950	276.143	-1.23638	0.0945989	-13.0697	4.9e-39	3.48e-37	MLXIPL	51085	MLX interacting protein like
ENSG00000189143	236.279	1.55703	0.104527	14.8959	3.5e-50	4.68e-48	CLDN4	1364	claudin 4
ENSG00000106683	39.0025	0.796771	0.126579	6.29465	3.08e-10	2.75e-09	LIMK1	3984	LIM domain kinase 1
ENSG00000106665	20.6774	1.11673	0.165276	6.75674	1.41e-11	1.46e-10	CLIP2	7461	CAP-Gly domain containing linker protein 2
ENSG00000127946	56.5099	1.12778	0.13579	8.30528	9.96e-17	1.72e-15	HIP1	3092	huntingtin interacting protein 1
ENSG00000127952	57.9501	1.15059	0.134358	8.56366	1.09e-17	2.04e-16	STYXL1	51657	serine/threonine/tyrosine interacting like 1
ENSG00000177679	4.00616	1.42712	0.378643	3.76904	0.000163878	0.000607509	SRRM3	222183	serine/arginine repetitive matrix 3
ENSG00000146700	36.5287	-0.762662	0.140711	-5.42005	5.96e-08	3.95e-07	SSC4D	136853	scavenger receptor cysteine rich family member with 4 domains
ENSG00000234456	77.0194	1.02272	0.0902909	11.3269	9.65e-30	4.03e-28	MAGI2-AS3	100505881	MAGI2 antisense RNA 3
ENSG00000075223	8.11444	3.72077	0.39542	9.40966	4.98e-21	1.18e-19	SEMA3C	10512	semaphorin 3C
ENSG00000075213	57.8816	5.30119	0.212723	24.9206	4.45e-137	5.95e-134	SEMA3A	10371	semaphorin 3A
ENSG00000005471	22.3879	1.27	0.162973	7.79268	6.56e-15	9.63e-14	ABCB4	5244	ATP binding cassette subfamily B member 4
ENSG00000085563	49.0943	2.23878	0.149983	14.9269	2.2e-50	3.03e-48	ABCB1	5243	ATP binding cassette subfamily B member 1
ENSG00000006634	68.9548	-0.783823	0.101423	-7.72828	1.09e-14	1.57e-13	DBF4	10926	DBF4 zinc finger
ENSG00000008277	7.6267	1.54425	0.279009	5.53475	3.12e-08	2.16e-07	ADAM22	53616	ADAM metallopeptidase domain 22
ENSG00000157214	5.09095	1.06523	0.316008	3.37089	0.000749259	0.00240318	STEAP2	261729	STEAP2 metalloreductase
ENSG00000127980	12.575	0.720339	0.210408	3.42354	0.000618109	0.00201908	PEX1	5189	peroxisomal biogenesis factor 1
ENSG00000105825	1.93629	3.04869	0.63518	4.79973	1.59e-06	8.55e-06	TFPI2	7980	tissue factor pathway inhibitor 2
ENSG00000242265	2259.99	-0.861212	0.0394363	-21.8381	1.01e-105	8.25e-103	PEG10	23089	paternally expressed 10
ENSG00000158528	131.166	0.714934	0.0850939	8.4017	4.4e-17	7.79e-16	PPP1R9A	55607	protein phosphatase 1 regulatory subunit 9A
ENSG00000105854	327.946	0.97903	0.100958	9.69742	3.09e-22	8.12e-21	PON2	5445	paraoxonase 2
ENSG00000005981	24.5671	4.18857	0.576385	7.26697	3.68e-13	4.46e-12	ASB4	51666	ankyrin repeat and SOCS box containing 4
ENSG00000004799	1.30321	3.94962	0.831134	4.75208	2.01e-06	1.06e-05	PDK4	5166	pyruvate dehydrogenase kinase 4
ENSG00000006453	141.996	0.768823	0.0792505	9.70118	2.98e-22	7.85e-21	BAIAP2L1	55971	BAR/IMD domain containing adaptor protein 2 like 1
ENSG00000196367	20.6076	-0.830728	0.183249	-4.53332	5.81e-06	2.85e-05	TRRAP	8295	transformation/transcription domain associated protein
ENSG00000106258	8.77827	3.23393	0.321036	10.0734	7.24e-24	2.15e-22	CYP3A5	1577	cytochrome P450 family 3 subfamily A member 5
ENSG00000160862	94.4529	0.940464	0.0939316	10.0122	1.35e-23	3.88e-22	AZGP1	563	alpha-2-glycoprotein 1, zinc-binding
ENSG00000166925	29.7671	0.916251	0.224081	4.08892	4.33e-05	0.000180448	TSC22D4	81628	TSC22 domain family member 4
ENSG00000106333	16.4654	-1.56947	0.236175	-6.64535	3.02e-11	3.03e-10	PCOLCE	5118	procollagen C-endopeptidase enhancer
ENSG00000106327	24.6327	-0.973353	0.183391	-5.30752	1.11e-07	7.09e-07	TFR2	7036	transferrin receptor 2
ENSG00000130427	66.6217	-3.09316	0.215298	-14.3668	8.36e-47	9.17e-45	EPO	2056	erythropoietin
ENSG00000146839	1.81921	-2.97287	0.814287	-3.65089	0.000261336	0.000924959	ZAN	7455	zonadhesin (gene/pseudogene)
ENSG00000106366	1169.56	1.48917	0.132869	11.2078	3.73e-29	1.5e-27	SERPINE1	5054	serpin family E member 1
ENSG00000128564	35.4597	4.6818	0.459585	10.187	2.27e-24	6.96e-23	VGF	7425	VGF nerve growth factor inducible
ENSG00000160991	72.3123	0.713007	0.11163	6.38726	1.69e-10	1.56e-09	ORAI2	80228	ORAI calcium release-activated calcium modulator 2
ENSG00000128512	86.5906	1.14274	0.111484	10.2503	1.18e-24	3.73e-23	DOCK4	9732	dedicator of cytokinesis 4
ENSG00000214194	22.3781	-2.76624	0.275285	-10.0486	9.32e-24	2.72e-22	SMIM30	401397	small integral membrane protein 30
ENSG00000225546	4.97857	-2.0551	0.444682	-4.6215	3.81e-06	1.92e-05	LINC02476	105375475	long intergenic non-protein coding RNA 2476
ENSG00000008311	9.79386	-0.996292	0.267889	-3.71905	0.000199974	0.000726666	AASS	10157	aminoadipate-semialdehyde synthase
ENSG00000128609	300.857	-0.754214	0.0827899	-9.10998	8.24e-20	1.77e-18	NDUFA5	4698	NADH:ubiquinone oxidoreductase subunit A5
ENSG00000128602	21.9539	-0.760278	0.182646	-4.16257	3.15e-05	0.000134215	SMO	6608	smoothened, frizzled class receptor
ENSG00000186591	207.7	1.28917	0.0875062	14.7324	3.99e-49	5.02e-47	UBE2H	7328	ubiquitin conjugating enzyme E2 H
ENSG00000128510	2.2951	3.60816	0.663093	5.44141	5.29e-08	3.53e-07	CPA4	51200	carboxypeptidase A4
ENSG00000106477	49.2028	0.783404	0.113235	6.91838	4.57e-12	4.98e-11	CEP41	95681	centrosomal protein 41
ENSG00000106484	36.3968	-1.09639	0.162069	-6.76497	1.33e-11	1.38e-10	MEST	4232	mesoderm specific transcript
ENSG00000221866	3.30762	4.86747	0.608756	7.99576	1.29e-15	2.03e-14	PLXNA4	91584	plexin A4
ENSG00000198074	32.9778	-0.943607	0.149022	-6.33201	2.42e-10	2.18e-09	AKR1B10	57016	aldo-keto reductase family 1 member B10
ENSG00000146856	9.0641	1.22541	0.242171	5.06012	4.19e-07	2.45e-06	AGBL3	340351	ATP/GTP binding protein like 3
ENSG00000105875	15.3427	-1.47977	0.229855	-6.43784	1.21e-10	1.14e-09	WDR91	29062	WD repeat domain 91
ENSG00000155561	51.8815	-0.749491	0.117136	-6.39847	1.57e-10	1.45e-09	NUP205	23165	nucleoporin 205
ENSG00000182158	208.934	-0.798692	0.0938438	-8.51087	1.73e-17	3.14e-16	CREB3L2	64764	cAMP responsive element binding protein 3 like 2
ENSG00000122787	51.3522	-1.39719	0.170869	-8.17695	2.91e-16	4.83e-15	AKR1D1	6718	aldo-keto reductase family 1 member D1
ENSG00000146858	15.2987	-1.04117	0.228819	-4.55021	5.36e-06	2.64e-05	ZC3HAV1L	92092	zinc finger CCCH-type containing, antiviral 1 like
ENSG00000260231	19.2756	1.07276	0.177342	6.04907	1.46e-09	1.19e-08	KDM7A-DT	100134229	KDM7A divergent transcript
ENSG00000257093	16.9038	-1.02142	0.195659	-5.22041	1.79e-07	1.11e-06	DENND11	57189	DENN domain containing 11
ENSG00000178826	11.1885	1.14729	0.219512	5.22652	1.73e-07	1.07e-06	TMEM139	135932	transmembrane protein 139
ENSG00000146904	23.3995	-1.57624	0.19836	-7.94633	1.92e-15	2.95e-14	EPHA1	2041	EPH receptor A1
ENSG00000155660	648.252	-0.892326	0.0879102	-10.1504	3.3e-24	9.98e-23	PDIA4	9601	protein disulfide isomerase family A member 4
ENSG00000106526	2.92859	1.48403	0.440938	3.36562	0.00076373	0.0024448	ACTR3C	653857	actin related protein 3C
ENSG00000164867	6.76416	1.96202	0.31485	6.23158	4.62e-10	4.05e-09	NOS3	4846	nitric oxide synthase 3
ENSG00000197150	20.9312	-0.841524	0.191621	-4.3916	1.13e-05	5.21e-05	ABCB8	11194	ATP binding cassette subfamily B member 8
ENSG00000196584	36.9558	-0.9774	0.172997	-5.64981	1.61e-08	1.16e-07	XRCC2	7516	X-ray repair cross complementing 2
ENSG00000216895	10.0805	0.893345	0.250363	3.5682	0.000359441	0.00123763	LOC100506302	100506302	uncharacterized LOC100506302
ENSG00000164690	22.41	0.922658	0.163067	5.65817	1.53e-08	1.11e-07	SHH	6469	sonic hedgehog signaling molecule
ENSG00000204876	24.9409	2.98082	0.187589	15.8901	7.42e-57	1.38e-54	LOC389602	389602	uncharacterized LOC389602
ENSG00000130675	47.5413	-1.3415	0.284599	-4.71366	2.43e-06	1.26e-05	MNX1	3110	motor neuron and pancreas homeobox 1
ENSG00000155093	12.1638	2.65519	0.272714	9.73615	2.11e-22	5.63e-21	PTPRN2	5799	protein tyrosine phosphatase receptor type N2
ENSG00000182378	137.391	-0.810625	0.0970112	-8.35599	6.49e-17	1.13e-15	PLCXD1	55344	phosphatidylinositol specific phospholipase C X domain containing 1
ENSG00000236871	5.41153	-1.24684	0.374243	-3.33163	0.000863399	0.0027341	LINC00106	751580	long intergenic non-protein coding RNA 106
ENSG00000006756	98.0326	1.52406	0.141088	10.8022	3.36e-27	1.22e-25	ARSD	414	arylsulfatase D
ENSG00000205542	102.362	3.41341	0.328016	10.4062	2.32e-25	7.61e-24	TMSB4X	7114	thymosin beta 4 X-linked
ENSG00000087842	50.7118	-0.85189	0.113881	-7.4805	7.4e-14	9.81e-13	PIR	8544	pirin
ENSG00000102098	6.83334	-2.18345	0.389951	-5.59928	2.15e-08	1.53e-07	SCML2	10389	Scm polycomb group protein like 2
ENSG00000173674	408.099	-1.0257	0.0739821	-13.8641	1.04e-43	1e-41	EIF1AX	1964	eukaryotic translation initiation factor 1A X-linked
ENSG00000177189	659.498	-1.08186	0.0871666	-12.4114	2.27e-35	1.26e-33	RPS6KA3	6197	ribosomal protein S6 kinase A3
ENSG00000130066	1636.06	0.765703	0.0599318	12.7763	2.23e-37	1.47e-35	SAT1	6303	spermidine/spermine N1-acetyltransferase 1
ENSG00000005889	53.1189	-0.725	0.146898	-4.9354	8e-07	4.49e-06	ZFX	7543	zinc finger protein X-linked
ENSG00000067992	14.11	-0.736666	0.209513	-3.51608	0.000437961	0.00147755	PDK3	5165	pyruvate dehydrogenase kinase 3
ENSG00000102230	13.4664	0.915778	0.212404	4.3115	1.62e-05	7.31e-05	PCYT1B	9468	phosphate cytidylyltransferase 1, choline, beta
ENSG00000156298	30.3123	1.39669	0.163546	8.54005	1.34e-17	2.47e-16	TSPAN7	7102	tetraspanin 7
ENSG00000165175	43.6526	-1.91608	0.158219	-12.1103	9.31e-34	4.74e-32	MID1IP1	58526	MID1 interacting protein 1
ENSG00000224294	2.41333	2.87072	0.555695	5.166	2.39e-07	1.46e-06	PINCR	101927501	p53-induced noncoding RNA
ENSG00000065923	15.3521	0.898787	0.192445	4.67034	3.01e-06	1.55e-05	SLC9A7	84679	solute carrier family 9 member A7
ENSG00000130988	115.892	-1.07439	0.112446	-9.55473	1.24e-21	3.1e-20	RGN	9104	regucalcin
ENSG00000102265	64.0486	2.8715	0.240397	11.9448	6.91e-33	3.3e-31	TIMP1	7076	TIMP metallopeptidase inhibitor 1
ENSG00000126767	118.134	-0.751832	0.107136	-7.01752	2.26e-12	2.53e-11	ELK1	2002	ETS transcription factor ELK1
ENSG00000102312	29.3497	0.946624	0.155309	6.09509	1.09e-09	9.14e-09	PORCN	64840	porcupine O-acyltransferase
ENSG00000147155	350.843	-0.837589	0.099783	-8.39411	4.69e-17	8.3e-16	EBP	10682	EBP cholestenol delta-isomerase
ENSG00000196998	17.3054	0.922907	0.177441	5.20122	1.98e-07	1.22e-06	WDR45	11152	WD repeat domain 45
ENSG00000102007	2.71863	1.97703	0.499523	3.95784	7.56e-05	0.000300089	PLP2	5355	proteolipid protein 2
ENSG00000171365	94.3279	0.926973	0.0878961	10.5462	5.29e-26	1.79e-24	CLCN5	1184	chloride voltage-gated channel 5
ENSG00000158352	7.17604	4.78957	0.523881	9.14248	6.1e-20	1.32e-18	SHROOM4	57477	shroom family member 4
ENSG00000067445	12.0798	1.61689	0.232853	6.94385	3.82e-12	4.18e-11	TRO	7216	trophinin
ENSG00000169188	56.375	0.946817	0.116586	8.12118	4.62e-16	7.54e-15	APEX2	27301	apurinic/apyrimidinic endodeoxyribonuclease 2
ENSG00000184675	20.3453	-0.736993	0.172956	-4.26115	2.03e-05	8.98e-05	AMER1	139285	APC membrane recruitment protein 1
ENSG00000079482	2.58489	2.32618	0.484759	4.79863	1.6e-06	8.58e-06	OPHN1	4983	oligophrenin 1
ENSG00000181191	35.3835	0.733635	0.131205	5.59151	2.25e-08	1.59e-07	PJA1	64219	praja ring finger ubiquitin ligase 1
ENSG00000158813	88.8615	0.704275	0.106969	6.58393	4.58e-11	4.51e-10	EDA	1896	ectodysplasin A
ENSG00000082458	70.3162	1.02398	0.107951	9.48557	2.41e-21	5.84e-20	DLG3	1741	discs large MAGUK scaffold protein 3
ENSG00000184481	14.3806	0.760864	0.192203	3.95865	7.54e-05	0.000299178	FOXO4	4303	forkhead box O4
ENSG00000187325	26.338	-1.24561	0.170737	-7.29552	2.98e-13	3.66e-12	TAF9B	51616	TATA-box binding protein associated factor 9b
ENSG00000147180	16.1848	-4.63104	0.497958	-9.30006	1.4e-20	3.22e-19	ZNF711	7552	zinc finger protein 711
ENSG00000102359	5.36998	2.39853	0.417916	5.73927	9.51e-09	7.02e-08	SRPX2	27286	sushi repeat containing protein X-linked 2
ENSG00000102362	4.94594	2.27115	0.405209	5.60489	2.08e-08	1.48e-07	SYTL4	94121	synaptotagmin like 4
ENSG00000133169	90.0999	-0.870442	0.12995	-6.69828	2.11e-11	2.15e-10	BEX1	55859	brain expressed X-linked 1
ENSG00000166681	334.066	-1.1323	0.0946382	-11.9646	5.45e-33	2.64e-31	BEX3	27018	brain expressed X-linked 3
ENSG00000133142	99.8328	-0.998474	0.091385	-10.926	8.66e-28	3.27e-26	TCEAL4	79921	transcription elongation factor A like 4
ENSG00000123560	83.1666	5.49386	0.428388	12.8245	1.2e-37	7.99e-36	PLP1	5354	proteolipid protein 1
ENSG00000157502	1.47794	3.87147	0.745035	5.19636	2.03e-07	1.25e-06	PWWP3B	139221	PWWP domain containing 3B
ENSG00000133131	236.111	1.52362	0.0804193	18.946	4.77e-80	2.19e-77	MORC4	79710	MORC family CW-type zinc finger 4
ENSG00000157514	4.55952	2.61766	0.443025	5.90861	3.45e-09	2.69e-08	TSC22D3	1831	TSC22 domain family member 3
ENSG00000197565	23.3594	1.29029	0.171603	7.519	5.52e-14	7.41e-13	COL4A6	1288	collagen type IV alpha 6 chain
ENSG00000068366	988.25	-1.09557	0.118271	-9.26326	1.98e-20	4.51e-19	ACSL4	2182	acyl-CoA synthetase long chain family member 4
ENSG00000101935	39.5438	0.714156	0.136373	5.23679	1.63e-07	1.02e-06	AMMECR1	9949	AMMECR nuclear protein 1
ENSG00000126016	3.70663	-3.04272	0.640936	-4.7473	2.06e-06	1.08e-05	AMOT	154796	angiomotin
ENSG00000101856	80.3694	-0.91002	0.110703	-8.22039	2.03e-16	3.41e-15	PGRMC1	10857	progesterone receptor membrane component 1
ENSG00000125354	42.6826	-1.13673	0.161301	-7.04727	1.82e-12	2.08e-11	SEPTIN6	23157	septin 6
ENSG00000182890	7.9078	-1.1562	0.295891	-3.90751	9.33e-05	0.000362888	GLUD2	2747	glutamate dehydrogenase 2
ENSG00000102038	548.399	-0.71605	0.0799029	-8.96149	3.2e-19	6.65e-18	SMARCA1	6594	SWI/SNF related, matrix associated, actin dependent regulator of chromatin, subfamily a, member 1
ENSG00000102034	22.3327	1.27891	0.160754	7.95569	1.78e-15	2.75e-14	ELF4	2000	E74 like ETS transcription factor 4
ENSG00000147255	93.1502	-1.69622	0.17787	-9.53625	1.48e-21	3.67e-20	IGSF1	3547	immunoglobulin superfamily member 1
ENSG00000165704	21.5436	-1.19653	0.192403	-6.21888	5.01e-10	4.36e-09	HPRT1	3251	hypoxanthine phosphoribosyltransferase 1
ENSG00000156500	1.61063	2.76321	0.731518	3.77736	0.000158501	0.000589061	FAM122C	159091	family with sequence similarity 122C
ENSG00000101928	108.449	1.73096	0.10743	16.1125	2.09e-58	4.2e-56	MOSPD1	56180	motile sperm domain containing 1
ENSG00000134590	18.4853	0.785468	0.182603	4.3015	1.7e-05	7.61e-05	RTL8C	8933	retrotransposon Gag like 8C
ENSG00000010404	29.7099	1.21247	0.14891	8.1423	3.88e-16	6.39e-15	IDS	3423	iduronate 2-sulfatase
ENSG00000102181	26.8587	0.886908	0.162659	5.45256	4.97e-08	3.34e-07	CD99L2	83692	CD99 molecule like 2
ENSG00000147400	171.747	-0.987409	0.0923505	-10.692	1.11e-26	3.92e-25	CETN2	1069	centrin 2
ENSG00000182492	8.12426	2.42119	0.353176	6.85548	7.11e-12	7.56e-11	BGN	633	biglycan
ENSG00000130829	1955.11	-0.941532	0.0778795	-12.0896	1.2e-33	6.06e-32	DUSP9	1852	dual specificity phosphatase 9
ENSG00000130821	234.699	-0.895807	0.184546	-4.8541	1.21e-06	6.6e-06	SLC6A8	6535	solute carrier family 6 member 8
ENSG00000198910	7.89278	1.20914	0.268618	4.50134	6.75e-06	3.27e-05	L1CAM	3897	L1 cell adhesion molecule
ENSG00000013563	9.6861	1.09295	0.236366	4.62398	3.76e-06	1.9e-05	DNASE1L1	1774	deoxyribonuclease 1 like 1
ENSG00000203879	50.6121	1.21946	0.127491	9.56508	1.12e-21	2.82e-20	GDI1	2664	GDP dissociation inhibitor 1
ENSG00000130830	14.0852	-1.03776	0.225411	-4.60388	4.15e-06	2.08e-05	MPP1	4354	membrane palmitoylated protein 1
ENSG00000164825	4.41217	4.87341	0.588389	8.28264	1.2e-16	2.05e-15	DEFB1	1672	defensin beta 1
ENSG00000253230	18.673	7.43085	0.562941	13.2001	8.77e-40	6.51e-38	LINC00599	157627	long intergenic non-protein coding RNA 599
ENSG00000079459	573.472	-1.17092	0.0705977	-16.5858	8.82e-62	2.2e-59	FDFT1	2222	farnesyl-diphosphate farnesyltransferase 1
ENSG00000164733	533.125	1.08778	0.067451	16.127	1.65e-58	3.41e-56	CTSB	1508	cathepsin B
ENSG00000003989	103.066	-0.800735	0.129785	-6.16968	6.84e-10	5.85e-09	SLC7A2	6542	solute carrier family 7 member 2
ENSG00000156011	22.4784	1.20854	0.163574	7.3883	1.49e-13	1.89e-12	PSD3	23362	pleckstrin and Sec7 domain containing 3
ENSG00000147408	10.8622	3.84127	0.33332	11.5243	9.95e-31	4.4e-29	CSGALNACT1	55790	chondroitin sulfate N-acetylgalactosaminyltransferase 1
ENSG00000158806	50.1363	0.735789	0.118138	6.2282	4.72e-10	4.12e-09	NPM2	10361	nucleophosmin/nucleoplasmin 2
ENSG00000158856	73.9954	0.810293	0.111663	7.25656	3.97e-13	4.8e-12	DMTN	2039	dematin actin binding protein
ENSG00000104635	243.861	-1.80849	0.144332	-12.53	5.11e-36	2.97e-34	SLC39A14	23516	solute carrier family 39 member 14
ENSG00000120913	69.9775	-0.833891	0.133125	-6.26396	3.75e-10	3.32e-09	PDLIM2	64236	PDZ and LIM domain 2
ENSG00000134013	2.38304	3.18872	0.600463	5.31044	1.09e-07	7e-07	LOXL2	4017	lysyl oxidase like 2
ENSG00000120885	341.292	-2.35846	0.122235	-19.2945	5.98e-83	3.26e-80	CLU	1191	clusterin
ENSG00000168077	3.78353	-3.69946	0.783258	-4.72316	2.32e-06	1.21e-05	SCARA3	51435	scavenger receptor class A member 3
ENSG00000104290	15.3363	2.30362	0.257138	8.9587	3.29e-19	6.81e-18	FZD3	7976	frizzled class receptor 3
ENSG00000120875	6.43004	3.22558	0.404584	7.9726	1.55e-15	2.42e-14	DUSP4	1846	dual specificity phosphatase 4
ENSG00000104687	526.823	-0.820949	0.0662483	-12.392	2.89e-35	1.6e-33	GSR	2936	glutathione-disulfide reductase
ENSG00000104691	49.4317	-1.00546	0.150606	-6.67614	2.45e-11	2.49e-10	UBXN8	7993	UBX domain protein 8
ENSG00000239039	29.9615	2.04506	0.287533	7.11246	1.14e-12	1.31e-11	SNORD13	692084	small nucleolar RNA, C/D box 13
ENSG00000165046	4.23451	2.34473	0.394231	5.94761	2.72e-09	2.15e-08	LETM2	137994	leucine zipper and EF-hand containing transmembrane protein 2
ENSG00000147526	81.7775	4.47587	0.154398	28.9891	9.02e-185	2.65e-181	TACC1	6867	transforming acidic coiled-coil containing protein 1
ENSG00000176907	52.0924	1.35841	0.1437	9.4531	3.29e-21	7.92e-20	TCIM	56892	transcriptional and immune response regulator
ENSG00000168575	89.1945	-1.20787	0.155165	-7.78441	7e-15	1.02e-13	SLC20A2	6575	solute carrier family 20 member 2
ENSG00000165102	45.6917	0.953162	0.126556	7.53157	5.01e-14	6.76e-13	HGSNAT	138050	heparan-alpha-glucosaminide N-acetyltransferase
ENSG00000104738	395.669	-0.747185	0.0673103	-11.1006	1.25e-28	4.85e-27	MCM4	4173	minichromosome maintenance complex component 4
ENSG00000181690	12.0824	-1.33292	0.25971	-5.13235	2.86e-07	1.72e-06	PLAG1	5324	PLAG1 zinc finger
ENSG00000169122	13.8268	2.36061	0.245264	9.62478	6.28e-22	1.61e-20	FAM110B	90362	family with sequence similarity 110 member B
ENSG00000198363	418.215	1.58029	0.11937	13.2386	5.25e-40	3.98e-38	ASPH	444	aspartate beta-hydroxylase
ENSG00000104205	38.7814	-1.42942	0.170343	-8.39143	4.8e-17	8.48e-16	SGK3	23678	serum/glucocorticoid regulated kinase family member 3
ENSG00000165078	18.1147	1.64975	0.344024	4.79543	1.62e-06	8.7e-06	CPA6	57094	carboxypeptidase A6
ENSG00000140396	31.9033	-0.811581	0.160213	-5.06564	4.07e-07	2.39e-06	NCOA2	10499	nuclear receptor coactivator 2
ENSG00000147592	16.0401	0.953651	0.182321	5.23061	1.69e-07	1.05e-06	LACTB2	51110	lactamase beta 2
ENSG00000121039	28.0177	0.983179	0.159553	6.16211	7.18e-10	6.13e-09	RDH10	157506	retinol dehydrogenase 10
ENSG00000154589	1.36405	2.70819	0.72246	3.74858	0.000177842	0.000655804	LY96	23643	lymphocyte antigen 96
ENSG00000104381	13.7784	-1.93196	0.275016	-7.02489	2.14e-12	2.41e-11	GDAP1	54332	ganglioside induced differentiation associated protein 1
ENSG00000164749	8.09017	-1.87229	0.348522	-5.37208	7.78e-08	5.08e-07	HNF4G	3174	hepatocyte nuclear factor 4 gamma
ENSG00000164683	7.0596	1.521	0.283041	5.37378	7.71e-08	5.04e-07	HEY1	23462	hes related family bHLH transcription factor with YRPW motif 1
ENSG00000147586	77.0562	-0.963741	0.104634	-9.21059	3.24e-20	7.23e-19	MRPS28	28957	mitochondrial ribosomal protein S28
ENSG00000164684	41.8028	0.979055	0.120811	8.10402	5.32e-16	8.62e-15	ZNF704	619279	zinc finger protein 704
ENSG00000164687	61.8931	-1.63756	0.152789	-10.7178	8.4e-27	3e-25	FABP5	2171	fatty acid binding protein 5
ENSG00000164695	71.002	1.04198	0.106434	9.78993	1.24e-22	3.4e-21	CHMP4C	92421	charged multivesicular body protein 4C
ENSG00000104325	73.5251	0.702338	0.105659	6.6472	2.99e-11	3e-10	DECR1	1666	2,4-dienoyl-CoA reductase 1
ENSG00000164953	3.6205	-1.86346	0.493965	-3.77246	0.000161647	0.000599844	TMEM67	91147	transmembrane protein 67
ENSG00000164951	11.0412	1.90819	0.272379	7.00563	2.46e-12	2.75e-11	PDP1	54704	pyruvate dehyrogenase phosphatase catalytic subunit 1
ENSG00000164938	39.3572	1.92427	0.211936	9.07949	1.09e-19	2.32e-18	TP53INP1	94241	tumor protein p53 inducible nuclear protein 1
ENSG00000156172	4.17049	-1.64735	0.432261	-3.811	0.000138405	0.000518833	C8orf37	157657	chromosome 8 open reading frame 37
ENSG00000104356	72.7555	0.972296	0.0933411	10.4166	2.08e-25	6.85e-24	POP1	10940	POP1 homolog, ribonuclease P/MRP subunit
ENSG00000164920	6.21778	1.12576	0.279527	4.02737	5.64e-05	0.000230423	OSR2	116039	odd-skipped related transciption factor 2
ENSG00000034677	82.1396	1.20307	0.0999393	12.038	2.24e-33	1.11e-31	RNF19A	25897	ring finger protein 19A, RBR E3 ubiquitin protein ligase
ENSG00000164932	67.7383	1.88788	0.148216	12.7373	3.67e-37	2.39e-35	CTHRC1	115908	collagen triple helix repeat containing 1
ENSG00000147650	9.47941	1.30355	0.24213	5.38367	7.3e-08	4.79e-07	LRP12	29967	LDL receptor related protein 12
ENSG00000147676	184.787	-1.48705	0.0922232	-16.1245	1.72e-58	3.51e-56	MAL2	114569	mal, T cell differentiation protein 2 (gene/pseudogene)
ENSG00000136999	4.52191	5.78985	0.886318	6.53247	6.47e-11	6.26e-10	CCN3	4856	cellular communication network factor 3
ENSG00000136960	4.5247	-2.00433	0.498439	-4.02122	5.79e-05	0.00023612	ENPP2	5168	ectonucleotide pyrophosphatase/phosphodiesterase 2
ENSG00000155792	2.54437	1.98175	0.491594	4.03127	5.55e-05	0.000227002	DEPTOR	64798	DEP domain containing MTOR interacting protein
ENSG00000172164	245.032	-0.971713	0.203267	-4.78048	1.75e-06	9.32e-06	SNTB1	6641	syntrophin beta 1
ENSG00000165156	44.4202	-1.46007	0.131484	-11.1046	1.19e-28	4.65e-27	ZHX1	11244	zinc fingers and homeoboxes 1
ENSG00000156804	3.28947	3.74326	0.595566	6.28521	3.27e-10	2.91e-09	FBXO32	114907	F-box protein 32
ENSG00000183665	10.7723	1.10836	0.254825	4.34948	1.36e-05	6.22e-05	TRMT12	55039	tRNA methyltransferase 12 homolog
ENSG00000170873	49.0362	-0.987125	0.120403	-8.1985	2.43e-16	4.08e-15	MTSS1	9788	MTSS I-BAR domain containing 1
ENSG00000104549	208.22	-1.63072	0.099777	-16.3437	4.82e-60	1.07e-57	SQLE	6713	squalene epoxidase
ENSG00000173334	243.222	1.68071	0.0634451	26.4908	1.24e-154	2.02e-151	TRIB1	10221	tribbles pseudokinase 1
ENSG00000136997	32.1013	-0.769393	0.191213	-4.02375	5.73e-05	0.000233728	MYC	4609	MYC proto-oncogene, bHLH transcription factor
ENSG00000008513	192.781	-0.916645	0.0778321	-11.7772	5.12e-32	2.36e-30	ST3GAL1	6482	ST3 beta-galactoside alpha-2,3-sialyltransferase 1
ENSG00000104472	72.0455	-0.7543	0.127384	-5.92144	3.19e-09	2.5e-08	CHRAC1	54108	chromatin accessibility complex subunit 1
ENSG00000254338	10.5873	2.28349	0.251477	9.0803	1.08e-19	2.31e-18	MAFA-AS1	104326051	MAFA antisense RNA 1
ENSG00000147804	76.6349	0.727451	0.106997	6.7988	1.05e-11	1.1e-10	SLC39A4	55630	solute carrier family 39 member 4
ENSG00000160948	169.638	1.36174	0.120528	11.2982	1.34e-29	5.56e-28	VPS28	51160	VPS28 subunit of ESCRT-I
ENSG00000080298	22.8927	0.855857	0.187173	4.57254	4.82e-06	2.39e-05	RFX3	5991	regulatory factor X3
ENSG00000096968	12.6455	0.724502	0.20514	3.53175	0.000412817	0.00139947	JAK2	3717	Janus kinase 2
ENSG00000178445	12.9639	-1.60614	0.258862	-6.20463	5.48e-10	4.74e-09	GLDC	2731	glycine decarboxylase
ENSG00000164989	8.54773	0.969447	0.240209	4.03585	5.44e-05	0.000222852	CCDC171	203238	coiled-coil domain containing 171
ENSG00000044459	44.0464	-1.26039	0.137004	-9.19962	3.59e-20	7.93e-19	CNTLN	54875	centlein
ENSG00000155876	324.26	0.777171	0.0760717	10.2163	1.68e-24	5.23e-23	RRAGA	10670	Ras related GTP binding A
ENSG00000147872	2169.33	0.847656	0.0930674	9.10798	8.39e-20	1.8e-18	PLIN2	123	perilipin 2
ENSG00000147889	9.24551	2.94408	0.314999	9.34633	9.07e-21	2.12e-19	CDKN2A	1029	cyclin dependent kinase inhibitor 2A
ENSG00000240498	3.26654	5.30087	0.614514	8.62612	6.35e-18	1.2e-16	CDKN2B-AS1	100048912	CDKN2B antisense RNA 1
ENSG00000147883	15.5446	4.97886	0.415883	11.9718	4.99e-33	2.44e-31	CDKN2B	1030	cyclin dependent kinase inhibitor 2B
ENSG00000234840	2.26659	4.05922	0.641458	6.32811	2.48e-10	2.24e-09	LINC01239	441389	long intergenic non-protein coding RNA 1239
ENSG00000107262	143.042	-0.818389	0.0873486	-9.36923	7.31e-21	1.72e-19	BAG1	573	BCL2 associated athanogene 1
ENSG00000164978	49.7617	0.733542	0.116256	6.3097	2.8e-10	2.5e-09	NUDT2	318	nudix hydrolase 2
ENSG00000164970	64.3437	0.757675	0.0991401	7.64248	2.13e-14	2.98e-13	FAM219A	203259	family with sequence similarity 219 member A
ENSG00000005238	8.6155	1.48831	0.276876	5.37538	7.64e-08	5e-07	FAM214B	80256	family with sequence similarity 214 member B
ENSG00000137135	13.4409	-0.932737	0.242676	-3.84354	0.000121272	0.000459765	ARHGEF39	84904	Rho guanine nucleotide exchange factor 39
ENSG00000198467	10.98	0.896374	0.222494	4.02876	5.61e-05	0.000229248	TPM2	7169	tropomyosin 2
ENSG00000122707	4.74591	-3.68854	0.701117	-5.26094	1.43e-07	9.03e-07	RECK	8434	reversion inducing cysteine rich protein with kazal motifs
ENSG00000159921	40.1243	-0.792872	0.177333	-4.47108	7.78e-06	3.72e-05	GNE	10020	glucosamine (UDP-N-acetyl)-2-epimerase/N-acetylmannosamine kinase
ENSG00000165304	43.0819	-1.13589	0.150169	-7.56408	3.91e-14	5.3e-13	MELK	9833	maternal embryonic leucine zipper kinase
ENSG00000165275	27.2705	0.712303	0.142424	5.00129	5.69e-07	3.27e-06	TRMT10B	158234	tRNA methyltransferase 10B
ENSG00000238113	4.12038	1.3783	0.357821	3.85194	0.000117187	0.000445771	LINC01410	103352539	long intergenic non-protein coding RNA 1410
ENSG00000107242	8.70868	-1.156	0.300832	-3.84268	0.000121696	0.000461135	PIP5K1B	8395	phosphatidylinositol-4-phosphate 5-kinase type 1 beta
ENSG00000119138	17.0457	1.11906	0.183848	6.08687	1.15e-09	9.58e-09	KLF9	687	Kruppel like factor 9
ENSG00000135048	452.588	0.788893	0.109415	7.21012	5.59e-13	6.67e-12	CEMIP2	23670	cell migration inducing hyaluronidase 2
ENSG00000119125	2.60817	2.07616	0.499156	4.15934	3.19e-05	0.000135932	GDA	9615	guanine deaminase
ENSG00000107372	165.135	0.76646	0.0993786	7.71252	1.23e-14	1.77e-13	ZFAND5	7763	zinc finger AN1-type containing 5
ENSG00000165092	336.233	-0.708999	0.0786956	-9.00938	2.07e-19	4.35e-18	ALDH1A1	216	aldehyde dehydrogenase 1 family member A1
ENSG00000106733	4.65189	1.15482	0.342904	3.36777	0.000757778	0.00242733	NMRK1	54981	nicotinamide riboside kinase 1
ENSG00000099139	11.7982	2.24469	0.2846	7.88716	3.09e-15	4.67e-14	PCSK5	5125	proprotein convertase subtilisin/kexin type 5
ENSG00000156052	85.6415	-0.830357	0.0950081	-8.73985	2.33e-18	4.56e-17	GNAQ	2776	G protein subunit alpha q
ENSG00000196781	302.635	-0.781825	0.0790901	-9.88524	4.82e-23	1.35e-21	TLE1	7088	TLE family member 1, transcriptional corepressor
ENSG00000172159	7.99812	1.50906	0.264026	5.71558	1.09e-08	8.02e-08	FRMD3	257019	FERM domain containing 3
ENSG00000165115	9.09375	1.06899	0.235875	4.53202	5.84e-06	2.86e-05	KIF27	55582	kinesin family member 27
ENSG00000178966	25.8045	-0.829254	0.169026	-4.90607	9.29e-07	5.16e-06	RMI1	80010	RecQ mediated genome instability 1
ENSG00000135052	2.40849	1.80572	0.508347	3.55214	0.000382108	0.0013066	GOLM1	51280	golgi membrane protein 1
ENSG00000196730	18.629	-1.82588	0.243747	-7.49086	6.84e-14	9.09e-13	DAPK1	1612	death associated protein kinase 1
ENSG00000185920	9.24099	1.2213	0.29794	4.09915	4.15e-05	0.000173241	PTCH1	5727	patched 1
ENSG00000165244	18.341	-0.72419	0.204695	-3.5379	0.000403318	0.00137042	ZNF367	195828	zinc finger protein 367
ENSG00000136943	27.1891	-1.18175	0.175031	-6.75162	1.46e-11	1.51e-10	CTSV	1515	cathepsin V
ENSG00000106785	34.3215	-1.05217	0.147086	-7.15343	8.46e-13	9.85e-12	TRIM14	9830	tripartite motif containing 14
ENSG00000106799	28.4062	-0.833726	0.162617	-5.12691	2.95e-07	1.77e-06	TGFBR1	7046	transforming growth factor beta receptor 1
ENSG00000106803	364.053	-0.706379	0.175743	-4.01939	5.83e-05	0.000237693	SEC61B	10952	SEC61 translocon beta subunit
ENSG00000148123	35.2234	0.796191	0.144634	5.50487	3.69e-08	2.53e-07	PLPPR1	54886	phospholipid phosphatase related 1
ENSG00000136783	16.6535	-0.933273	0.201355	-4.63496	3.57e-06	1.81e-05	NIPSNAP3A	25934	nipsnap homolog 3A
ENSG00000070214	185.06	-0.860007	0.090678	-9.48418	2.44e-21	5.9e-20	SLC44A1	23446	solute carrier family 44 member 1
ENSG00000243444	1.94744	3.54472	0.650102	5.45255	4.97e-08	3.34e-07	PALM2AKAP2	445815	PALM2 and AKAP2 fusion
ENSG00000106853	73.2209	-2.07981	0.187103	-11.1159	1.05e-28	4.11e-27	PTGR1	22949	prostaglandin reductase 1
ENSG00000165188	4.32029	1.72255	0.397052	4.33836	1.44e-05	6.53e-05	RNF183	138065	ring finger protein 183
ENSG00000148225	9.36813	0.856682	0.246028	3.48205	0.00049759	0.00165893	WDR31	114987	WD repeat domain 31
ENSG00000138835	31.6707	1.03505	0.138166	7.49134	6.82e-14	9.07e-13	RGS3	5998	regulator of G protein signaling 3
ENSG00000229314	165.319	-0.757309	0.126456	-5.98871	2.12e-09	1.7e-08	ORM1	5004	orosomucoid 1
ENSG00000228278	372.556	-0.831933	0.113934	-7.30188	2.84e-13	3.5e-12	ORM2	5005	orosomucoid 2
ENSG00000157693	12.1737	0.832773	0.202806	4.10625	4.02e-05	0.000168389	TMEM268	203197	transmembrane protein 268
ENSG00000182752	5.05718	-1.6103	0.427959	-3.76274	0.000168061	0.000621763	PAPPA	5069	pappalysin 1
ENSG00000119403	59.0468	-0.892343	0.107474	-8.30285	1.02e-16	1.75e-15	PHF19	26147	PHD finger protein 19
ENSG00000106804	301.575	-0.982032	0.107876	-9.10335	8.76e-20	1.87e-18	C5	727	complement C5
ENSG00000148175	136.576	-0.853477	0.0815944	-10.46	1.32e-25	4.36e-24	STOM	2040	stomatin
ENSG00000148200	365.388	-1.19856	0.115383	-10.3877	2.82e-25	9.2e-24	NR6A1	2649	nuclear receptor subfamily 6 group A member 1
ENSG00000136856	368.479	0.771757	0.0885813	8.71241	2.97e-18	5.8e-17	SLC2A8	29988	solute carrier family 2 member 8
ENSG00000187024	13.2377	0.759492	0.201569	3.7679	0.000164626	0.000609974	PTRH1	138428	peptidyl-tRNA hydrolase 1 homolog
ENSG00000106991	4.43802	1.66111	0.368524	4.50746	6.56e-06	3.18e-05	ENG	2022	endoglin
ENSG00000167106	153.81	1.4435	0.103786	13.9084	5.63e-44	5.49e-42	FAM102A	399665	family with sequence similarity 102 member A
ENSG00000175287	29.4057	-1.39814	0.177969	-7.85609	3.96e-15	5.94e-14	PHYHD1	254295	phytanoyl-CoA dioxygenase domain containing 1
ENSG00000148341	32.0199	0.8245	0.134869	6.11336	9.76e-10	8.19e-09	SH3GLB2	56904	SH3 domain containing GRB2 like, endophilin B2
ENSG00000167130	66.7352	-1.02894	0.10799	-9.52808	1.6e-21	3.94e-20	DOLPP1	57171	dolichyldiphosphatase 1
ENSG00000188483	6.31507	1.86222	0.299274	6.22247	4.89e-10	4.27e-09	IER5L	389792	immediate early response 5 like
ENSG00000136878	12.4629	0.77738	0.218426	3.559	0.000372263	0.00127551	USP20	10868	ubiquitin specific peptidase 20
ENSG00000187239	90.3625	-1.26124	0.0983235	-12.8274	1.15e-37	7.73e-36	FNBP1	23048	formin binding protein 1
ENSG00000130707	22.624	-0.705954	0.166879	-4.23035	2.33e-05	0.000101913	ASS1	445	argininosuccinate synthase 1
ENSG00000130720	3.14368	4.12844	0.636582	6.48532	8.85e-11	8.43e-10	FIBCD1	84929	fibrinogen C domain containing 1
ENSG00000225756	10.7761	-1.83228	0.288971	-6.3407	2.29e-10	2.07e-09	DBH-AS1	138948	DBH antisense RNA 1
ENSG00000123453	25.1335	-1.00013	0.161137	-6.20672	5.41e-10	4.68e-09	SARDH	1757	sarcosine dehydrogenase
ENSG00000225361	8.08145	-1.08484	0.304046	-3.568	0.000359719	0.0012383	PPP1R26-AS1	100506599	PPP1R26 antisense RNA 1
ENSG00000122133	10.619	5.39218	0.536373	10.053	8.91e-24	2.61e-22	PAEP	5047	progestagen associated endometrial protein
ENSG00000165643	5.31522	1.2994	0.318308	4.08222	4.46e-05	0.000185364	SOHLH1	402381	spermatogenesis and oogenesis specific basic helix-loop-helix 1
ENSG00000160360	6.808	2.13884	0.303559	7.04585	1.84e-12	2.09e-11	GPSM1	26086	G protein signaling modulator 1
ENSG00000165689	166.044	-0.781105	0.119676	-6.52685	6.72e-11	6.47e-10	ENTR1	10807	endosome associated trafficking regulator 1
ENSG00000233016	127.03	-0.892792	0.0958062	-9.31873	1.18e-20	2.71e-19	SNHG7	84973	small nucleolar RNA host gene 7
ENSG00000213213	33.7291	-1.74731	0.196055	-8.91234	5e-19	1.02e-17	CCDC183	84960	coiled-coil domain containing 183
ENSG00000148362	15.8693	-0.827961	0.207607	-3.98812	6.66e-05	0.000267964	PAXX	286257	PAXX non-homologous end joining factor
ENSG00000180549	1.48864	-3.44673	0.832433	-4.14055	3.46e-05	0.000146709	FUT7	2529	fucosyltransferase 7
ENSG00000186193	147.915	-0.850989	0.0828081	-10.2766	8.98e-25	2.86e-23	SAPCD2	89958	suppressor APC domain containing 2
ENSG00000197355	23.7925	-1.11021	0.181494	-6.11705	9.53e-10	8.02e-09	UAP1L1	91373	UDP-N-acetylglucosamine pyrophosphorylase 1 like 1
ENSG00000198435	38.7082	-0.939954	0.148908	-6.31233	2.75e-10	2.46e-09	NRARP	441478	NOTCH regulated ankyrin repeat protein
ENSG00000165802	243.467	-0.786142	0.153292	-5.12839	2.92e-07	1.75e-06	NSMF	26012	NMDA receptor synaptonuclear signaling and neuronal migration factor
ENSG00000130653	3.99983	-1.68959	0.461957	-3.65746	0.000254731	0.000905151	PNPLA7	375775	patatin like phospholipase domain containing 7
ENSG00000180525	4.42469	1.32984	0.337632	3.93871	8.19e-05	0.000322637	PRR26	414235	proline rich 26
ENSG00000067064	126.672	-1.63243	0.202608	-8.05707	7.81e-16	1.25e-14	IDI1	3422	isopentenyl-diphosphate delta isomerase 1
ENSG00000067082	321.635	0.764245	0.0569092	13.4292	4.08e-41	3.33e-39	KLF6	1316	Kruppel like factor 6
ENSG00000231298	4.29764	5.03731	0.607558	8.29107	1.12e-16	1.92e-15	MANCR	100216001	mitotically associated long non coding RNA
ENSG00000187134	1417.89	-1.76383	0.0864469	-20.4037	1.55e-92	9.92e-90	AKR1C1	1645	aldo-keto reductase family 1 member C1
ENSG00000151632	1080.25	-3.54658	0.0642652	-55.1867	0	0	AKR1C2	1646	aldo-keto reductase family 1 member C2
ENSG00000196372	14.2067	0.847365	0.193531	4.37844	1.2e-05	5.49e-05	ASB13	79754	ankyrin repeat and SOCS box containing 13
ENSG00000151655	458.152	-1.69887	0.117441	-14.4657	2e-47	2.33e-45	ITIH2	3698	inter-alpha-trypsin inhibitor heavy chain 2
ENSG00000148429	50.8639	0.704032	0.113346	6.21132	5.25e-10	4.56e-09	USP6NL	9712	USP6 N-terminal like
ENSG00000065665	21.6321	0.735493	0.156261	4.70682	2.52e-06	1.31e-05	SEC61A2	55176	SEC61 translocon alpha 2 subunit
ENSG00000151474	3.9748	-1.76793	0.480862	-3.67658	0.00023638	0.000848474	FRMD4A	55691	FERM domain containing 4A
ENSG00000165996	43.8562	-0.956788	0.132651	-7.21283	5.48e-13	6.55e-12	HACD1	9200	3-hydroxyacyl-CoA dehydratase 1
ENSG00000148444	76.6866	0.799438	0.0977292	8.18014	2.84e-16	4.71e-15	COMMD3	23412	COMM domain containing 3
ENSG00000148450	25.1656	1.3981	0.175288	7.97604	1.51e-15	2.36e-14	MSRB2	22921	methionine sulfoxide reductase B2
ENSG00000107863	118.055	0.868857	0.0826585	10.5114	7.65e-26	2.57e-24	ARHGAP21	57584	Rho GTPase activating protein 21
ENSG00000185875	7.30584	1.88519	0.306747	6.14575	7.96e-10	6.78e-09	THNSL1	79896	threonine synthase like 1
ENSG00000150054	11.2049	-2.29244	0.32134	-7.134	9.75e-13	1.13e-11	MPP7	143098	membrane palmitoylated protein 7
ENSG00000095739	41.0063	2.38297	0.156081	15.2675	1.26e-52	1.91e-50	BAMBI	25805	BMP and activin membrane bound inhibitor
ENSG00000120616	146.477	0.813041	0.0755379	10.7633	5.13e-27	1.85e-25	EPC1	80314	enhancer of polycomb homolog 1
ENSG00000150093	394.133	0.797039	0.0596515	13.3616	1.01e-40	7.93e-39	ITGB1	3688	integrin subunit beta 1
ENSG00000099250	46.6301	1.29598	0.192803	6.72179	1.79e-11	1.84e-10	NRP1	8829	neuropilin 1
ENSG00000175395	8.37097	0.949627	0.255783	3.71263	0.000205118	0.00074407	ZNF25	219749	zinc finger protein 25
ENSG00000169740	16.8048	1.15871	0.182402	6.35249	2.12e-10	1.93e-09	ZNF32	7580	zinc finger protein 32
ENSG00000165512	4.45914	-1.87105	0.472964	-3.95601	7.62e-05	0.000302252	ZNF22	7570	zinc finger protein 22
ENSG00000148584	345.916	-1.04961	0.0797563	-13.1603	1.49e-39	1.09e-37	A1CF	29974	APOBEC1 complementation factor
ENSG00000107984	265.987	-1.20382	0.113856	-10.5732	3.97e-26	1.35e-24	DKK1	22943	dickkopf WNT signaling pathway inhibitor 1
ENSG00000231131	1.77457	2.90023	0.635784	4.56166	5.08e-06	2.51e-05	LNCAROD	101928687	lncRNA activating regulator of DKK1
ENSG00000108064	361.753	-0.936491	0.0733954	-12.7595	2.76e-37	1.82e-35	TFAM	7019	transcription factor A, mitochondrial
ENSG00000122870	26.5282	-2.3346	0.224303	-10.4082	2.27e-25	7.46e-24	BICC1	80114	BicC family RNA binding protein 1
ENSG00000182010	58.4752	-1.04663	0.1294	-8.08833	6.05e-16	9.76e-15	RTKN2	219790	rhotekin 2
ENSG00000108176	8.18963	2.87697	0.313361	9.181	4.27e-20	9.4e-19	DNAJC12	56521	DnaJ heat shock protein family (Hsp40) member C12
ENSG00000108187	10.9651	1.12322	0.222494	5.04832	4.46e-07	2.6e-06	PBLD	64081	phenazine biosynthesis like protein domain containing
ENSG00000138336	98.307	-1.64713	0.120207	-13.7024	9.82e-43	8.97e-41	TET1	80312	tet methylcytosine dioxygenase 1
ENSG00000156515	6.77058	1.58534	0.295513	5.3647	8.11e-08	5.27e-07	HK1	3098	hexokinase 1
ENSG00000099284	41.2042	-1.50195	0.156159	-9.6181	6.71e-22	1.71e-20	MACROH2A2	55506	macroH2A.2 histone
ENSG00000107719	6.28661	5.61203	0.625056	8.97844	2.75e-19	5.73e-18	PALD1	27143	phosphatase domain containing paladin 1
ENSG00000180644	29.458	4.70593	0.445314	10.5677	4.21e-26	1.43e-24	PRF1	5551	perforin 1
ENSG00000138316	2.26227	4.78388	0.706346	6.77271	1.26e-11	1.32e-10	ADAMTS14	140766	ADAM metallopeptidase with thrombospondin type 1 motif 14
ENSG00000166224	124.372	1.20675	0.0904668	13.3392	1.37e-40	1.07e-38	SGPL1	8879	sphingosine-1-phosphate lyase 1
ENSG00000107742	200.286	1.25143	0.104744	11.9476	6.69e-33	3.2e-31	SPOCK2	9806	SPARC (osteonectin), cwcv and kazal like domains proteoglycan 2
ENSG00000168209	137.038	-1.16658	0.127563	-9.14514	5.96e-20	1.29e-18	DDIT4	54541	DNA damage inducible transcript 4
ENSG00000138308	17.6451	-1.87376	0.226885	-8.25864	1.47e-16	2.49e-15	PLA2G12B	84647	phospholipase A2 group XIIB
ENSG00000122884	280.852	-1.31226	0.128799	-10.1884	2.23e-24	6.87e-23	P4HA1	5033	prolyl 4-hydroxylase subunit alpha 1
ENSG00000107758	106.189	1.16859	0.115894	10.0833	6.55e-24	1.95e-22	PPP3CB	5532	protein phosphatase 3 catalytic subunit beta
ENSG00000196968	131.13	-0.895315	0.109577	-8.17068	3.07e-16	5.07e-15	FUT11	170384	fucosyltransferase 11
ENSG00000122861	2.88626	3.74337	0.659267	5.67807	1.36e-08	9.9e-08	PLAU	5328	plasminogen activator, urokinase
ENSG00000156110	93.9045	-0.817931	0.0932067	-8.77545	1.7e-18	3.35e-17	ADK	132	adenosine kinase
ENSG00000165655	284.878	0.951886	0.0831127	11.453	2.27e-30	9.89e-29	ZNF503	84858	zinc finger protein 503
ENSG00000224596	4.0439	2.23629	0.410685	5.44527	5.17e-08	3.47e-07	ZMIZ1-AS1	283050	ZMIZ1 antisense RNA 1
ENSG00000151224	248.193	-2.19075	0.117585	-18.6312	1.79e-77	7.13e-75	MAT1A	4143	methionine adenosyltransferase 1A
ENSG00000148672	491.54	-0.872525	0.0858166	-10.1673	2.77e-24	8.43e-23	GLUD1	2746	glutamate dehydrogenase 1
ENSG00000138134	5.57724	2.92357	0.388726	7.52091	5.44e-14	7.32e-13	STAMBPL1	57559	STAM binding protein like 1
ENSG00000107796	87.2994	0.952541	0.143796	6.62427	3.49e-11	3.48e-10	ACTA2	59	actin alpha 2, smooth muscle
ENSG00000026103	7.50764	1.01647	0.259794	3.91261	9.13e-05	0.000356152	FAS	355	Fas cell surface death receptor
ENSG00000152782	39.0732	-0.72413	0.141234	-5.12715	2.94e-07	1.76e-06	PANK1	53354	pantothenate kinase 1
ENSG00000148677	1220.81	1.90714	0.101054	18.8725	1.92e-79	8.31e-77	ANKRD1	27063	ankyrin repeat domain 1
ENSG00000152804	98.8369	-1.05809	0.0993206	-10.6533	1.68e-26	5.87e-25	HHEX	3087	hematopoietically expressed homeobox
ENSG00000138190	27.9225	-0.775175	0.160389	-4.83309	1.34e-06	7.29e-06	EXOC6	54536	exocyst complex component 6
ENSG00000138207	1217.09	-1.46941	0.13251	-11.089	1.42e-28	5.49e-27	RBP4	5950	retinol binding protein 4
ENSG00000095637	41.3519	0.734619	0.128716	5.70727	1.15e-08	8.4e-08	SORBS1	10580	sorbin and SH3 domain containing 1
ENSG00000213390	16.1865	-0.968411	0.209037	-4.63273	3.61e-06	1.83e-05	ARHGAP19	84986	Rho GTPase activating protein 19
ENSG00000107554	81.8048	0.773348	0.100502	7.69487	1.42e-14	2.02e-13	DNMBP	23268	dynamin binding protein
ENSG00000099194	1723	-1.29595	0.110232	-11.7566	6.53e-32	3e-30	SCD	6319	stearoyl-CoA desaturase
ENSG00000107819	53.8652	1.72208	0.115988	14.8471	7.27e-50	9.37e-48	SFXN3	81855	sideroflexin 3
ENSG00000107833	709.027	-0.711833	0.0713273	-9.9798	1.87e-23	5.34e-22	NPM3	10360	nucleophosmin/nucleoplasmin 3
ENSG00000107874	6.908	1.17173	0.288692	4.05876	4.93e-05	0.000203297	CUEDC2	79004	CUE domain containing 2
ENSG00000269609	31.9144	-0.956953	0.155972	-6.13543	8.49e-10	7.21e-09	RPARP-AS1	100505761	RPARP antisense RNA 1
ENSG00000166272	53.7406	0.895535	0.11092	8.07373	6.82e-16	1.1e-14	WBP1L	54838	WW domain binding protein 1 like
ENSG00000148842	18.4199	-1.53126	0.218927	-6.99437	2.66e-12	2.97e-11	CNNM2	54805	cyclin and CBS domain divalent metal cation transport mediator 2
ENSG00000107960	24.8301	0.819922	0.150964	5.43125	5.6e-08	3.72e-07	STN1	79991	STN1 subunit of CST complex
ENSG00000148841	38.8003	1.40512	0.131623	10.6753	1.33e-26	4.66e-25	ITPRIP	85450	inositol 1,4,5-trisphosphate receptor interacting protein
ENSG00000138166	23.0529	3.71266	0.244905	15.1596	6.55e-52	9.73e-50	DUSP5	1847	dual specificity phosphatase 5
ENSG00000150593	84.207	0.897629	0.0910177	9.86215	6.07e-23	1.69e-21	PDCD4	27250	programmed cell death 4
ENSG00000119927	264.683	-1.01586	0.0798455	-12.7228	4.42e-37	2.86e-35	GPAM	57678	glycerol-3-phosphate acyltransferase, mitochondrial
ENSG00000197142	50.6599	0.700178	0.116479	6.01122	1.84e-09	1.49e-08	ACSL5	51703	acyl-CoA synthetase long chain family member 5
ENSG00000198924	12.6859	-0.822284	0.225286	-3.64995	0.000262287	0.000927878	DCLRE1A	9937	DNA cross-link repair 1A
ENSG00000099204	550.91	0.776208	0.0714725	10.8602	1.78e-27	6.61e-26	ABLIM1	3983	actin binding LIM protein 1
ENSG00000165868	18.9983	0.7308	0.172251	4.24265	2.21e-05	9.69e-05	HSPA12A	259217	heat shock protein family A (Hsp70) member 12A
ENSG00000207468	5.8268	-2.0177	0.408499	-4.93932	7.84e-07	4.41e-06	SNORA19	641451	small nucleolar RNA, H/ACA box 19
ENSG00000165672	181.629	-0.979022	0.135529	-7.22372	5.06e-13	6.07e-12	PRDX3	10935	peroxiredoxin 3
ENSG00000198873	135.435	0.845764	0.115696	7.31022	2.67e-13	3.3e-12	GRK5	2869	G protein-coupled receptor kinase 5
ENSG00000148908	20.2362	2.96181	0.237479	12.4719	1.06e-35	6.08e-34	RGS10	6001	regulator of G protein signaling 10
ENSG00000066468	3.30154	-3.13627	0.707311	-4.43407	9.25e-06	4.35e-05	FGFR2	2263	fibroblast growth factor receptor 2
ENSG00000138162	54.9283	0.77657	0.119319	6.50834	7.6e-11	7.28e-10	TACC2	10579	transforming acidic coiled-coil containing protein 2
ENSG00000138152	8.56159	0.987174	0.257176	3.83851	0.000123785	0.000468084	BTBD16	118663	BTB domain containing 16
ENSG00000166033	2.7409	2.73988	0.530556	5.16417	2.42e-07	1.47e-06	HTRA1	5654	HtrA serine peptidase 1
ENSG00000196177	270.603	-0.819404	0.121635	-6.73656	1.62e-11	1.67e-10	ACADSB	36	acyl-CoA dehydrogenase short/branched chain
ENSG00000182022	83.7738	-1.09166	0.152439	-7.1613	7.99e-13	9.34e-12	CHST15	51363	carbohydrate sulfotransferase 15
ENSG00000176171	158.254	-0.79646	0.118957	-6.69539	2.15e-11	2.19e-10	BNIP3	664	BCL2 interacting protein 3
ENSG00000171813	36.9608	0.894202	0.138684	6.44777	1.14e-10	1.07e-09	PWWP2B	170394	PWWP domain containing 2B
ENSG00000185201	259.677	2.00366	0.178255	11.2404	2.58e-29	1.06e-27	IFITM2	10581	interferon induced transmembrane protein 2
ENSG00000142089	257.741	0.715244	0.0826144	8.65762	4.82e-18	9.22e-17	IFITM3	10410	interferon induced transmembrane protein 3
ENSG00000247095	6.10136	-1.27969	0.33574	-3.81154	0.000138105	0.000517839	MIR210HG	100506211	MIR210 host gene
ENSG00000177042	18.8129	1.35521	0.181897	7.4504	9.31e-14	1.22e-12	TMEM80	283232	transmembrane protein 80
ENSG00000130598	718.45	1.94586	0.0815252	23.8682	6.55e-126	7.41e-123	TNNI2	7136	troponin I2, fast skeletal type
ENSG00000130592	33.9154	3.79778	0.322088	11.7911	4.34e-32	2.01e-30	LSP1	4046	lymphocyte specific protein 1
ENSG00000226416	10.0089	0.939673	0.251003	3.74368	0.000181345	0.000666382	MRPL23-AS1	100133545	MRPL23 antisense RNA 1
ENSG00000130600	3.88213	1.7405	0.40751	4.27105	1.95e-05	8.62e-05	H19	283120	H19 imprinted maternally expressed transcript
ENSG00000167244	209.799	-0.829177	0.11958	-6.93408	4.09e-12	4.48e-11	IGF2	3481	insulin like growth factor 2
ENSG00000180176	3.46905	5.16938	0.650179	7.9507	1.85e-15	2.86e-14	TH	7054	tyrosine hydroxylase
ENSG00000269821	709.561	-0.799239	0.102751	-7.77839	7.35e-15	1.07e-13	KCNQ1OT1	10984	KCNQ1 opposite strand/antisense transcript 1
ENSG00000181649	63.6465	0.953657	0.104894	9.09162	9.76e-20	2.08e-18	PHLDA2	7262	pleckstrin homology like domain family A member 2
ENSG00000177105	46.2405	0.721721	0.141347	5.10601	3.29e-07	1.96e-06	RHOG	391	ras homolog family member G
ENSG00000166311	25.5685	0.813119	0.154609	5.25921	1.45e-07	9.1e-07	SMPD1	6609	sphingomyelin phosphodiesterase 1
ENSG00000110169	11.359	-1.29969	0.284797	-4.56357	5.03e-06	2.49e-05	HPX	3263	hemopexin
ENSG00000166402	12.8271	-1.94182	0.281299	-6.90305	5.09e-12	5.52e-11	TUB	7275	TUB bipartite transcription factor
ENSG00000175348	203.543	0.7317	0.0600373	12.1874	3.63e-34	1.88e-32	TMEM9B	56674	TMEM9 domain family member B
ENSG00000201998	1.39658	-2.9401	0.849704	-3.46014	0.000539891	0.00178579	SNORA23	677808	small nucleolar RNA, H/ACA box 23
ENSG00000166483	68.9239	-0.921481	0.120729	-7.63265	2.3e-14	3.2e-13	WEE1	7465	WEE1 G2 checkpoint kinase
ENSG00000133812	29.1396	-0.939396	0.153217	-6.13116	8.72e-10	7.39e-09	SBF2	81846	SET binding factor 2
ENSG00000133805	2.56676	3.31364	0.607895	5.45101	5.01e-08	3.36e-07	AMPD3	272	adenosine monophosphate deaminase 3
ENSG00000133800	3.19975	4.84238	0.605957	7.99131	1.34e-15	2.09e-14	LYVE1	10894	lymphatic vessel endothelial hyaluronan receptor 1
ENSG00000072952	1.39081	2.73196	0.672465	4.0626	4.85e-05	0.000200525	MRVI1	10335	murine retrovirus integration site 1 homolog
ENSG00000133816	3.51412	3.15958	0.499481	6.32572	2.52e-10	2.27e-09	MICAL2	9645	microtubule associated monooxygenase, calponin and LIM domain containing 2
ENSG00000197702	25.3269	0.983935	0.164381	5.98569	2.15e-09	1.73e-08	PARVA	55742	parvin alpha
ENSG00000186104	2.64282	-2.79705	0.703338	-3.97683	6.98e-05	0.000279936	CYP2R1	120227	cytochrome P450 family 2 subfamily R member 1
ENSG00000110693	2.60725	2.27369	0.522913	4.34812	1.37e-05	6.26e-05	SOX6	55553	SRY-box transcription factor 6
ENSG00000184669	13.0885	1.31154	0.205622	6.3784	1.79e-10	1.64e-09	OR7E14P	10819	olfactory receptor family 7 subfamily E member 14 pseudogene
ENSG00000188211	28.063	-1.45765	0.170511	-8.5487	1.24e-17	2.3e-16	NCR3LG1	374383	natural killer cell cytotoxicity receptor 3 ligand 1
ENSG00000148965	12.1571	-1.46418	0.273456	-5.35435	8.59e-08	5.57e-07	SAA4	6291	serum amyloid A4, constitutive
ENSG00000151116	60.5374	0.845122	0.0996107	8.48425	2.17e-17	3.92e-16	UEVLD	55293	UEV and lactate/malate dehyrogenase domains
ENSG00000247595	13.0905	1.12381	0.220316	5.10091	3.38e-07	2.01e-06	SPTY2D1OS	100506540	SPTY2D1 opposite strand
ENSG00000129173	16.1032	-0.840358	0.215568	-3.89835	9.69e-05	0.000375943	E2F8	79733	E2F transcription factor 8
ENSG00000166833	162.698	-2.00708	0.137146	-14.6346	1.69e-48	2.07e-46	NAV2	89797	neuron navigator 2
ENSG00000148935	21.0054	-1.57592	0.205582	-7.66563	1.78e-14	2.5e-13	GAS2	2620	growth arrest specific 2
ENSG00000007372	15.5347	3.52902	0.446773	7.8989	2.81e-15	4.27e-14	PAX6	5080	paired box 6
ENSG00000049449	48.3883	0.763911	0.124111	6.15508	7.5e-10	6.4e-09	RCN1	5954	reticulocalbin 1
ENSG00000110427	1.68339	3.58971	0.760284	4.72154	2.34e-06	1.22e-05	KIAA1549L	25758	KIAA1549 like
ENSG00000085063	310.474	1.22428	0.0820683	14.9178	2.53e-50	3.44e-48	CD59	966	CD59 molecule (CD59 blood group)
ENSG00000135363	1.15077	4.01049	0.774771	5.17636	2.26e-07	1.38e-06	LMO2	4005	LIM domain only 2
ENSG00000166016	34.6365	0.803805	0.160869	4.99665	5.83e-07	3.34e-06	ABTB2	25841	ankyrin repeat and BTB domain containing 2
ENSG00000135374	4.95127	3.76515	0.470307	8.00572	1.19e-15	1.87e-14	ELF5	2001	E74 like ETS transcription factor 5
ENSG00000149089	31.3374	-1.39289	0.231125	-6.02659	1.67e-09	1.37e-08	APIP	51074	APAF1 interacting protein
ENSG00000110436	18.6945	-2.1046	0.275737	-7.63263	2.3e-14	3.2e-13	SLC1A2	6506	solute carrier family 1 member 2
ENSG00000135362	1.28878	3.68332	0.785025	4.69198	2.71e-06	1.4e-05	PRR5L	79899	proline rich 5 like
ENSG00000166352	16.0009	0.804186	0.198689	4.04745	5.18e-05	0.000212694	C11orf74	119710	chromosome 11 open reading frame 74
ENSG00000149084	228.33	-0.736077	0.0788902	-9.3304	1.05e-20	2.45e-19	HSD17B12	51144	hydroxysteroid 17-beta dehydrogenase 12
ENSG00000187479	1.88788	2.21791	0.557078	3.98133	6.85e-05	0.000274985	C11orf96	387763	chromosome 11 open reading frame 96
ENSG00000085117	2.01043	3.85629	0.787303	4.8981	9.68e-07	5.36e-06	CD82	3732	CD82 molecule
ENSG00000019505	1.07694	3.66078	0.784046	4.6691	3.03e-06	1.55e-05	SYT13	57586	synaptotagmin 13
ENSG00000135365	34.5496	1.32714	0.147442	9.00107	2.24e-19	4.69e-18	PHF21A	51317	PHD finger protein 21A
ENSG00000156587	8.97726	1.1139	0.246279	4.52291	6.1e-06	2.97e-05	UBE2L6	9246	ubiquitin conjugating enzyme E2 L6
ENSG00000149131	14.4368	-1.83952	0.263844	-6.97201	3.12e-12	3.44e-11	SERPING1	710	serpin family G member 1
ENSG00000110031	2.26341	1.84115	0.501417	3.67189	0.000240766	0.000861485	LPXN	9404	leupaxin
ENSG00000110042	28.5557	-1.13399	0.181892	-6.2344	4.54e-10	3.98e-09	DTX4	23220	deltex E3 ubiquitin ligase 4
ENSG00000162144	27.4013	1.14586	0.152223	7.52752	5.17e-14	6.96e-13	CYB561A3	220002	cytochrome b561 family member A3
ENSG00000187049	5.96318	-2.24449	0.466228	-4.81414	1.48e-06	7.98e-06	TMEM216	51259	transmembrane protein 216
ENSG00000167985	124.773	0.782082	0.0806809	9.69353	3.21e-22	8.42e-21	SDHAF2	54949	succinate dehydrogenase complex assembly factor 2
ENSG00000134824	81.0834	-2.39568	0.131438	-18.2267	3.17e-74	1.16e-71	FADS2	9415	fatty acid desaturase 2
ENSG00000149485	498.931	-1.10238	0.0689319	-15.9923	1.45e-57	2.76e-55	FADS1	3992	fatty acid desaturase 1
ENSG00000167996	4672.71	-1.02552	0.0369633	-27.7443	2.04e-169	4.29e-166	FTH1	2495	ferritin heavy chain 1
ENSG00000149480	59.4951	0.809025	0.148263	5.45669	4.85e-08	3.27e-07	MTA2	9219	metastasis associated 1 family member 2
ENSG00000149489	5.07079	1.0483	0.311635	3.36387	0.000768573	0.0024587	ROM1	6094	retinal outer segment membrane protein 1
ENSG00000149742	3.0011	-2.25287	0.609677	-3.69518	0.00021973	0.000792192	SLC22A9	114571	solute carrier family 22 member 9
ENSG00000176485	49.9122	-2.51015	0.158963	-15.7908	3.6e-56	6.62e-54	PLAAT3	11145	phospholipase A and acyltransferase 3
ENSG00000256940	4.07837	1.40237	0.378975	3.70042	0.000215242	0.000777347	PPP1R14B-AS1	105369340	PPP1R14B antisense RNA 1
ENSG00000149735	9.1321	-2.16339	0.345082	-6.2692	3.63e-10	3.22e-09	GPHA2	170589	glycoprotein hormone subunit alpha 2
ENSG00000174276	10.6573	0.847883	0.226336	3.74612	0.000179588	0.000660918	ZNHIT2	741	zinc finger HIT-type containing 2
ENSG00000173825	14.3204	-1.017	0.217553	-4.67472	2.94e-06	1.51e-05	TIGD3	220359	tigger transposable element derived 3
ENSG00000245532	478.757	1.06832	0.133625	7.99487	1.3e-15	2.04e-14	NEAT1	283131	nuclear paraspeckle assembly transcript 1
ENSG00000251562	10015.5	0.958456	0.0839135	11.422	3.25e-30	1.38e-28	MALAT1	378938	metastasis associated lung adenocarcinoma transcript 1
ENSG00000168056	64.757	0.965258	0.138723	6.95819	3.45e-12	3.79e-11	LTBP3	4054	latent transforming growth factor beta binding protein 3
ENSG00000175592	18.7077	1.33658	0.205945	6.48995	8.59e-11	8.2e-10	FOSL1	8061	FOS like 1, AP-1 transcription factor subunit
ENSG00000175573	26.0968	1.17196	0.158261	7.40526	1.31e-13	1.68e-12	C11orf68	83638	chromosome 11 open reading frame 68
ENSG00000175115	48.5238	0.73232	0.111345	6.57704	4.8e-11	4.71e-10	PACS1	55690	phosphofurin acidic cluster sorting protein 1
ENSG00000174791	23.453	0.727676	0.180048	4.04156	5.31e-05	0.000217865	RIN1	9610	Ras and Rab interactor 1
ENSG00000174684	503.62	-1.17625	0.0812643	-14.4744	1.76e-47	2.1e-45	B4GAT1	11041	beta-1,4-glucuronyltransferase 1
ENSG00000255468	5.27705	-1.26007	0.380736	-3.30957	0.000934395	0.00293804	LOC102724064	102724064	uncharacterized LOC102724064
ENSG00000174669	3.18341	-2.34965	0.588053	-3.99564	6.45e-05	0.000259948	SLC29A2	3177	solute carrier family 29 member 2
ENSG00000174547	349.364	-0.776966	0.0661695	-11.742	7.76e-32	3.55e-30	MRPL11	65003	mitochondrial ribosomal protein L11
ENSG00000173933	60.2572	-0.719085	0.11589	-6.20488	5.47e-10	4.73e-09	RBM4	5936	RNA binding motif protein 4
ENSG00000173653	20.8646	-0.782726	0.177868	-4.40059	1.08e-05	5.02e-05	RCE1	9986	Ras converting CAAX endopeptidase 1
ENSG00000172613	19.4144	-0.820098	0.184773	-4.43842	9.06e-06	4.27e-05	RAD9A	5883	RAD9 checkpoint clamp component A
ENSG00000175634	332.831	-0.803157	0.0805076	-9.97616	1.94e-23	5.51e-22	RPS6KB2	6199	ribosomal protein S6 kinase B2
ENSG00000160172	6.81528	-1.16356	0.326775	-3.56073	0.00036982	0.00126832	FAM86C2P	645332	family with sequence similarity 86, member A pseudogene
ENSG00000110721	1303.66	-1.12759	0.129448	-8.71077	3.02e-18	5.88e-17	CHKA	1119	choline kinase alpha
ENSG00000110090	113.684	1.17532	0.0955147	12.3051	8.5e-35	4.58e-33	CPT1A	1374	carnitine palmitoyltransferase 1A
ENSG00000172927	13.8542	4.5634	0.363801	12.5437	4.31e-36	2.53e-34	MYEOV	26579	myeloma overexpressed
ENSG00000162105	33.4076	-0.869081	0.146747	-5.9223	3.17e-09	2.49e-08	SHANK2	22941	SH3 and multiple ankyrin repeat domains 2
ENSG00000172893	214.783	-1.06858	0.136375	-7.8356	4.67e-15	6.93e-14	DHCR7	1717	7-dehydrocholesterol reductase
ENSG00000110200	26.707	-0.999647	0.160982	-6.20967	5.31e-10	4.6e-09	ANAPC15	25906	anaphase promoting complex subunit 15
ENSG00000186642	14.6249	6.23016	0.57928	10.755	5.61e-27	2.01e-25	PDE2A	5138	phosphodiesterase 2A
ENSG00000186635	187.983	-0.801062	0.138882	-5.76791	8.03e-09	5.98e-08	ARAP1	116985	ArfGAP with RhoGAP domain, ankyrin repeat and PH domain 1
ENSG00000214530	60.6764	-0.74036	0.104046	-7.11569	1.11e-12	1.28e-11	STARD10	10809	StAR related lipid transfer domain containing 10
ENSG00000175591	9.99066	0.80604	0.220446	3.6564	0.000255782	0.000908582	P2RY2	5029	purinergic receptor P2Y2
ENSG00000171631	1.74256	-3.66598	0.810957	-4.52056	6.17e-06	3e-05	P2RY6	5031	pyrimidinergic receptor P2Y6
ENSG00000110237	86.7433	-0.985235	0.0924905	-10.6523	1.7e-26	5.92e-25	ARHGEF17	9828	Rho guanine nucleotide exchange factor 17
ENSG00000118363	161.269	-0.804374	0.136272	-5.90273	3.58e-09	2.78e-08	SPCS2	9789	signal peptidase complex subunit 2
ENSG00000158555	98.7269	-1.73456	0.125458	-13.8258	1.78e-43	1.68e-41	GDPD5	81544	glycerophosphodiester phosphodiesterase domain containing 5
ENSG00000255100	8.93018	-2.09936	0.325347	-6.45269	1.1e-10	1.04e-09	LOC101928837	101928837	uncharacterized LOC101928837
ENSG00000149269	14.7559	2.78018	0.230324	12.0707	1.51e-33	7.57e-32	PAK1	5058	p21 (RAC1) activated kinase 1
ENSG00000074201	355.292	-0.736787	0.0858858	-8.57868	9.6e-18	1.8e-16	CLNS1A	1207	chloride nucleotide-sensitive channel 1A
ENSG00000178301	11.2736	-1.15981	0.256851	-4.51551	6.32e-06	3.07e-05	AQP11	282679	aquaporin 11
ENSG00000087884	116.369	0.803183	0.0802439	10.0093	1.39e-23	3.99e-22	AAMDC	28971	adipogenesis associated Mth938 domain containing
ENSG00000149262	24.4098	-0.820314	0.164206	-4.99565	5.86e-07	3.36e-06	INTS4	92105	integrator complex subunit 4
ENSG00000137513	24.231	-1.06433	0.197086	-5.4003	6.65e-08	4.39e-07	NARS2	79731	asparaginyl-tRNA synthetase 2, mitochondrial
ENSG00000171204	44.8689	-1.01489	0.130015	-7.80595	5.91e-15	8.7e-14	TMEM126B	55863	transmembrane protein 126B
ENSG00000137501	47.0999	4.51408	0.37859	11.9234	8.94e-33	4.25e-31	SYTL2	54843	synaptotagmin like 2
ENSG00000150676	1.62711	4.53416	0.69121	6.55975	5.39e-11	5.25e-10	CCDC83	220047	coiled-coil domain containing 83
ENSG00000150687	2.78891	2.33486	0.561033	4.16172	3.16e-05	0.000134679	PRSS23	11098	serine protease 23
ENSG00000174804	254.734	-1.81307	0.070342	-25.7751	1.69e-146	2.48e-143	FZD4	8322	frizzled class receptor 4
ENSG00000166575	89.2375	-1.41453	0.105707	-13.3817	7.74e-41	6.12e-39	TMEM135	65084	transmembrane protein 135
ENSG00000109861	137.941	-0.769417	0.224459	-3.42787	0.000608326	0.00198978	CTSC	1075	cathepsin C
ENSG00000166012	398.661	-0.76557	0.0757123	-10.1116	4.91e-24	1.47e-22	TAF1D	79101	TATA-box binding protein associated factor, RNA polymerase I subunit D
ENSG00000182919	102.311	-0.946212	0.127963	-7.39441	1.42e-13	1.81e-12	C11orf54	28970	chromosome 11 open reading frame 54
ENSG00000166025	6.38071	2.35899	0.532826	4.42732	9.54e-06	4.47e-05	AMOTL1	154810	angiomotin like 1
ENSG00000149218	13.0753	-0.953151	0.278792	-3.41886	0.000628842	0.00205095	ENDOD1	23052	endonuclease domain containing 1
ENSG00000149212	13.7839	2.83935	0.289479	9.80849	1.04e-22	2.85e-21	SESN3	143686	sestrin 3
ENSG00000077458	56.3823	-0.844972	0.120163	-7.03186	2.04e-12	2.3e-11	FAM76B	143684	family with sequence similarity 76 member B
ENSG00000166037	147.106	-0.806973	0.0753425	-10.7107	9.06e-27	3.23e-25	CEP57	9702	centrosomal protein 57
ENSG00000110318	8.60577	-1.18213	0.288876	-4.09216	4.27e-05	0.000178193	CEP126	57562	centrosomal protein 126
ENSG00000152558	562.338	-0.738917	0.172059	-4.29456	1.75e-05	7.82e-05	TMEM123	114908	transmembrane protein 123
ENSG00000137760	19.8378	-0.95691	0.189045	-5.06182	4.15e-07	2.43e-06	ALKBH8	91801	alkB homolog 8, tRNA methyltransferase
ENSG00000075239	254.113	-1.03247	0.142232	-7.25906	3.9e-13	4.72e-12	ACAT1	38	acetyl-CoA acetyltransferase 1
ENSG00000178202	74.0496	-0.75967	0.112681	-6.74175	1.56e-11	1.61e-10	POGLUT3	143888	protein O-glucosyltransferase 3
ENSG00000204381	4.52224	5.12139	0.8418	6.08386	1.17e-09	9.76e-09	LAYN	143903	layilin
ENSG00000086848	22.646	-0.851746	0.179155	-4.75425	1.99e-06	1.05e-05	ALG9	79796	ALG9 alpha-1,2-mannosyltransferase
ENSG00000109846	2.8963	2.42545	0.489577	4.95419	7.26e-07	4.11e-06	CRYAB	1410	crystallin alpha B
ENSG00000150768	163.04	-1.19894	0.0799221	-15.0013	7.19e-51	1.01e-48	DLAT	1737	dihydrolipoamide S-acetyltransferase
ENSG00000204370	17.9226	-1.14431	0.207856	-5.50531	3.69e-08	2.52e-07	SDHD	6392	succinate dehydrogenase complex subunit D
ENSG00000150782	11.7707	1.81136	0.267986	6.75914	1.39e-11	1.44e-10	IL18	3606	interleukin 18
ENSG00000166682	3.72854	1.37204	0.382029	3.59145	0.000328844	0.00114085	TMPRSS5	80975	transmembrane serine protease 5
ENSG00000137656	68.5847	-1.08169	0.14077	-7.68407	1.54e-14	2.18e-13	BUD13	84811	BUD13 homolog
ENSG00000110243	188.895	-2.01317	0.130532	-15.4228	1.15e-53	1.84e-51	APOA5	116519	apolipoprotein A5
ENSG00000110245	140.953	-1.45594	0.193038	-7.54224	4.62e-14	6.24e-13	APOC3	345	apolipoprotein C3
ENSG00000118137	737.16	-1.12074	0.0997437	-11.2362	2.71e-29	1.1e-27	APOA1	335	apolipoprotein A1
ENSG00000160584	26.633	-0.937086	0.155502	-6.02622	1.68e-09	1.37e-08	SIK3	23387	SIK family kinase 3
ENSG00000160588	38.6243	1.14177	0.12163	9.38727	6.16e-21	1.45e-19	MPZL3	196264	myelin protein zero like 3
ENSG00000149573	227.248	1.04359	0.0764187	13.6562	1.85e-42	1.64e-40	MPZL2	10205	myelin protein zero like 2
ENSG00000167286	11.3112	3.96145	0.33459	11.8397	2.43e-32	1.14e-30	CD3D	915	CD3d molecule
ENSG00000160654	1.53219	3.68259	0.662149	5.56157	2.67e-08	1.87e-07	CD3G	917	CD3g molecule
ENSG00000109929	81.0839	-0.783855	0.0973075	-8.05544	7.92e-16	1.26e-14	SC5D	6309	sterol-C5-desaturase
ENSG00000137642	227.823	-0.786608	0.11263	-6.98403	2.87e-12	3.18e-11	SORL1	6653	sortilin related receptor 1
ENSG00000154127	80.9258	1.46625	0.15026	9.75804	1.7e-22	4.59e-21	UBASH3B	84959	ubiquitin associated and SH3 domain containing B
ENSG00000110002	5.15582	3.33353	0.438031	7.61027	2.74e-14	3.78e-13	VWA5A	4013	von Willebrand factor A domain containing 5A
ENSG00000019102	14.8376	2.50747	0.249209	10.0617	8.16e-24	2.4e-22	VSIG2	23584	V-set and immunoglobulin domain containing 2
ENSG00000149564	44.1371	3.35563	0.174052	19.2794	8e-83	4.2e-80	ESAM	90952	endothelial cell adhesion molecule
ENSG00000154133	11.87	2.23085	0.265965	8.38775	4.96e-17	8.73e-16	ROBO4	54538	roundabout guidance receptor 4
ENSG00000149554	134.256	-0.759666	0.0782971	-9.70236	2.95e-22	7.79e-21	CHEK1	1111	checkpoint kinase 1
ENSG00000198331	7.00207	-1.09748	0.320226	-3.4272	0.000609835	0.00199427	HYLS1	219844	HYLS1 centriolar and ciliogenesis associated
ENSG00000134954	3.39311	3.81175	0.629819	6.05214	1.43e-09	1.17e-08	ETS1	2113	ETS proto-oncogene 1, transcription factor
ENSG00000166086	7.01971	-3.9972	0.618834	-6.45924	1.05e-10	9.95e-10	JAM3	83700	junctional adhesion molecule 3
ENSG00000151503	40.3174	-0.862917	0.130093	-6.63306	3.29e-11	3.28e-10	NCAPD3	23310	non-SMC condensin II complex subunit D3
ENSG00000139044	3.53308	-3.24793	0.70129	-4.63137	3.63e-06	1.84e-05	B4GALNT3	283358	beta-1,4-N-acetyl-galactosaminyltransferase 3
ENSG00000151062	114.865	2.06144	0.107101	19.2476	1.48e-82	7.5e-80	CACNA2D4	93589	calcium voltage-gated channel auxiliary subunit alpha2delta 4
ENSG00000166159	2.10951	3.02439	0.607253	4.98045	6.34e-07	3.62e-06	LRTM2	654429	leucine rich repeats and transmembrane domains 2
ENSG00000118971	73.0683	4.45213	0.338805	13.1407	1.92e-39	1.41e-37	CCND2	894	cyclin D2
ENSG00000010278	38.9024	1.86749	0.383053	4.87528	1.09e-06	5.96e-06	CD9	928	CD9 molecule
ENSG00000159335	301.752	-0.877723	0.0974009	-9.01145	2.03e-19	4.28e-18	PTMS	5763	parathymosin
ENSG00000111671	9.264	0.91049	0.243048	3.74613	0.000179581	0.000660918	SPSB2	84727	splA/ryanodine receptor domain and SOCS box containing 2
ENSG00000111674	50.4283	0.703634	0.114772	6.13072	8.75e-10	7.41e-09	ENO2	2026	enolase 2
ENSG00000177675	2.02964	2.18902	0.539262	4.05929	4.92e-05	0.00020299	CD163L1	283316	CD163 molecule like 1
ENSG00000059804	1500.24	-1.09924	0.072947	-15.069	2.59e-51	3.73e-49	SLC2A3	6515	solute carrier family 2 member 3
ENSG00000175899	824.45	0.761066	0.0941375	8.08462	6.24e-16	1e-14	A2M	2	alpha-2-macroglobulin
ENSG00000139112	97.4164	1.49475	0.101138	14.7794	1.99e-49	2.55e-47	GABARAPL1	23710	GABA type A receptor associated protein like 1
ENSG00000139083	22.0102	1.77867	0.186603	9.53184	1.55e-21	3.81e-20	ETV6	2120	ETS variant transcription factor 6
ENSG00000111261	4.2395	1.53328	0.36112	4.24591	2.18e-05	9.56e-05	MANSC1	54682	MANSC domain containing 1
ENSG00000013588	22.595	4.75061	0.311654	15.2432	1.83e-52	2.74e-50	GPRC5A	9052	G protein-coupled receptor class C group 5 member A
ENSG00000084444	4.86158	-3.23841	0.602324	-5.37653	7.59e-08	4.97e-07	FAM234B	57613	family with sequence similarity 234 member B
ENSG00000111339	16.7309	-0.921054	0.206334	-4.4639	8.05e-06	3.84e-05	ART4	420	ADP-ribosyltransferase 4 (Dombrock blood group)
ENSG00000139055	4.7749	2.997	0.416403	7.19737	6.14e-13	7.28e-12	ERP27	121506	endoplasmic reticulum protein 27
ENSG00000023697	31.321	-0.746097	0.173099	-4.31024	1.63e-05	7.34e-05	DERA	51071	deoxyribose-phosphate aldolase
ENSG00000008394	292.942	-1.61263	0.217094	-7.42826	1.1e-13	1.42e-12	MGST1	4257	microsomal glutathione S-transferase 1
ENSG00000111731	13.2754	-1.23978	0.241679	-5.12987	2.9e-07	1.74e-06	C2CD5	9847	C2 calcium dependent domain containing 5
ENSG00000123095	1.2378	3.59153	0.758564	4.73465	2.19e-06	1.15e-05	BHLHE41	79365	basic helix-loop-helix family member e41
ENSG00000110888	80.6359	1.24487	0.0892254	13.9519	3.06e-44	3e-42	CAPRIN2	65981	caprin family member 2
ENSG00000151229	8.96539	-1.41689	0.291646	-4.85825	1.18e-06	6.47e-06	SLC2A13	114134	solute carrier family 2 member 13
ENSG00000198001	23.0608	0.798121	0.159035	5.01852	5.21e-07	3.01e-06	IRAK4	51135	interleukin 1 receptor associated kinase 4
ENSG00000134294	735.815	0.82464	0.067248	12.2627	1.44e-34	7.63e-33	SLC38A2	54407	solute carrier family 38 member 2
ENSG00000211584	41.2899	0.995265	0.154883	6.42592	1.31e-10	1.23e-09	SLC48A1	55652	solute carrier family 48 member 1
ENSG00000061273	324.422	1.04854	0.105106	9.97599	1.94e-23	5.51e-22	HDAC7	51564	histone deacetylase 7
ENSG00000111424	6.52172	1.86107	0.291201	6.39102	1.65e-10	1.52e-09	VDR	7421	vitamin D receptor
ENSG00000139620	20.4257	-0.844359	0.207254	-4.07402	4.62e-05	0.000191672	KANSL2	54934	KAT8 regulatory NSL complex subunit 2
ENSG00000167552	40.2206	1.48417	0.399494	3.71513	0.000203103	0.000737489	TUBA1A	7846	tubulin alpha 1a
ENSG00000135451	21.6638	-0.878844	0.184062	-4.7747	1.8e-06	9.57e-06	TROAP	10024	trophinin associated protein
ENSG00000161791	4.81187	2.19988	0.392983	5.5979	2.17e-08	1.54e-07	FMNL3	91010	formin like 3
ENSG00000178449	187.218	0.718101	0.0777865	9.2317	2.66e-20	6e-19	COX14	84987	cytochrome c oxidase assembly factor COX14
ENSG00000185432	289.884	-1.74465	0.100757	-17.3154	3.6e-67	1.06e-64	METTL7A	25840	methyltransferase like 7A
ENSG00000161835	23.4364	-0.757619	0.176691	-4.28783	1.8e-05	8.04e-05	GRASP	160622	general receptor for phosphoinositides 1 associated scaffold protein
ENSG00000167767	8.97959	3.64221	0.375402	9.70216	2.95e-22	7.79e-21	KRT80	144501	keratin 80
ENSG00000170421	490.37	0.717584	0.0767635	9.34799	8.93e-21	2.09e-19	KRT8	3856	keratin 8
ENSG00000111057	2202.38	1.04636	0.0844845	12.3852	3.14e-35	1.72e-33	KRT18	3875	keratin 18
ENSG00000167779	10.0964	2.9191	0.301199	9.69162	3.27e-22	8.55e-21	IGFBP6	3489	insulin like growth factor binding protein 6
ENSG00000172819	4.73952	1.26658	0.342572	3.69727	0.000217927	0.000785882	RARG	5916	retinoic acid receptor gamma
ENSG00000012822	4.90842	1.33579	0.325778	4.10032	4.13e-05	0.000172544	CALCOCO1	57658	calcium binding and coiled-coil domain 1
ENSG00000250742	16.8476	-4.69445	0.50474	-9.30073	1.39e-20	3.21e-19	LINC02381	400043	long intergenic non-protein coding RNA 2381
ENSG00000094916	226.927	0.841835	0.106702	7.88963	3.03e-15	4.59e-14	CBX5	23468	chromobox 5
ENSG00000123405	9.10901	2.24051	0.28592	7.83615	4.65e-15	6.91e-14	NFE2	4778	nuclear factor, erythroid 2
ENSG00000135447	5.18556	-3.82682	0.694214	-5.51245	3.54e-08	2.43e-07	PPP1R1A	5502	protein phosphatase 1 regulatory inhibitor subunit 1A
ENSG00000123353	84.0588	0.842114	0.0917393	9.17942	4.33e-20	9.53e-19	ORMDL2	29095	ORMDL sphingolipid biosynthesis regulator 2
ENSG00000182796	3.13781	1.34782	0.401244	3.35911	0.000781944	0.00249388	TMEM198B	440104	transmembrane protein 198B (pseudogene)
ENSG00000065357	3.76711	2.55633	0.487543	5.24329	1.58e-07	9.9e-07	DGKA	1606	diacylglycerol kinase alpha
ENSG00000076067	9.83808	1.4202	0.257327	5.51904	3.41e-08	2.35e-07	RBMS2	5939	RNA binding motif single stranded interacting protein 2
ENSG00000166888	103.153	0.945845	0.111822	8.45845	2.71e-17	4.84e-16	STAT6	6778	signal transducer and activator of transcription 6
ENSG00000182199	286.647	-0.873958	0.0926987	-9.42795	4.18e-21	1e-19	SHMT2	6472	serine hydroxymethyltransferase 2
ENSG00000139269	20.2551	-1.6185	0.218622	-7.40319	1.33e-13	1.7e-12	INHBE	83729	inhibin subunit beta E
ENSG00000178498	11.1853	-1.03773	0.258858	-4.0089	6.1e-05	0.000247681	DTX3	196403	deltex E3 ubiquitin ligase 3
ENSG00000240771	69.7006	-0.753712	0.133763	-5.6347	1.75e-08	1.25e-07	ARHGEF25	115557	Rho guanine nucleotide exchange factor 25
ENSG00000111110	22.1935	-2.30774	0.239433	-9.63836	5.51e-22	1.41e-20	PPM1H	57460	protein phosphatase, Mg2+/Mn2+ dependent 1H
ENSG00000153179	69.29	-1.54826	0.266002	-5.82049	5.87e-09	4.44e-08	RASSF3	283349	Ras association domain family member 3
ENSG00000174099	26.7504	5.50288	0.33694	16.3319	5.85e-60	1.28e-57	MSRB3	253827	methionine sulfoxide reductase B3
ENSG00000135643	4.92789	3.28306	0.440586	7.45158	9.22e-14	1.21e-12	KCNMB4	27345	potassium calcium-activated channel subfamily M regulatory beta subunit 4
ENSG00000127324	7.26041	1.31036	0.272851	4.80249	1.57e-06	8.44e-06	TSPAN8	7103	tetraspanin 8
ENSG00000139278	12.9659	1.98634	0.212755	9.3363	9.98e-21	2.32e-19	GLIPR1	11010	GLI pathogenesis related 1
ENSG00000139289	1120.97	1.16832	0.084975	13.749	5.17e-43	4.78e-41	PHLDA1	22822	pleckstrin homology like domain family A member 1
ENSG00000111052	49.1799	-0.878232	0.119476	-7.35071	1.97e-13	2.47e-12	LIN7A	8825	lin-7 homolog A, crumbs cell polarity complex component
ENSG00000127720	7.65326	-1.56079	0.319647	-4.88284	1.05e-06	5.76e-06	METTL25	84190	methyltransferase like 25
ENSG00000049130	58.0762	2.24018	0.13989	16.0139	1.02e-57	2e-55	KITLG	4254	KIT ligand
ENSG00000139318	439.438	1.7726	0.14141	12.5352	4.79e-36	2.8e-34	DUSP6	1848	dual specificity phosphatase 6
ENSG00000070961	188.593	-0.82522	0.0671793	-12.2838	1.11e-34	5.94e-33	ATP2B1	490	ATPase plasma membrane Ca2+ transporting 1
ENSG00000173598	119.225	1.60194	0.134534	11.9073	1.08e-32	5.13e-31	NUDT4	11163	nudix hydrolase 4
ENSG00000246985	2.31671	1.96539	0.538825	3.64755	0.000264755	0.000935934	SOCS2-AS1	144481	SOCS2 antisense RNA 1
ENSG00000120833	6.39063	1.33376	0.295241	4.51752	6.26e-06	3.04e-05	SOCS2	8835	suppressor of cytokine signaling 2
ENSG00000139343	879.254	-0.87572	0.127167	-6.88636	5.72e-12	6.17e-11	SNRPF	6636	small nuclear ribonucleoprotein polypeptide F
ENSG00000139344	16.0906	-0.793275	0.228702	-3.4686	0.00052318	0.00173599	AMDHD1	144193	amidohydrolase domain containing 1
ENSG00000084110	4.37367	-2.34174	0.615973	-3.80169	0.00014371	0.000537625	HAL	3034	histidine ammonia-lyase
ENSG00000111145	43.8554	2.07818	0.198531	10.4678	1.21e-25	4.03e-24	ELK3	2004	ETS transcription factor ELK3
ENSG00000012504	86.7696	-2.1511	0.140062	-15.3582	3.12e-53	4.88e-51	NR1H4	9971	nuclear receptor subfamily 1 group H member 4
ENSG00000111666	292.261	-0.819906	0.0980085	-8.36567	5.98e-17	1.05e-15	CHPT1	56994	choline phosphotransferase 1
ENSG00000111727	10.1606	-0.998954	0.258541	-3.86381	0.000111632	0.000427403	HCFC2	29915	host cell factor C2
ENSG00000235162	326.413	1.42716	0.0791335	18.0348	1.04e-72	3.47e-70	C12orf75	387882	chromosome 12 open reading frame 75
ENSG00000074590	44.1737	1.26445	0.168438	7.50691	6.05e-14	8.12e-13	NUAK1	9891	NUAK family kinase 1
ENSG00000166046	6.3682	2.15224	0.315901	6.81302	9.56e-12	1.01e-10	TCP11L2	255394	t-complex 11 like 2
ENSG00000139428	126.098	-1.1779	0.0968446	-12.1628	4.9e-34	2.53e-32	MMAB	326625	metabolism of cobalamin associated B
ENSG00000110921	261.819	-0.986385	0.123755	-7.97046	1.58e-15	2.46e-14	MVK	4598	mevalonate kinase
ENSG00000111199	13.8163	1.24327	0.220278	5.64411	1.66e-08	1.19e-07	TRPV4	59341	transient receptor potential cation channel subfamily V member 4
ENSG00000089127	4.46417	2.25472	0.383198	5.88395	4.01e-09	3.1e-08	OAS1	4938	2'-5'-oligoadenylate synthetase 1
ENSG00000139410	7.83005	1.53131	0.284543	5.38166	7.38e-08	4.84e-07	SDSL	113675	serine dehydratase like
ENSG00000135111	370.728	1.16583	0.09684	12.0388	2.22e-33	1.11e-31	TBX3	6926	T-box transcription factor 3
ENSG00000088992	75.6524	0.812421	0.105626	7.69148	1.45e-14	2.07e-13	TESC	54997	tescalcin
ENSG00000089159	153.803	0.80316	0.0787789	10.1951	2.08e-24	6.44e-23	PXN	5829	paxillin
ENSG00000150977	41.3761	-0.730502	0.153018	-4.77397	1.81e-06	9.6e-06	RILPL2	196383	Rab interacting lysosomal protein like 2
ENSG00000119242	56.8374	0.831807	0.106917	7.77993	7.26e-15	1.06e-13	CCDC92	80212	coiled-coil domain containing 92
ENSG00000177169	62.3901	0.875546	0.127676	6.85754	7.01e-12	7.45e-11	ULK1	8408	unc-51 like autophagy activating kinase 1
ENSG00000102678	3.58838	4.75375	0.675583	7.03652	1.97e-12	2.23e-11	FGF9	2254	fibroblast growth factor 9
ENSG00000102781	30.6657	0.838844	0.134194	6.251	4.08e-10	3.59e-09	KATNAL1	84056	katanin catalytic subunit A1 like 1
ENSG00000172915	8.08618	-2.69933	0.409949	-6.58454	4.56e-11	4.49e-10	NBEA	26960	neurobeachin
ENSG00000133104	21.4121	1.28278	0.160708	7.98208	1.44e-15	2.25e-14	SPART	23111	spartin
ENSG00000179630	8.32247	0.905982	0.260121	3.48293	0.000495966	0.00165427	LACC1	144811	laccase domain containing 1
ENSG00000237361	5.1271	1.159	0.340439	3.40443	0.000663024	0.00214956	TUSC8	400128	tumor suppressor candidate 8
ENSG00000102804	80.4587	1.96698	0.15647	12.571	3.05e-36	1.82e-34	TSC22D1	8848	TSC22 domain family member 1
ENSG00000136141	29.0634	1.02215	0.191081	5.34928	8.83e-08	5.72e-07	LRCH1	23143	leucine rich repeats and calponin homology domain containing 1
ENSG00000136143	17.5157	-0.95848	0.191626	-5.00182	5.68e-07	3.26e-06	SUCLA2	8803	succinate-CoA ligase ADP-forming beta subunit
ENSG00000136159	69.8329	-0.849473	0.126479	-6.71632	1.86e-11	1.9e-10	NUDT15	55270	nudix hydrolase 15
ENSG00000102547	16.0925	1.68625	0.192199	8.77344	1.73e-18	3.41e-17	CAB39L	81617	calcium binding protein 39 like
ENSG00000231607	18.2133	-0.727028	0.215014	-3.3813	0.000721425	0.002321	DLEU2	8847	deleted in lymphocytic leukemia 2
ENSG00000139668	65.6435	0.767457	0.0947241	8.10202	5.41e-16	8.75e-15	WDFY2	115825	WD repeat and FYVE domain containing 2
ENSG00000123191	43.4776	-1.27224	0.162186	-7.84431	4.35e-15	6.5e-14	ATP7B	540	ATPase copper transporting beta
ENSG00000136098	59.4961	0.746828	0.108482	6.88437	5.8e-12	6.24e-11	NEK3	4752	NIMA related kinase 3
ENSG00000102554	8.72204	1.63847	0.261146	6.27415	3.52e-10	3.12e-09	KLF5	688	Kruppel like factor 5
ENSG00000136111	136.803	-0.70873	0.0913929	-7.75477	8.85e-15	1.28e-13	TBC1D4	9882	TBC1 domain family member 4
ENSG00000152192	20.0528	0.97264	0.179577	5.41627	6.09e-08	4.03e-07	POU4F1	5457	POU class 4 homeobox 1
ENSG00000125257	32.6548	-1.52112	0.164939	-9.22229	2.91e-20	6.52e-19	ABCC4	10257	ATP binding cassette subfamily C member 4
ENSG00000134874	88.7966	-1.32828	0.107492	-12.357	4.47e-35	2.44e-33	DZIP1	22873	DAZ interacting zinc finger protein 1
ENSG00000139793	51.2351	0.847591	0.132395	6.40199	1.53e-10	1.42e-09	MBNL2	10150	muscleblind like splicing regulator 2
ENSG00000125246	40.5281	-0.931541	0.138491	-6.72636	1.74e-11	1.78e-10	CLYBL	171425	citrate lyase beta like
ENSG00000043355	17.051	0.883205	0.259455	3.40408	0.000663874	0.00215185	ZIC2	7546	Zic family member 2
ENSG00000057593	15.3403	-0.889655	0.213422	-4.16853	3.07e-05	0.000130982	F7	2155	coagulation factor VII
ENSG00000126231	6.58122	-1.67601	0.388888	-4.30975	1.63e-05	7.35e-05	PROZ	8858	protein Z, vitamin K dependent plasma glycoprotein
ENSG00000198176	277.251	-0.765614	0.0886355	-8.63778	5.73e-18	1.09e-16	TFDP1	7027	transcription factor Dp-1
ENSG00000185989	1.88543	4.49048	0.683746	6.56747	5.12e-11	5.01e-10	RASA3	22821	RAS p21 protein activator 3
ENSG00000136319	64.3899	-0.739387	0.128491	-5.75438	8.7e-09	6.44e-08	TTC5	91875	tetratricopeptide repeat domain 5
ENSG00000129566	15.1317	1.58723	0.208737	7.60395	2.87e-14	3.96e-13	TEP1	7011	telomerase associated protein 1
ENSG00000165795	151.504	-1.45773	0.102092	-14.2786	2.98e-46	3.19e-44	NDRG2	57447	NDRG family member 2
ENSG00000165801	109.587	-1.39976	0.108597	-12.8895	5.16e-38	3.5e-36	ARHGEF40	55701	Rho guanine nucleotide exchange factor 40
ENSG00000157227	57.5777	1.68543	0.152161	11.0766	1.63e-28	6.27e-27	MMP14	4323	matrix metallopeptidase 14
ENSG00000197324	67.5316	0.958675	0.0971497	9.86802	5.73e-23	1.6e-21	LRP10	26020	LDL receptor related protein 10
ENSG00000136367	6.84276	1.20789	0.294649	4.09941	4.14e-05	0.000173097	ZFHX2	85446	zinc finger homeobox 2
ENSG00000100867	26751.4	-0.72806	0.0669863	-10.8688	1.62e-27	6.04e-26	DHRS2	10202	dehydrogenase/reductase 2
ENSG00000100889	165.639	-0.765867	0.0762347	-10.0462	9.55e-24	2.78e-22	PCK2	5106	phosphoenolpyruvate carboxykinase 2, mitochondrial
ENSG00000213903	29.5315	0.956417	0.152093	6.28838	3.21e-10	2.86e-09	LTB4R	1241	leukotriene B4 receptor
ENSG00000100968	1.23626	3.33665	0.710378	4.697	2.64e-06	1.37e-05	NFATC4	4776	nuclear factor of activated T cells 4
ENSG00000100441	150.938	0.775224	0.087001	8.91052	5.08e-19	1.04e-17	KHNYN	23351	KH and NYN domain containing
ENSG00000100478	11.4548	-2.01249	0.297159	-6.77241	1.27e-11	1.32e-10	AP4S1	11154	adaptor related protein complex 4 subunit sigma 1
ENSG00000258474	3.65766	3.71451	0.571594	6.49852	8.11e-11	7.77e-10	LINC02313	105370439	long intergenic non-protein coding RNA 2313
ENSG00000100852	449.753	0.891984	0.0637593	13.9899	1.8e-44	1.84e-42	ARHGAP5	394	Rho GTPase activating protein 5
ENSG00000151320	3.12662	2.53668	0.471993	5.37441	7.68e-08	5.02e-07	AKAP6	9472	A-kinase anchoring protein 6
ENSG00000129521	8.10188	-2.29971	0.385043	-5.9726	2.33e-09	1.87e-08	EGLN3	112399	egl-9 family hypoxia inducible factor 3
ENSG00000258738	62.8624	0.740001	0.102038	7.25223	4.1e-13	4.95e-12	LOC112268124	112268124	uncharacterized LOC112268124
ENSG00000129514	70.129	-1.10465	0.153504	-7.19626	6.19e-13	7.33e-12	FOXA1	3169	forkhead box A1
ENSG00000139865	33.0131	-1.23205	0.171987	-7.16365	7.86e-13	9.19e-12	TTC6	319089	tetratricopeptide repeat domain 6
ENSG00000092208	84.4149	-1.15111	0.183092	-6.28706	3.24e-10	2.88e-09	GEMIN2	8487	gem nuclear organelle associated protein 2
ENSG00000100442	299.199	-0.915184	0.0731033	-12.519	5.87e-36	3.4e-34	FKBP3	2287	FKBP prolyl isomerase 3
ENSG00000100479	14.5086	-1.03212	0.215429	-4.79102	1.66e-06	8.89e-06	POLE2	5427	DNA polymerase epsilon 2, accessory subunit
ENSG00000100504	149.294	-0.726863	0.092013	-7.89956	2.8e-15	4.25e-14	PYGL	5836	glycogen phosphorylase L
ENSG00000139926	3.31692	2.80289	0.483146	5.80133	6.58e-09	4.95e-08	FRMD6	122786	FERM domain containing 6
ENSG00000073712	161.489	-1.73541	0.0988266	-17.5601	4.98e-69	1.52e-66	FERMT2	10979	fermitin family member 2
ENSG00000125378	312.312	1.13391	0.220741	5.13683	2.79e-07	1.68e-06	BMP4	652	bone morphogenetic protein 4
ENSG00000131981	40.7339	0.911274	0.167782	5.43129	5.59e-08	3.72e-07	LGALS3	3958	galectin 3
ENSG00000258791	3.14229	5.26079	0.847778	6.20539	5.46e-10	4.72e-09	LINC00520	645687	long intergenic non-protein coding RNA 520
ENSG00000100557	1.14015	3.75618	0.708429	5.30213	1.14e-07	7.3e-07	CCDC198	55195	coiled-coil domain containing 198
ENSG00000139970	1.91347	4.52743	0.68211	6.63739	3.19e-11	3.2e-10	RTN1	6252	reticulon 1
ENSG00000126778	85.4569	1.17541	0.0910263	12.9129	3.81e-38	2.6e-36	SIX1	6495	SIX homeobox 1
ENSG00000054654	108.319	1.51712	0.116759	12.9937	1.33e-38	9.13e-37	SYNE2	23224	spectrin repeat containing nuclear envelope protein 2
ENSG00000126822	50.4496	-1.44752	0.133972	-10.8047	3.27e-27	1.19e-25	PLEKHG3	26030	pleckstrin homology and RhoGEF domain containing G3
ENSG00000258289	20.8956	0.802463	0.156771	5.11871	3.08e-07	1.84e-06	CHURC1	91612	churchill domain containing 1
ENSG00000139998	31.0507	-1.22915	0.165376	-7.43241	1.07e-13	1.38e-12	RAB15	376267	RAB15, member RAS oncogene family
ENSG00000033170	25.2416	1.29448	0.173892	7.44417	9.76e-14	1.27e-12	FUT8	2530	fucosyltransferase 8
ENSG00000081181	41.4045	1.73498	0.17259	10.0526	8.95e-24	2.62e-22	ARG2	384	arginase 2
ENSG00000072042	195.045	-1.58651	0.107996	-14.6904	7.42e-49	9.17e-47	RDH11	51109	retinol dehydrogenase 11
ENSG00000185650	440.507	1.01106	0.0753446	13.4191	4.67e-41	3.8e-39	ZFP36L1	677	ZFP36 ring finger protein like 1
ENSG00000133985	16.7094	5.01638	0.373315	13.4374	3.65e-41	3e-39	TTC9	23508	tetratricopeptide repeat domain 9
ENSG00000259153	8.26626	1.41943	0.294683	4.8168	1.46e-06	7.88e-06	LOC100506411	100506411	uncharacterized LOC100506411
ENSG00000205683	1.33353	-3.66879	0.851086	-4.31071	1.63e-05	7.33e-05	DPF3	8110	double PHD fingers 3
ENSG00000165861	38.0572	1.27957	0.140097	9.13346	6.63e-20	1.43e-18	ZFYVE1	53349	zinc finger FYVE-type containing 1
ENSG00000119673	236.558	-1.16892	0.0923422	-12.6586	1e-36	6.29e-35	ACOT2	10965	acyl-CoA thioesterase 2
ENSG00000176903	9.8852	-1.75074	0.313477	-5.58489	2.34e-08	1.65e-07	PNMA1	9240	PNMA family member 1
ENSG00000156030	33.2269	-0.732641	0.136541	-5.36573	8.06e-08	5.25e-07	ELMSAN1	91748	ELM2 and Myb/SANT domain containing 1
ENSG00000119711	72.6427	-1.46002	0.108907	-13.4062	5.56e-41	4.47e-39	ALDH6A1	4329	aldehyde dehydrogenase 6 family member A1
ENSG00000205659	37.8349	-0.763952	0.146646	-5.20951	1.89e-07	1.17e-06	LIN52	91750	lin-52 DREAM MuvB core complex component
ENSG00000119681	3.62726	1.84121	0.427725	4.30465	1.67e-05	7.51e-05	LTBP2	4053	latent transforming growth factor beta binding protein 2
ENSG00000119703	6.55268	1.4539	0.295667	4.91736	8.77e-07	4.89e-06	ZC2HC1C	79696	zinc finger C2HC-type containing 1C
ENSG00000119638	69.8425	0.702718	0.0937086	7.49897	6.43e-14	8.59e-13	NEK9	91754	NIMA related kinase 9
ENSG00000140044	56.8002	-0.967392	0.121831	-7.94046	2.01e-15	3.09e-14	JDP2	122953	Jun dimerization protein 2
ENSG00000156127	3.81056	3.4689	0.514982	6.73596	1.63e-11	1.67e-10	BATF	10538	basic leucine zipper ATF-like transcription factor
ENSG00000071246	2.31157	1.82704	0.504553	3.6211	0.000293348	0.00102836	VASH1	22846	vasohibin 1
ENSG00000151445	18.6168	0.927261	0.184133	5.03582	4.76e-07	2.77e-06	VIPAS39	63894	VPS33B interacting protein, apical-basolateral polarity regulator, spe-39 homolog
ENSG00000100593	25.1001	-1.19698	0.173114	-6.91442	4.7e-12	5.12e-11	ISM2	145501	isthmin 2
ENSG00000100628	5.9515	1.78497	0.317769	5.6172	1.94e-08	1.38e-07	ASB2	51676	ankyrin repeat and SOCS box containing 2
ENSG00000089723	21.1415	0.895238	0.192941	4.63995	3.48e-06	1.77e-05	OTUB2	78990	OTU deubiquitinase, ubiquitin aldehyde binding 2
ENSG00000165948	28.1449	0.969378	0.141236	6.86353	6.72e-12	7.16e-11	IFI27L1	122509	interferon alpha inducible protein 27 like 1
ENSG00000119632	3.24156	1.75139	0.515252	3.3991	0.00067608	0.00218611	IFI27L2	83982	interferon alpha inducible protein 27 like 2
ENSG00000165959	18.7988	0.78105	0.214309	3.64451	0.000267903	0.000946607	CLMN	79789	calmin
ENSG00000176438	4.51588	-1.59847	0.429494	-3.72175	0.000197848	0.000720188	SYNE3	161176	spectrin repeat containing nuclear envelope family member 3
ENSG00000196405	38.4367	-0.987581	0.140924	-7.00792	2.42e-12	2.71e-11	EVL	51466	Enah/Vasp-like
ENSG00000100811	213.382	-2.43056	0.0863229	-28.1567	1.99e-174	4.87e-171	YY1	7528	YY1 transcription factor
ENSG00000197119	49.0583	1.27999	0.141009	9.07736	1.11e-19	2.36e-18	SLC25A29	123096	solute carrier family 25 member 29
ENSG00000185559	578.57	-1.51399	0.111813	-13.5404	9.03e-42	7.63e-40	DLK1	8788	delta like non-canonical Notch ligand 1
ENSG00000259230	9.86482	0.849184	0.254313	3.33914	0.000840396	0.00266642	LINC02323	105370681	long intergenic non-protein coding RNA 2323
ENSG00000166126	18.9598	-1.40121	0.216543	-6.47082	9.75e-11	9.25e-10	AMN	81693	amnion associated transmembrane protein
ENSG00000166165	232.317	-0.980264	0.102525	-9.56126	1.16e-21	2.92e-20	CKB	1152	creatine kinase B
ENSG00000256053	62.3161	0.707399	0.106093	6.66773	2.6e-11	2.63e-10	COA8	84334	cytochrome c oxidase assembly factor 8
ENSG00000185567	1.2613	3.35717	0.68775	4.88139	1.05e-06	5.8e-06	AHNAK2	113146	AHNAK nucleoprotein 2
ENSG00000251602	10.9125	-0.856907	0.250845	-3.41608	0.000635304	0.00207065	LOC100507437	100507437	uncharacterized LOC100507437
ENSG00000182809	56.2575	1.18903	0.126013	9.43579	3.88e-21	9.31e-20	CRIP2	1397	cysteine rich protein 2
ENSG00000206190	1.22881	3.07512	0.685207	4.48787	7.19e-06	3.46e-05	ATP10A	57194	ATPase phospholipid transporting 10A (putative)
ENSG00000104081	23.0764	1.68555	0.189249	8.90655	5.26e-19	1.07e-17	BMF	90427	Bcl2 modifying factor
ENSG00000259330	3.62253	-1.60382	0.47296	-3.39102	0.00069634	0.00224816	INAFM2	100505573	InaF motif containing 2
ENSG00000188549	4.00744	2.21665	0.402008	5.51395	3.51e-08	2.41e-07	CCDC9B	388115	coiled-coil domain containing 9B
ENSG00000169105	45.0013	-1.09614	0.188347	-5.81976	5.89e-09	4.46e-08	CHST14	113189	carbohydrate sulfotransferase 14
ENSG00000137812	63.4371	-0.727292	0.137911	-5.27363	1.34e-07	8.45e-07	KNL1	57082	kinetochore scaffold 1
ENSG00000166145	4.40288	3.55964	0.477472	7.45518	8.97e-14	1.18e-12	SPINT1	6692	serine peptidase inhibitor, Kunitz type 1
ENSG00000247556	359.079	-0.774764	0.0722513	-10.7232	7.92e-27	2.84e-25	OIP5-AS1	729082	OIP5 antisense RNA 1
ENSG00000166946	27.7006	0.766688	0.200978	3.81479	0.000136298	0.000511458	CCNDBP1	23582	cyclin D1 binding protein 1
ENSG00000171877	11.6293	4.55257	0.383379	11.8749	1.6e-32	7.51e-31	FRMD5	84978	FERM domain containing 5
ENSG00000185880	8.5595	0.933676	0.259721	3.59491	0.000324502	0.00112683	TRIM69	140691	tripartite motif containing 69
ENSG00000138606	35.2539	-0.980641	0.192276	-5.10016	3.39e-07	2.01e-06	SHF	90525	Src homology 2 domain containing F
ENSG00000171763	9.13653	-0.989257	0.28071	-3.52413	0.000424883	0.00143739	SPATA5L1	79029	spermatogenesis associated 5 like 1
ENSG00000137767	59.6244	1.6778	0.108145	15.5144	2.77e-54	4.63e-52	SQOR	58472	sulfide quinone oxidoreductase
ENSG00000255302	5.3777	4.16603	0.497579	8.3726	5.64e-17	9.89e-16	EID1	23741	EP300 interacting inhibitor of differentiation 1
ENSG00000166262	6.04848	1.98021	0.333977	5.92918	3.04e-09	2.39e-08	FAM227B	196951	family with sequence similarity 227 member B
ENSG00000140284	24.4878	-0.932264	0.177612	-5.24888	1.53e-07	9.6e-07	SLC27A2	11001	solute carrier family 27 member 2
ENSG00000137869	10.9807	-0.955963	0.278754	-3.42942	0.000604872	0.00198024	CYP19A1	1588	cytochrome P450 family 19 subfamily A member 1
ENSG00000069966	51.0613	0.76372	0.126192	6.05202	1.43e-09	1.17e-08	GNB5	10681	G protein subunit beta 5
ENSG00000197535	7.26119	1.3012	0.270134	4.81687	1.46e-06	7.88e-06	MYO5A	4644	myosin VA
ENSG00000169856	15.1374	-2.07205	0.250391	-8.27523	1.28e-16	2.17e-15	ONECUT1	3175	one cut homeobox 1
ENSG00000166450	73.1056	-1.13972	0.11058	-10.3068	6.56e-25	2.1e-23	PRTG	283659	protogenin
ENSG00000151575	2.77726	-2.09679	0.622502	-3.36833	0.000756262	0.00242353	TEX9	374618	testis expressed 9
ENSG00000166035	44.0208	1.06405	0.151287	7.03334	2.02e-12	2.28e-11	LIPC	3990	lipase C, hepatic type
ENSG00000128923	89.4654	-0.802592	0.0957415	-8.3829	5.16e-17	9.07e-16	MINDY2	54629	MINDY lysine 48 deubiquitinase 2
ENSG00000157456	240.482	-0.755818	0.067142	-11.257	2.14e-29	8.81e-28	CCNB2	9133	cyclin B2
ENSG00000140297	40.8832	1.90777	0.149639	12.7492	3.15e-37	2.07e-35	GCNT3	9245	glucosaminyl (N-acetyl) transferase 3, mucin type
ENSG00000069667	22.5574	-0.897389	0.214166	-4.19016	2.79e-05	0.000119962	RORA	6095	RAR related orphan receptor A
ENSG00000171914	74.3676	-1.40857	0.106404	-13.238	5.3e-40	3.99e-38	TLN2	83660	talin 2
ENSG00000166831	7.91553	1.71801	0.270774	6.34482	2.23e-10	2.02e-09	RBPMS2	348093	RNA binding protein, mRNA processing factor 2
ENSG00000140451	58.2846	-0.905865	0.124984	-7.24784	4.23e-13	5.1e-12	PIF1	80119	PIF1 5'-to-3' DNA helicase
ENSG00000103647	6.03925	4.69057	0.577046	8.1286	4.34e-16	7.12e-15	CORO2B	10391	coronin 2B
ENSG00000137819	3.85341	1.42516	0.376112	3.78919	0.000151141	0.000563275	PAQR5	54852	progestin and adipoQ receptor family member 5
ENSG00000140332	77.1551	0.787645	0.119854	6.57169	4.97e-11	4.87e-10	TLE3	7090	TLE family member 3, transcriptional corepressor
ENSG00000137868	2.92114	2.28153	0.469125	4.86339	1.15e-06	6.31e-06	STRA6	64220	stimulated by retinoic acid 6
ENSG00000140459	1.42813	2.27674	0.66646	3.41617	0.000635077	0.00207037	CYP11A1	1583	cytochrome P450 family 11 subfamily A member 1
ENSG00000138623	61.0446	0.923213	0.111011	8.31639	9.07e-17	1.57e-15	SEMA7A	8482	semaphorin 7A (John Milton Hagen blood group)
ENSG00000140465	22.3295	2.40522	0.368364	6.52948	6.6e-11	6.36e-10	CYP1A1	1543	cytochrome P450 family 1 subfamily A member 1
ENSG00000140398	18.2809	1.31097	0.181431	7.2257	4.99e-13	5.98e-12	NEIL1	79661	nei like DNA glycosylase 1
ENSG00000140386	68.772	-0.739105	0.0978304	-7.55496	4.19e-14	5.67e-13	SCAPER	49855	S-phase cyclin A associated protein in the ER
ENSG00000167202	35.5099	1.04028	0.131978	7.88219	3.22e-15	4.85e-14	TBC1D2B	23102	TBC1 domain family member 2B
ENSG00000169684	21.5431	-0.796622	0.188509	-4.22591	2.38e-05	0.000103786	CHRNA5	1138	cholinergic receptor nicotinic alpha 5 subunit
ENSG00000172379	3.86804	2.51232	0.50189	5.00571	5.57e-07	3.2e-06	ARNT2	9915	aryl hydrocarbon receptor nuclear translocator 2
ENSG00000103888	149.059	1.89043	0.0796084	23.7466	1.19e-124	1.25e-121	CEMIP	57214	cell migration inducing hyaluronidase 1
ENSG00000103942	18.3823	2.0376	0.202911	10.0418	9.98e-24	2.9e-22	HOMER2	9455	homer scaffold protein 2
ENSG00000166503	1.63586	2.11612	0.605436	3.49521	0.00047369	0.00158898	HDGFL3	50810	HDGF like 3
ENSG00000176371	37.1601	0.833856	0.149823	5.56562	2.61e-08	1.83e-07	ZSCAN2	54993	zinc finger and SCAN domain containing 2
ENSG00000140545	32.4586	1.292	0.164727	7.84328	4.39e-15	6.55e-14	MFGE8	4240	milk fat globule-EGF factor 8 protein
ENSG00000140534	36.4325	-1.04631	0.147411	-7.09792	1.27e-12	1.45e-11	TICRR	90381	TOPBP1 interacting checkpoint and replication regulator
ENSG00000166821	40.4972	-0.940113	0.13729	-6.84766	7.51e-12	7.97e-11	PEX11A	8800	peroxisomal biogenesis factor 11 alpha
ENSG00000185033	12.1802	0.779188	0.208373	3.7394	0.000184463	0.000675982	SEMA4B	10509	semaphorin 4B
ENSG00000140450	11.0827	0.917389	0.248418	3.69293	0.000221687	0.00079866	ARRDC4	91947	arrestin domain containing 4
ENSG00000140479	43.5671	-0.713184	0.132599	-5.37849	7.51e-08	4.92e-07	PCSK6	5046	proprotein convertase subtilisin/kexin type 6
ENSG00000007384	19.1315	0.835606	0.17747	4.70843	2.5e-06	1.3e-05	RHBDF1	64285	rhomboid 5 homolog 1
ENSG00000103260	73.0262	0.72267	0.132749	5.4439	5.21e-08	3.49e-07	METRN	79006	meteorin, glial cell differentiation regulator
ENSG00000102854	1.82076	2.71	0.616969	4.39244	1.12e-05	5.19e-05	MSLN	10232	mesothelin
ENSG00000005513	1.99134	1.92969	0.551709	3.49766	0.000469355	0.00157552	SOX8	30812	SRY-box transcription factor 8
ENSG00000162009	2.94093	1.53937	0.427693	3.59924	0.00031915	0.00111008	SSTR5	6755	somatostatin receptor 5
ENSG00000196557	25.3531	0.948854	0.190407	4.98329	6.25e-07	3.57e-06	CACNA1H	8912	calcium voltage-gated channel subunit alpha1 H
ENSG00000059145	69.7287	-1.2861	0.126041	-10.2039	1.91e-24	5.91e-23	UNKL	64718	unk like zinc finger
ENSG00000103024	15.0139	-0.807674	0.23153	-3.48842	0.000485875	0.00162615	NME3	4832	NME/NM23 nucleoside diphosphate kinase 3
ENSG00000162032	58.667	0.907023	0.102068	8.88645	6.31e-19	1.28e-17	SPSB3	90864	splA/ryanodine receptor domain and SOCS box containing 3
ENSG00000127561	5.43326	1.1417	0.327662	3.4844	0.000493248	0.00164632	SYNGR3	9143	synaptogyrin 3
ENSG00000162078	21.2588	2.86348	0.206119	13.8924	7.05e-44	6.82e-42	ZG16B	124220	zymogen granule protein 16B
ENSG00000172460	1.42961	2.82528	0.679449	4.15818	3.21e-05	0.000136541	PRSS30P	124221	serine protease 30, pseudogene
ENSG00000131650	11.3418	1.27601	0.226851	5.6249	1.86e-08	1.32e-07	KREMEN2	79412	kringle containing transmembrane protein 2
ENSG00000184697	9.23759	-1.59929	0.302945	-5.27914	1.3e-07	8.22e-07	CLDN6	9074	claudin 6
ENSG00000228146	2.6358	1.88176	0.473824	3.97143	7.14e-05	0.000285649	CASP16P	197350	caspase 16, pseudogene
ENSG00000213918	16.9194	0.984859	0.187274	5.25893	1.45e-07	9.11e-07	DNASE1	1773	deoxyribonuclease 1
ENSG00000126603	14.3519	1.20135	0.193377	6.21251	5.21e-10	4.53e-09	GLIS2	84662	GLIS family zinc finger 2
ENSG00000168140	28.819	-0.916281	0.191592	-4.78247	1.73e-06	9.24e-06	VASN	114990	vasorin
ENSG00000118898	17.0473	0.833343	0.202068	4.12407	3.72e-05	0.000156714	PPL	5493	periplakin
ENSG00000213853	145.555	-1.30248	0.112837	-11.5431	8e-31	3.55e-29	EMP2	2013	epithelial membrane protein 2
ENSG00000175643	184.776	-0.907599	0.0874	-10.3844	2.92e-25	9.5e-24	RMI2	116028	RecQ mediated genome instability 2
ENSG00000185338	31.1363	-1.90324	0.301183	-6.3192	2.63e-10	2.36e-09	SOCS1	8651	suppressor of cytokine signaling 1
ENSG00000184602	25.4683	0.771745	0.173532	4.44727	8.7e-06	4.12e-05	SNN	8303	stannin
ENSG00000156968	116.733	-1.15712	0.109947	-10.5243	6.67e-26	2.26e-24	MPV17L	255027	MPV17 mitochondrial inner membrane protein like
ENSG00000166780	5.83168	2.83362	0.371657	7.62429	2.45e-14	3.41e-13	BMERB1	89927	bMERB domain containing 1
ENSG00000103534	1.11409	2.63986	0.755337	3.49494	0.000474174	0.00158988	TMC5	79838	transmembrane channel like 5
ENSG00000174628	8.38151	-1.35042	0.31663	-4.26499	2e-05	8.84e-05	IQCK	124152	IQ motif containing K
ENSG00000183747	3.31557	-1.88104	0.514738	-3.65435	0.000257831	0.000914316	ACSM2A	123876	acyl-CoA synthetase medium chain family member 2A
ENSG00000066813	14.5546	-1.97421	0.268843	-7.34338	2.08e-13	2.6e-12	ACSM2B	348158	acyl-CoA synthetase medium chain family member 2B
ENSG00000005187	16.1732	-0.735764	0.203897	-3.6085	0.000307971	0.00107407	ACSM3	6296	acyl-CoA synthetase medium chain family member 3
ENSG00000103356	49.9839	-0.726678	0.117494	-6.18482	6.22e-10	5.35e-09	EARS2	124454	glutamyl-tRNA synthetase 2, mitochondrial
ENSG00000158865	9.81533	-2.02	0.317206	-6.36809	1.91e-10	1.75e-09	SLC5A11	115584	solute carrier family 5 member 11
ENSG00000169189	115.308	0.921984	0.0916245	10.0626	8.08e-24	2.38e-22	NSMCE1	197370	NSE1 homolog, SMC5-SMC6 complex component
ENSG00000188322	14.4376	2.66058	0.270516	9.83518	7.94e-23	2.2e-21	SBK1	388228	SH3 domain binding kinase 1
ENSG00000197165	160.971	-0.749245	0.100557	-7.45095	9.27e-14	1.21e-12	SULT1A2	6799	sulfotransferase family 1A member 2
ENSG00000168488	47.5439	-0.89068	0.148089	-6.01451	1.8e-09	1.46e-08	ATXN2L	11273	ataxin 2 like
ENSG00000167371	4.65181	1.73251	0.390743	4.43388	9.26e-06	4.35e-05	PRRT2	112476	proline rich transmembrane protein 2
ENSG00000013364	39.2406	2.59133	0.180287	14.3733	7.61e-47	8.42e-45	MVP	9961	major vault protein
ENSG00000149923	43.0226	-1.52249	0.354482	-4.29498	1.75e-05	7.81e-05	PPP4C	5531	protein phosphatase 4 catalytic subunit
ENSG00000090238	8.77642	1.05163	0.247474	4.24946	2.14e-05	9.42e-05	YPEL3	83719	yippee like 3
ENSG00000102886	64.9683	-1.14429	0.118793	-9.63265	5.82e-22	1.49e-20	GDPD3	79153	glycerophosphodiester phosphodiesterase domain containing 3
ENSG00000102882	147.885	-0.926129	0.103751	-8.9265	4.4e-19	9.06e-18	MAPK3	5595	mitogen-activated protein kinase 3
ENSG00000179918	531.376	-0.763831	0.0679018	-11.249	2.34e-29	9.59e-28	SEPHS2	22928	selenophosphate synthetase 2
ENSG00000175938	82.4157	0.943261	0.1095	8.61423	7.04e-18	1.33e-16	ORAI3	93129	ORAI calcium release-activated calcium modulator 3
ENSG00000140682	27.4642	2.14807	0.168885	12.7191	4.63e-37	2.99e-35	TGFB1I1	7041	transforming growth factor beta 1 induced transcript 1
ENSG00000140688	18.9214	0.943344	0.184639	5.10914	3.24e-07	1.93e-06	C16orf58	64755	chromosome 16 open reading frame 58
ENSG00000214617	16.9657	-0.923937	0.215899	-4.27948	1.87e-05	8.33e-05	SLC6A10P	386757	solute carrier family 6 member 10, pseudogene
ENSG00000091651	81.7567	-0.721278	0.120796	-5.97105	2.36e-09	1.89e-08	ORC6	23594	origin recognition complex subunit 6
ENSG00000171208	53.9535	1.48689	0.118525	12.545	4.23e-36	2.5e-34	NETO2	81831	neuropilin and tolloid like 2
ENSG00000177508	509.517	-1.66107	0.0903657	-18.3816	1.84e-75	6.95e-73	IRX3	79191	iroquois homeobox 3
ENSG00000087253	19.2404	-1.92169	0.244137	-7.87137	3.51e-15	5.27e-14	LPCAT2	54947	lysophosphatidylcholine acyltransferase 2
ENSG00000103546	3.55139	-5.08692	0.765032	-6.64928	2.95e-11	2.96e-10	SLC6A2	6530	solute carrier family 6 member 2
ENSG00000228695	45.5361	-2.37134	0.17505	-13.5467	8.29e-42	7.05e-40	CES1P1	51716	carboxylesterase 1 pseudogene 1
ENSG00000198848	50.4662	-3.39977	0.3712	-9.15887	5.24e-20	1.14e-18	CES1	1066	carboxylesterase 1
ENSG00000125148	3378.01	2.87594	0.081463	35.3036	5.17e-273	2.54e-269	MT2A	4502	metallothionein 2A
ENSG00000260549	1.46115	3.87211	0.732527	5.28597	1.25e-07	7.94e-07	MT1L	4500	metallothionein 1L, pseudogene
ENSG00000169715	360.524	2.36118	0.0855982	27.5844	1.71e-167	3.15e-164	MT1E	4493	metallothionein 1E
ENSG00000205362	17.3074	2.32532	0.233198	9.97144	2.03e-23	5.76e-22	MT1A	4489	metallothionein 1A
ENSG00000198417	12.827	-1.64041	0.267287	-6.13724	8.4e-10	7.13e-09	MT1F	4494	metallothionein 1F
ENSG00000125144	15.5156	-1.84331	0.282243	-6.53092	6.54e-11	6.31e-10	MT1G	4495	metallothionein 1G
ENSG00000070915	1.65327	-3.1879	0.849	-3.75488	0.000173423	0.000640471	SLC12A3	6559	solute carrier family 12 member 3
ENSG00000051108	139.201	-1.06311	0.11358	-9.36009	7.97e-21	1.87e-19	HERPUD1	9709	homocysteine inducible ER protein with ubiquitin like domain 1
ENSG00000087237	12.1315	1.11451	0.241919	4.60695	4.09e-06	2.05e-05	CETP	1071	cholesteryl ester transfer protein
ENSG00000140848	17.4749	1.03956	0.219423	4.73769	2.16e-06	1.13e-05	CPNE2	221184	copine 2
ENSG00000102934	270.378	1.22935	0.0782271	15.7151	1.19e-55	2.11e-53	PLLP	51090	plasmolipin
ENSG00000205336	86.831	2.70111	0.278902	9.6848	3.5e-22	9.11e-21	ADGRG1	9289	adhesion G protein-coupled receptor G1
ENSG00000103021	3.23315	2.07775	0.457512	4.5414	5.59e-06	2.75e-05	CCDC113	29070	coiled-coil domain containing 113
ENSG00000181938	33.075	-0.878446	0.147529	-5.9544	2.61e-09	2.07e-08	GINS3	64785	GINS complex subunit 3
ENSG00000166546	1.56553	3.21714	0.709627	4.53356	5.8e-06	2.84e-05	BEAN1	146227	brain expressed associated with NEDD4 1
ENSG00000166548	35.6676	1.48319	0.130244	11.3878	4.81e-30	2.02e-28	TK2	7084	thymidine kinase 2
ENSG00000140931	99.9963	1.12032	0.0936766	11.9595	5.79e-33	2.8e-31	CMTM3	123920	CKLF like MARVEL transmembrane domain containing 3
ENSG00000135720	360.625	0.764879	0.0531763	14.3838	6.54e-47	7.34e-45	DYNC1LI2	1783	dynein cytoplasmic 1 light intermediate chain 2
ENSG00000166589	3.19818	5.07404	0.623556	8.13726	4.04e-16	6.64e-15	CDH16	1014	cadherin 16
ENSG00000166592	2.98749	2.31708	0.512282	4.52305	6.1e-06	2.97e-05	RRAD	6236	RRAD, Ras related glycolysis inhibitor and calcium channel regulator
ENSG00000166595	144.153	0.77404	0.0898923	8.61075	7.26e-18	1.37e-16	CIAO2B	51647	cytosolic iron-sulfur assembly component 2B
ENSG00000067955	130.099	0.735558	0.0683584	10.7603	5.3e-27	1.91e-25	CBFB	865	core-binding factor subunit beta
ENSG00000102871	11.9996	1.00191	0.213848	4.68516	2.8e-06	1.44e-05	TRADD	8717	TNFRSF1A associated via death domain
ENSG00000140939	15.2484	0.923321	0.182276	5.06551	4.07e-07	2.39e-06	NOL3	8996	nucleolar protein 3
ENSG00000196123	14.2281	0.809425	0.19954	4.05645	4.98e-05	0.000205242	KIAA0895L	653319	KIAA0895 like
ENSG00000168701	144.275	0.782636	0.0758908	10.3127	6.18e-25	1.98e-23	TMEM208	29100	transmembrane protein 208
ENSG00000196155	37.4066	1.10363	0.135522	8.14357	3.84e-16	6.33e-15	PLEKHG4	25894	pleckstrin homology and RhoGEF domain containing G4
ENSG00000176387	14.378	-1.29767	0.223129	-5.81581	6.03e-09	4.56e-08	HSD11B2	3291	hydroxysteroid 11-beta dehydrogenase 2
ENSG00000270049	11.4251	0.939938	0.232074	4.05016	5.12e-05	0.000210364	LOC101927837	101927837	uncharacterized LOC101927837
ENSG00000039523	30.8858	0.921958	0.134431	6.8582	6.97e-12	7.43e-11	RIPOR1	79567	RHO family interacting cell polarization regulator 1
ENSG00000102981	17.2505	1.68897	0.198158	8.52333	1.55e-17	2.83e-16	PARD6A	50855	par-6 family cell polarity regulator alpha
ENSG00000124074	39.2962	1.10743	0.144626	7.6572	1.9e-14	2.67e-13	ENKD1	84080	enkurin domain containing 1
ENSG00000159792	88.5744	0.944932	0.0839959	11.2497	2.32e-29	9.54e-28	PSKH1	5681	protein serine kinase H1
ENSG00000039068	37.0921	0.742638	0.147793	5.02487	5.04e-07	2.92e-06	CDH1	999	cadherin 1
ENSG00000141076	55.4579	0.813076	0.148733	5.46668	4.59e-08	3.1e-07	UTP4	84916	UTP4 small subunit processome component
ENSG00000132604	152.861	0.741764	0.0911212	8.14041	3.94e-16	6.49e-15	TERF2	7014	telomeric repeat binding factor 2
ENSG00000090857	143.16	1.06661	0.0857669	12.4361	1.66e-35	9.41e-34	PDPR	55066	pyruvate dehydrogenase phosphatase regulatory subunit
ENSG00000157349	83.769	0.731141	0.101953	7.17139	7.42e-13	8.71e-12	DDX19B	11269	DEAD-box helicase 19B
ENSG00000157350	73.8134	0.865827	0.0907135	9.54464	1.37e-21	3.4e-20	ST3GAL2	6483	ST3 beta-galactoside alpha-2,3-sialyltransferase 2
ENSG00000157368	15.7394	1.00072	0.199667	5.01194	5.39e-07	3.11e-06	IL34	146433	interleukin 34
ENSG00000180917	26.9431	0.877716	0.140351	6.25373	4.01e-10	3.53e-09	CMTR2	55783	cap methyltransferase 2
ENSG00000172137	3.65619	5.47378	0.620082	8.8275	1.07e-18	2.13e-17	CALB2	794	calbindin 2
ENSG00000166747	180.204	0.702996	0.0766702	9.16909	4.77e-20	1.04e-18	AP1G1	164	adaptor related protein complex 1 subunit gamma 1
ENSG00000050820	302.531	1.07558	0.081565	13.1868	1.05e-39	7.73e-38	BCAR1	9564	BCAR1 scaffold protein, Cas family member
ENSG00000205084	7.33356	1.93621	0.312989	6.1862	6.16e-10	5.3e-09	TMEM231	79583	transmembrane protein 231
ENSG00000034713	325.021	1.01303	0.114946	8.81312	1.22e-18	2.42e-17	GABARAPL2	11345	GABA type A receptor associated protein like 2
ENSG00000178573	1.16233	2.96755	0.701281	4.23161	2.32e-05	0.000101476	MAF	4094	MAF bZIP transcription factor
ENSG00000260896	2.47738	2.74241	0.557816	4.91633	8.82e-07	4.92e-06	ARLNC1	100996425	androgen receptor regulated long noncoding RNA 1
ENSG00000086696	17.678	-1.21435	0.203362	-5.97137	2.35e-09	1.88e-08	HSD17B2	3294	hydroxysteroid 17-beta dehydrogenase 2
ENSG00000103150	41.5694	0.806913	0.126868	6.36027	2.01e-10	1.84e-09	MLYCD	23417	malonyl-CoA decarboxylase
ENSG00000140943	83.2543	0.807608	0.0972771	8.30214	1.02e-16	1.76e-15	MBTPS1	8720	membrane bound transcription factor peptidase, site 1
ENSG00000140950	28.8963	0.712384	0.146437	4.86477	1.15e-06	6.27e-06	MEAK7	57707	MTOR associated protein, eak-7 homolog
ENSG00000103187	74.3489	1.66387	0.14413	11.5442	7.9e-31	3.51e-29	COTL1	23406	coactosin like F-actin binding protein 1
ENSG00000153786	379.456	0.937227	0.0761649	12.3052	8.49e-35	4.58e-33	ZDHHC7	55625	zinc finger DHHC-type containing 7
ENSG00000140941	265.679	0.980912	0.0660062	14.8609	5.91e-50	7.83e-48	MAP1LC3B	81631	microtubule associated protein 1 light chain 3 beta
ENSG00000104731	40.9326	0.717771	0.127439	5.63226	1.78e-08	1.27e-07	KLHDC4	54758	kelch domain containing 4
ENSG00000103257	523.332	-1.06068	0.0800633	-13.248	4.63e-40	3.53e-38	SLC7A5	8140	solute carrier family 7 member 5
ENSG00000174990	15.4151	-1.13155	0.210914	-5.365	8.1e-08	5.27e-07	CA5A	763	carbonic anhydrase 5A
ENSG00000051523	21.4768	0.828982	0.187092	4.43089	9.38e-06	4.41e-05	CYBA	1535	cytochrome b-245 alpha chain
ENSG00000167508	122.635	-1.12244	0.156223	-7.18488	6.73e-13	7.92e-12	MVD	4597	mevalonate diphosphate decarboxylase
ENSG00000167523	33.0914	0.720327	0.124021	5.80811	6.32e-09	4.77e-08	SPATA33	124045	spermatogenesis associated 33
ENSG00000003249	55.0955	1.09021	0.177654	6.13669	8.43e-10	7.15e-09	DBNDD1	79007	dysbindin domain containing 1
ENSG00000141013	20.7117	1.23705	0.170151	7.27031	3.59e-13	4.36e-12	GAS8	2622	growth arrest specific 8
ENSG00000181031	11.7026	0.948889	0.206334	4.59881	4.25e-06	2.13e-05	RPH3AL	9501	rabphilin 3A like (without C2 domains)
ENSG00000159842	33.9441	1.08696	0.163341	6.65455	2.84e-11	2.87e-10	ABR	29	ABR activator of RhoGEF and GTPase
ENSG00000167703	175.563	1.24517	0.122158	10.1931	2.13e-24	6.56e-23	SLC43A2	124935	solute carrier family 43 member 2
ENSG00000141258	40.0237	-1.37008	0.143512	-9.5468	1.34e-21	3.34e-20	SGSM2	9905	small G protein signaling modulator 2
ENSG00000132359	30.3963	1.31382	0.141399	9.29158	1.52e-20	3.48e-19	RAP1GAP2	23108	RAP1 GTPase activating protein 2
ENSG00000197417	19.7561	-1.04186	0.187713	-5.5503	2.85e-08	1.99e-07	SHPK	23729	sedoheptulokinase
ENSG00000213977	84.4683	0.905783	0.100268	9.03359	1.66e-19	3.51e-18	TAX1BP3	30851	Tax1 binding protein 3
ENSG00000083454	20.5235	-0.917893	0.197487	-4.64786	3.35e-06	1.71e-05	P2RX5	5026	purinergic receptor P2X 5
ENSG00000108561	48.518	-1.18986	0.200857	-5.92389	3.14e-09	2.47e-08	C1QBP	708	complement C1q binding protein
ENSG00000091592	5.10926	-1.28353	0.388257	-3.30589	0.000946769	0.00297186	NLRP1	22861	NLR family pyrin domain containing 1
ENSG00000179314	5.98499	1.33545	0.351543	3.79883	0.000145381	0.000543462	WSCD1	23302	WSC domain containing 1
ENSG00000141485	181.979	-0.933147	0.109036	-8.55814	1.15e-17	2.13e-16	SLC13A5	284111	solute carrier family 13 member 5
ENSG00000132535	29.2248	1.86583	0.179708	10.3825	2.98e-25	9.67e-24	DLG4	1742	discs large MAGUK scaffold protein 4
ENSG00000181856	12.3285	-0.992786	0.235434	-4.21684	2.48e-05	0.000107729	SLC2A4	6517	solute carrier family 2 member 4
ENSG00000174282	54.028	0.707402	0.11753	6.01893	1.76e-09	1.43e-08	ZBTB4	57659	zinc finger and BTB domain containing 4
ENSG00000007237	6.48148	3.35083	0.375783	8.91693	4.79e-19	9.82e-18	GAS7	8522	growth arrest specific 7
ENSG00000187824	4.83807	-1.78965	0.423128	-4.22958	2.34e-05	0.00010223	TMEM220	388335	transmembrane protein 220
ENSG00000125430	55.4044	-1.1796	0.16098	-7.32763	2.34e-13	2.91e-12	HS3ST3B1	9953	heparan sulfate-glucosamine 3-sulfotransferase 3B1
ENSG00000266709	10.9302	-1.00976	0.274734	-3.6754	0.00023748	0.000851802	MGC12916	84815	uncharacterized protein MGC12916
ENSG00000214941	80.4965	1.12023	0.106565	10.5122	7.59e-26	2.55e-24	ZSWIM7	125150	zinc finger SWIM-type containing 7
ENSG00000187688	31.0942	1.42638	0.136415	10.4562	1.37e-25	4.53e-24	TRPV2	51393	transient receptor potential cation channel subfamily V member 2
ENSG00000108551	32.4182	1.06305	0.199385	5.33166	9.73e-08	6.27e-07	RASD1	51655	ras related dexamethasone induced 1
ENSG00000175662	9.86045	1.16773	0.234625	4.97703	6.46e-07	3.68e-06	TOM1L2	146691	target of myb1 like 2 membrane trafficking protein
ENSG00000141127	31.3134	-0.79279	0.153846	-5.15314	2.56e-07	1.55e-06	PRPSAP2	5636	phosphoribosyl pyrophosphate synthetase associated protein 2
ENSG00000154016	20.8416	2.1246	0.196384	10.8186	2.81e-27	1.03e-25	GRAP	10750	GRB2 related adaptor protein
ENSG00000266079	16.9446	-1.35498	0.214414	-6.31945	2.63e-10	2.36e-09	SNORA59B	677882	small nucleolar RNA, H/ACA box 59B
ENSG00000072210	180.119	-1.06882	0.0910995	-11.7325	8.69e-32	3.96e-30	ALDH3A2	224	aldehyde dehydrogenase 3 family member A2
ENSG00000109072	86.8442	-0.868556	0.159044	-5.46109	4.73e-08	3.19e-07	VTN	7448	vitronectin
ENSG00000109107	48.7625	-1.09767	0.146889	-7.47277	7.85e-14	1.04e-12	ALDOC	230	aldolase, fructose-bisphosphate C
ENSG00000109113	3.68317	1.62716	0.385691	4.21882	2.46e-05	0.000106884	RAB34	83871	RAB34, member RAS oncogene family
ENSG00000173065	97.519	0.859023	0.0933399	9.20316	3.48e-20	7.7e-19	FAM222B	55731	family with sequence similarity 222 member B
ENSG00000168792	24.5341	1.4257	0.154604	9.22162	2.93e-20	6.54e-19	ABHD15	116236	abhydrolase domain containing 15
ENSG00000198720	4.46502	2.05157	0.358723	5.71911	1.07e-08	7.86e-08	ANKRD13B	124930	ankyrin repeat domain 13B
ENSG00000126653	76.8207	0.718707	0.0973951	7.37929	1.59e-13	2.02e-12	NSRP1	84081	nuclear speckle splicing regulatory protein 1
ENSG00000176208	66.0853	-0.922862	0.10947	-8.43027	3.45e-17	6.13e-16	ATAD5	79915	ATPase family AAA domain containing 5
ENSG00000131242	364.543	-1.05305	0.0831061	-12.6712	8.55e-37	5.42e-35	RAB11FIP4	84440	RAB11 family interacting protein 4
ENSG00000166750	3.72587	3.44793	0.525443	6.56194	5.31e-11	5.18e-10	SLFN5	162394	schlafen family member 5
ENSG00000126351	123.474	-1.16563	0.103768	-11.233	2.81e-29	1.14e-27	THRA	7067	thyroid hormone receptor alpha
ENSG00000094804	151.204	-0.80974	0.071822	-11.2743	1.76e-29	7.28e-28	CDC6	990	cell division cycle 6
ENSG00000141753	205.467	2.02547	0.128348	15.781	4.2e-56	7.63e-54	IGFBP4	3487	insulin like growth factor binding protein 4
ENSG00000131746	25.2276	3.27947	0.496662	6.60301	4.03e-11	3.99e-10	TNS4	84951	tensin 4
ENSG00000187242	1.58463	3.72895	0.698716	5.33686	9.46e-08	6.11e-07	KRT12	3859	keratin 12
ENSG00000108244	111.138	1.33294	0.104811	12.7176	4.72e-37	3.03e-35	KRT23	25984	keratin 23
ENSG00000212901	63.7142	1.11154	0.107246	10.3644	3.6e-25	1.16e-23	KRTAP3-1	83896	keratin associated protein 3-1
ENSG00000212724	3.40965	2.71894	0.457685	5.94064	2.84e-09	2.24e-08	KRTAP2-3	730755	keratin associated protein 2-3
ENSG00000171401	1.72844	4.38319	0.666481	6.57661	4.81e-11	4.72e-10	KRT13	3860	keratin 13
ENSG00000171346	1.62467	3.0131	0.696059	4.3288	1.5e-05	6.79e-05	KRT15	3866	keratin 15
ENSG00000171345	1940.78	2.05979	0.165755	12.4267	1.87e-35	1.05e-33	KRT19	3880	keratin 19
ENSG00000173801	230.704	0.793877	0.0751245	10.5675	4.22e-26	1.43e-24	JUP	3728	junction plakoglobin
ENSG00000108771	2.55406	1.72929	0.476519	3.629	0.000284522	0.00100124	DHX58	79132	DExH-box helicase 58
ENSG00000126561	22.0086	-0.774812	0.18108	-4.27883	1.88e-05	8.35e-05	STAT5A	6776	signal transducer and activator of transcription 5A
ENSG00000197291	5.89685	-2.5464	0.456042	-5.58369	2.35e-08	1.66e-07	RAMP2-AS1	100190938	RAMP2 antisense RNA 1
ENSG00000131477	4.09159	-1.43814	0.425278	-3.38164	0.000720536	0.00231864	RAMP2	10266	receptor activity modifying protein 2
ENSG00000188554	346.682	1.1072	0.0789896	14.017	1.23e-44	1.27e-42	NBR1	4077	NBR1 autophagy cargo receptor
ENSG00000175906	54.7794	-1.3091	0.152872	-8.56337	1.1e-17	2.05e-16	ARL4D	379	ADP ribosylation factor like GTPase 4D
ENSG00000161653	6.05996	1.34941	0.316863	4.25866	2.06e-05	9.08e-05	NAGS	162417	N-acetylglutamate synthase
ENSG00000180340	4.03525	1.51997	0.386832	3.92928	8.52e-05	0.000334302	FZD2	2535	frizzled class receptor 2
ENSG00000186185	64.5702	-0.869547	0.226589	-3.83756	0.000124264	0.000469535	KIF18B	146909	kinesin family member 18B
ENSG00000161714	79.4033	1.26164	0.105044	12.0106	3.13e-33	1.55e-31	PLCD3	113026	phospholipase C delta 3
ENSG00000186868	29.5027	-0.818034	0.152658	-5.3586	8.39e-08	5.45e-07	MAPT	4137	microtubule associated protein tau
ENSG00000108379	31.7296	-1.12008	0.183148	-6.11572	9.61e-10	8.08e-09	WNT3	7473	Wnt family member 3
ENSG00000198933	41.4893	-1.02122	0.141712	-7.2063	5.75e-13	6.86e-12	TBKBP1	9755	TBK1 binding protein 1
ENSG00000167183	1.62096	2.26113	0.617911	3.65932	0.000252888	0.000898953	PRR15L	79170	proline rich 15 like
ENSG00000159224	2.24045	2.69188	0.565837	4.75733	1.96e-06	1.03e-05	GIP	2695	gastric inhibitory polypeptide
ENSG00000064300	25.8888	4.24215	0.511164	8.29901	1.05e-16	1.8e-15	NGFR	4804	nerve growth factor receptor
ENSG00000182575	5.11101	1.80727	0.340051	5.31469	1.07e-07	6.84e-07	NXPH3	11248	neurexophilin 3
ENSG00000121104	36.8793	-1.78552	0.164935	-10.8256	2.6e-27	9.62e-26	FAM117A	81558	family with sequence similarity 117 member A
ENSG00000108813	7.62272	-1.82909	0.352034	-5.19577	2.04e-07	1.26e-06	DLX4	1748	distal-less homeobox 4
ENSG00000064195	1.03849	3.32465	0.72677	4.57456	4.77e-06	2.37e-05	DLX3	1747	distal-less homeobox 3
ENSG00000005884	4.20977	2.57265	0.424008	6.06747	1.3e-09	1.07e-08	ITGA3	3675	integrin subunit alpha 3
ENSG00000180891	37.2508	1.06036	0.124304	8.53032	1.46e-17	2.68e-16	CUEDC1	404093	CUE domain containing 1
ENSG00000011143	48.3001	-1.18186	0.136898	-8.63314	5.97e-18	1.13e-16	MKS1	54903	MKS transition zone complex subunit 1
ENSG00000108375	289.107	1.09959	0.0729914	15.0647	2.76e-51	3.95e-49	RNF43	54894	ring finger protein 43
ENSG00000153982	16.6859	1.29359	0.194504	6.65074	2.92e-11	2.93e-10	GDPD1	284161	glycerophosphodiester phosphodiesterase domain containing 1
ENSG00000062716	574.082	0.953108	0.0576557	16.531	2.19e-61	5.29e-59	VMP1	81671	vacuole membrane protein 1
ENSG00000008283	18.2251	-1.11721	0.205125	-5.44649	5.14e-08	3.45e-07	CYB561	1534	cytochrome b561
ENSG00000266402	390.801	-0.920128	0.0998656	-9.21366	3.15e-20	7.03e-19	SNHG25	105376843	small nucleolar RNA host gene 25
ENSG00000108854	97.1757	0.789942	0.0828624	9.53318	1.53e-21	3.78e-20	SMURF2	64750	SMAD specific E3 ubiquitin protein ligase 2
ENSG00000091583	2100.1	-1.87417	0.115363	-16.2459	2.39e-59	5.09e-57	APOH	350	apolipoprotein H
ENSG00000154217	13.2679	1.71628	0.238232	7.20424	5.84e-13	6.94e-12	PITPNC1	26207	phosphatidylinositol transfer protein cytoplasmic 1
ENSG00000154265	23.9931	1.02795	0.157297	6.53512	6.36e-11	6.17e-10	ABCA5	23461	ATP binding cassette subfamily A member 5
ENSG00000108984	26.8192	-1.40149	0.1908	-7.34532	2.05e-13	2.56e-12	MAP2K6	5608	mitogen-activated protein kinase kinase 6
ENSG00000227036	56.1774	1.66465	0.115435	14.4207	3.84e-47	4.37e-45	LINC00511	400619	long intergenic non-protein coding RNA 511
ENSG00000109089	110.176	0.811503	0.151226	5.36616	8.04e-08	5.24e-07	CDR2L	30850	cerebellar degeneration related protein 2 like
ENSG00000170190	2.66501	1.7756	0.489449	3.62775	0.000285904	0.00100562	SLC16A5	9121	solute carrier family 16 member 5
ENSG00000125457	62.5412	1.03124	0.106567	9.67693	3.78e-22	9.78e-21	MIF4GD	57409	MIF4G domain containing
ENSG00000266714	20.3662	2.71435	0.220272	12.3228	6.83e-35	3.72e-33	MYO15B	80022	myosin XVB
ENSG00000259120	3.99875	2.32239	0.391423	5.93319	2.97e-09	2.34e-08	SMIM6	100130933	small integral membrane protein 6
ENSG00000141576	52.4033	1.28027	0.15433	8.29567	1.08e-16	1.85e-15	RNF157	114804	ring finger protein 157
ENSG00000161542	201.861	-0.856179	0.0759448	-11.2737	1.77e-29	7.31e-28	PRPSAP1	5635	phosphoribosyl pyrophosphate synthetase associated protein 1
ENSG00000175931	196.2	-0.712314	0.074726	-9.53235	1.54e-21	3.8e-20	UBE2O	63893	ubiquitin conjugating enzyme E2 O
ENSG00000129667	95.1706	1.55802	0.127747	12.1961	3.26e-34	1.71e-32	RHBDF2	79651	rhomboid 5 homolog 2
ENSG00000161544	207.866	0.741012	0.14511	5.10656	3.28e-07	1.95e-06	CYGB	114757	cytoglobin
ENSG00000182534	98.9874	1.19674	0.0900806	13.2852	2.82e-40	2.16e-38	MXRA7	439921	matrix remodeling associated 7
ENSG00000167889	2.67269	2.5474	0.504981	5.04456	4.55e-07	2.65e-06	MGAT5B	146664	alpha-1,6-mannosylglycoprotein 6-beta-N-acetylglucosaminyltransferase B
ENSG00000204282	12.1161	1.70336	0.23671	7.19596	6.2e-13	7.34e-12	TNRC6C-AS1	100131096	TNRC6C antisense RNA 1
ENSG00000183077	137.187	-0.942579	0.0872036	-10.809	3.12e-27	1.14e-25	AFMID	125061	arylformamidase
ENSG00000089685	455.615	-0.758728	0.0543013	-13.9725	2.29e-44	2.29e-42	BIRC5	332	baculoviral IAP repeat containing 5
ENSG00000187775	3.29461	2.44407	0.442085	5.52851	3.23e-08	2.24e-07	DNAH17	8632	dynein axonemal heavy chain 17
ENSG00000267123	1.76486	3.18112	0.654906	4.85736	1.19e-06	6.5e-06	SCAT1	101928710	S-phase cancer associated transcript 1
ENSG00000035862	211.029	1.54327	0.128496	12.0102	3.14e-33	1.55e-31	TIMP2	7077	TIMP metallopeptidase inhibitor 2
ENSG00000185813	115.731	-0.922943	0.107868	-8.55623	1.17e-17	2.16e-16	PCYT2	5833	phosphate cytidylyltransferase 2, ethanolamine
ENSG00000169750	16.3879	-1.18457	0.203476	-5.82164	5.83e-09	4.41e-08	RAC3	5881	Rac family small GTPase 3
ENSG00000169710	1041.25	-1.03211	0.0841665	-12.2627	1.44e-34	7.63e-33	FASN	2194	fatty acid synthase
ENSG00000173762	11.918	-1.13667	0.248277	-4.57822	4.69e-06	2.33e-05	CD7	924	CD7 molecule
ENSG00000141542	17.1883	1.7392	0.197632	8.80019	1.37e-18	2.7e-17	RAB40B	10966	RAB40B, member RAS oncogene family
ENSG00000176845	10.7178	2.52404	0.25502	9.8974	4.27e-23	1.2e-21	METRNL	284207	meteorin like, glial cell differentiation regulator
ENSG00000176912	259.249	-0.832883	0.0620832	-13.4156	4.9e-41	3.96e-39	TYMSOS	494514	TYMS opposite strand
ENSG00000132199	35.9046	-1.11847	0.148004	-7.55705	4.12e-14	5.59e-13	ENOSF1	55556	enolase superfamily member 1
ENSG00000101605	8.26545	0.837474	0.243843	3.43448	0.000593684	0.00194665	MYOM1	8736	myomesin 1
ENSG00000265933	1.61614	-2.74283	0.823736	-3.32974	0.000869269	0.0027515	LINC00668	400643	long intergenic non-protein coding RNA 668
ENSG00000168502	14.3977	1.35267	0.272	4.97307	6.59e-07	3.75e-06	MTCL1	23255	microtubule crosslinking factor 1
ENSG00000178127	12.8714	0.929925	0.20979	4.43265	9.31e-06	4.38e-05	NDUFV2	4729	NADH:ubiquinone oxidoreductase core subunit V2
ENSG00000128791	12.8202	0.757827	0.216183	3.5055	0.000455758	0.00153513	TWSG1	57045	twisted gastrulation BMP signaling modulator 1
ENSG00000168461	13.2912	2.6753	0.276936	9.66036	4.44e-22	1.15e-20	RAB31	11031	RAB31, member RAS oncogene family
ENSG00000154856	1.31786	2.65709	0.689102	3.85587	0.000115317	0.00043934	APCDD1	147495	APC down-regulated 1
ENSG00000154864	467.511	1.01353	0.0804079	12.6049	1.98e-36	1.2e-34	PIEZO2	63895	piezo type mechanosensitive ion channel component 2
ENSG00000141401	90.9635	-1.11855	0.114557	-9.76412	1.61e-22	4.36e-21	IMPA2	3613	inositol monophosphatase 2
ENSG00000176014	139.065	1.07225	0.0767634	13.9682	2.44e-44	2.4e-42	TUBB6	84617	tubulin beta 6 class V
ENSG00000141391	5.51437	-1.37355	0.379375	-3.62057	0.000293955	0.00103024	PRELID3A	10650	PRELI domain containing 3A
ENSG00000141449	3.8458	-1.73712	0.454186	-3.82469	0.000130937	0.000493606	GREB1L	80000	GREB1 like retinoic acid receptor coactivator
ENSG00000266010	2.74618	2.7659	0.509774	5.42574	5.77e-08	3.83e-07	GATA6-AS1	100128893	GATA6 antisense RNA 1 (head to head)
ENSG00000141448	12.3371	1.29809	0.217727	5.96199	2.49e-09	1.99e-08	GATA6	2627	GATA binding protein 6
ENSG00000170558	222.557	1.95924	0.191403	10.2362	1.36e-24	4.3e-23	CDH2	1000	cadherin 2
ENSG00000118271	254.66	1.11822	0.112957	9.89958	4.18e-23	1.18e-21	TTR	7276	transthyretin
ENSG00000141441	6.36652	1.08731	0.297409	3.65596	0.000256226	0.00090972	GAREM1	64762	GRB2 associated regulator of MAPK1 subtype 1
ENSG00000197705	25.9635	0.828876	0.159269	5.20426	1.95e-07	1.2e-06	KLHL14	57565	kelch like family member 14
ENSG00000186812	16.1154	0.779397	0.191237	4.07555	4.59e-05	0.00019049	ZNF397	84307	zinc finger protein 397
ENSG00000101670	1.56762	-3.50155	0.81278	-4.30812	1.65e-05	7.4e-05	LIPG	9388	lipase G, endothelial type
ENSG00000167315	130.276	-0.704664	0.0915821	-7.69434	1.42e-14	2.02e-13	ACAA2	10449	acetyl-CoA acyltransferase 2
ENSG00000119547	57.943	-1.74559	0.127951	-13.6427	2.23e-42	1.95e-40	ONECUT2	9480	one cut homeobox 2
ENSG00000066926	32.1788	-1.43583	0.165935	-8.65299	5.02e-18	9.57e-17	FECH	2235	ferrochelatase
ENSG00000081923	11.6715	-2.4014	0.316869	-7.57854	3.49e-14	4.76e-13	ATP8B1	5205	ATPase phospholipid transporting 8B1
ENSG00000141682	15.4111	0.8323	0.214361	3.8827	0.000103305	0.000398741	PMAIP1	5366	phorbol-12-myristate-13-acetate-induced protein 1
ENSG00000141655	13.7021	-1.34931	0.230788	-5.84654	5.02e-09	3.83e-08	TNFRSF11A	8792	TNF receptor superfamily member 11a
ENSG00000141664	135.028	-1.99627	0.101226	-19.721	1.42e-86	8.38e-84	ZCCHC2	54877	zinc finger CCHC-type containing 2
ENSG00000166401	4.77445	2.17964	0.355656	6.12851	8.87e-10	7.5e-09	SERPINB8	5271	serpin family B member 8
ENSG00000150636	7.01742	1.15859	0.284635	4.07044	4.69e-05	0.00019439	CCDC102B	79839	coiled-coil domain containing 102B
ENSG00000206052	181.188	0.859645	0.0836985	10.2707	9.55e-25	3.03e-23	DOK6	220164	docking protein 6
ENSG00000225377	8.35517	0.863629	0.240859	3.58561	0.000336287	0.00116528	NRSN2-AS1	100507459	NRSN2 antisense RNA 1
ENSG00000125895	25.2385	0.810221	0.16581	4.88645	1.03e-06	5.66e-06	TMEM74B	55321	transmembrane protein 74B
ENSG00000234684	9.91075	1.19124	0.248806	4.78783	1.69e-06	9.02e-06	SDCBP2-AS1	100507495	SDCBP2 antisense RNA 1
ENSG00000198053	13.0776	2.10891	0.220331	9.57158	1.05e-21	2.66e-20	SIRPA	140885	signal regulatory protein alpha
ENSG00000088836	135.167	1.31744	0.0771554	17.0751	2.27e-65	6.08e-63	SLC4A11	83959	solute carrier family 4 member 11
ENSG00000088826	67.4713	1.20777	0.129513	9.32546	1.1e-20	2.56e-19	SMOX	54498	spermine oxidase
ENSG00000101265	2.83597	2.80322	0.509166	5.50552	3.68e-08	2.52e-07	RASSF2	9770	Ras association domain family member 2
ENSG00000125772	70.9515	1.65604	0.137483	12.0454	2.05e-33	1.03e-31	GPCPD1	56261	glycerophosphocholine phosphodiesterase 1
ENSG00000101384	187.149	0.77399	0.0763792	10.1335	3.92e-24	1.18e-22	JAG1	182	jagged canonical Notch ligand 1
ENSG00000172296	31.3179	-1.96112	0.173081	-11.3307	9.25e-30	3.88e-28	SPTLC3	55304	serine palmitoyltransferase long chain base subunit 3
ENSG00000125848	38.2888	3.21767	0.167705	19.1865	4.8e-82	2.28e-79	FLRT3	23767	fibronectin leucine rich transmembrane protein 3
ENSG00000125868	1020.17	0.783847	0.0512739	15.2874	9.27e-53	1.42e-50	DSTN	11034	destrin, actin depolymerizing factor
ENSG00000125821	176.732	-1.60226	0.206087	-7.77468	7.56e-15	1.1e-13	DTD1	92675	D-aminoacyl-tRNA deacylase 1
ENSG00000259974	167.233	-1.58119	0.200581	-7.88303	3.2e-15	4.82e-14	LINC00261	140828	long intergenic non-protein coding RNA 261
ENSG00000125810	2.26311	3.58505	0.67555	5.30686	1.12e-07	7.12e-07	CD93	22918	CD93 molecule
ENSG00000154930	69.5187	1.60161	0.110534	14.4898	1.41e-47	1.69e-45	ACSS1	84532	acyl-CoA synthetase short chain family member 1
ENSG00000101003	100.553	-0.719801	0.0941808	-7.64275	2.13e-14	2.98e-13	GINS1	9837	GINS complex subunit 1
ENSG00000088305	36.0887	-2.02778	0.186222	-10.889	1.3e-27	4.87e-26	DNMT3B	1789	DNA methyltransferase 3 beta
ENSG00000101400	50.3508	-1.50044	0.144376	-10.3925	2.68e-25	8.76e-24	SNTA1	6640	syntrophin alpha 1
ENSG00000131069	34.4036	-0.721981	0.14934	-4.83447	1.34e-06	7.25e-06	ACSS2	55902	acyl-CoA synthetase short chain family member 2
ENSG00000088367	191.719	1.85967	0.137565	13.5184	1.22e-41	1.02e-39	EPB41L1	2036	erythrocyte membrane protein band 4.1 like 1
ENSG00000080845	180.72	0.845234	0.0865487	9.76599	1.58e-22	4.28e-21	DLGAP4	22839	DLG associated protein 4
ENSG00000118707	169.009	-0.859063	0.121702	-7.05872	1.68e-12	1.92e-11	TGIF2	60436	TGFB induced factor homeobox 2
ENSG00000101342	2.41564	2.5086	0.54007	4.64496	3.4e-06	1.73e-05	TLDC2	140711	TBC/LysM-associated domain containing 2
ENSG00000101413	58.116	-0.851656	0.115532	-7.3716	1.69e-13	2.13e-12	RPRD1B	58490	regulation of nuclear pre-mRNA domain containing 1B
ENSG00000198959	85.5649	1.89938	0.131485	14.4455	2.67e-47	3.1e-45	TGM2	7052	transglutaminase 2
ENSG00000124143	4.28625	3.64813	0.501438	7.27534	3.46e-13	4.21e-12	ARHGAP40	343578	Rho GTPase activating protein 40
ENSG00000101447	122.084	-0.745748	0.100365	-7.43039	1.08e-13	1.4e-12	FAM83D	81610	family with sequence similarity 83 member D
ENSG00000101049	35.1077	0.93588	0.136384	6.8621	6.79e-12	7.23e-11	SGK2	10110	serum/glucocorticoid regulated kinase 2
ENSG00000101057	327.745	-0.705904	0.120886	-5.8394	5.24e-09	3.99e-08	MYBL2	4605	MYB proto-oncogene like 2
ENSG00000025772	347.283	1.15383	0.0782009	14.7547	2.87e-49	3.64e-47	TOMM34	10953	translocase of outer mitochondrial membrane 34
ENSG00000175063	191.265	-1.14666	0.0976671	-11.7405	7.9e-32	3.61e-30	UBE2C	11065	ubiquitin conjugating enzyme E2 C
ENSG00000100979	17.8087	-1.00703	0.225098	-4.47375	7.69e-06	3.68e-05	PLTP	5360	phospholipid transfer protein
ENSG00000100982	9.20441	-1.17573	0.26706	-4.40249	1.07e-05	4.98e-05	PCIF1	63935	PDX1 C-terminal inhibiting factor 1
ENSG00000124160	55.9854	-0.737968	0.130146	-5.6703	1.43e-08	1.04e-07	NCOA5	57727	nuclear receptor coactivator 5
ENSG00000124151	241.044	-1.75557	0.0817296	-21.4803	2.38e-102	1.75e-99	NCOA3	8202	nuclear receptor coactivator 3
ENSG00000196562	38.3411	-1.10734	0.17202	-6.43726	1.22e-10	1.14e-09	SULF2	55959	sulfatase 2
ENSG00000124201	126.415	0.76662	0.103798	7.38568	1.52e-13	1.93e-12	ZNFX1	57169	zinc finger NFX1-type containing 1
ENSG00000197818	20.2636	0.710595	0.196656	3.61339	0.000302223	0.0010562	SLC9A8	23315	solute carrier family 9 member A8
ENSG00000172216	223.558	-0.742734	0.113181	-6.56238	5.3e-11	5.17e-10	CEBPB	1051	CCAAT enhancer binding protein beta
ENSG00000101096	70.8251	-2.06281	0.133238	-15.4821	4.58e-54	7.41e-52	NFATC2	4773	nuclear factor of activated T cells 2
ENSG00000101115	2.14453	-3.57152	0.794622	-4.49461	6.97e-06	3.37e-05	SALL4	57167	spalt like transcription factor 4
ENSG00000171940	52.6404	-0.788116	0.111986	-7.03763	1.96e-12	2.21e-11	ZNF217	7764	zinc finger protein 217
ENSG00000064787	35.785	-0.789878	0.155027	-5.09511	3.49e-07	2.06e-06	BCAS1	8537	breast carcinoma amplified sequence 1
ENSG00000124253	5.36698	-2.07555	0.473615	-4.38236	1.17e-05	5.42e-05	PCK1	5105	phosphoenolpyruvate carboxykinase 1
ENSG00000124225	8.8854	4.93757	0.607587	8.12653	4.42e-16	7.23e-15	PMEPA1	56937	prostate transmembrane protein, androgen induced 1
ENSG00000101162	15.0879	-1.58763	0.275174	-5.76954	7.95e-09	5.93e-08	TUBB1	81027	tubulin beta 1 class VI
ENSG00000130701	6.40216	2.43926	0.334947	7.28254	3.28e-13	4.01e-12	RBBP8NL	140893	RBBP8 N-terminal like
ENSG00000101187	103.08	1.99808	0.0969429	20.6109	2.19e-94	1.47e-91	SLCO4A1	28231	solute carrier organic anion transporter family member 4A1
ENSG00000228705	4.63962	4.27229	0.573592	7.44831	9.45e-14	1.23e-12	LINC00659	100652730	long intergenic non-protein coding RNA 659
ENSG00000101197	18.3102	4.26686	0.3402	12.5422	4.38e-36	2.57e-34	BIRC7	79444	baculoviral IAP repeat containing 7
ENSG00000101210	4.07811	1.60063	0.390779	4.096	4.2e-05	0.000175562	EEF1A2	1917	eukaryotic translation elongation factor 1 alpha 2
ENSG00000197457	28.2183	-1.83807	0.189812	-9.68365	3.54e-22	9.19e-21	STMN3	50861	stathmin 3
ENSG00000125520	707.372	-0.864563	0.0825824	-10.4691	1.2e-25	3.99e-24	SLC2A4RG	56731	SLC2A4 regulator
ENSG00000130584	18.4248	1.55375	0.195201	7.95972	1.72e-15	2.67e-14	ZBTB46	140685	zinc finger and BTB domain containing 46
ENSG00000099812	6.23981	1.8817	0.317509	5.92645	3.1e-09	2.43e-08	MISP	126353	mitotic spindle positioning
ENSG00000197766	22.2813	-1.61201	0.200663	-8.03339	9.48e-16	1.5e-14	CFD	1675	complement factor D
ENSG00000116014	147.021	-2.18646	0.1269	-17.2298	1.59e-66	4.49e-64	KISS1R	84634	KISS1 receptor
ENSG00000064687	16.0806	-1.31231	0.217165	-6.04289	1.51e-09	1.24e-08	ABCA7	10347	ATP binding cassette subfamily A member 7
ENSG00000180448	24.3588	-1.78912	0.232167	-7.70618	1.3e-14	1.85e-13	ARHGAP45	23526	Rho GTPase activating protein 45
ENSG00000115255	21.5306	0.917705	0.177842	5.16023	2.47e-07	1.5e-06	REEP6	92840	receptor accessory protein 6
ENSG00000205922	1.04864	3.05774	0.787379	3.88344	0.00010299	0.000397734	ONECUT3	390874	one cut homeobox 3
ENSG00000130270	7.49957	0.878164	0.26434	3.3221	0.000893414	0.00282004	ATP8B3	148229	ATPase phospholipid transporting 8B3
ENSG00000172006	12.1245	0.883093	0.210294	4.19932	2.68e-05	0.000115762	ZNF554	115196	zinc finger protein 554
ENSG00000105289	3.02944	-2.08431	0.560392	-3.71939	0.000199705	0.000726139	TJP3	27134	tight junction protein 3
ENSG00000167664	1.5338	2.9264	0.667042	4.38713	1.15e-05	5.31e-05	TMIGD2	126259	transmembrane and immunoglobulin domain containing 2
ENSG00000171119	5.78667	-1.72933	0.414209	-4.17501	2.98e-05	0.000127496	NRTN	4902	neurturin
ENSG00000105519	5.47017	1.43782	0.325398	4.41865	9.93e-06	4.64e-05	CAPS	828	calcyphosine
ENSG00000181240	3.37844	-1.90942	0.562695	-3.39334	0.000690451	0.00223062	SLC25A41	284427	solute carrier family 25 member 41
ENSG00000125735	4.42112	1.78807	0.373525	4.78702	1.69e-06	9.05e-06	TNFSF14	8740	TNF superfamily member 14
ENSG00000178531	3.96255	1.42723	0.376156	3.79426	0.000148085	0.000553148	CTXN1	404217	cortexin 1
ENSG00000167772	17.9042	-1.75048	0.272833	-6.41596	1.4e-10	1.31e-09	ANGPTL4	51129	angiopoietin like 4
ENSG00000099785	5.91045	1.15931	0.340139	3.40834	0.000653589	0.00212267	MARCHF2	51257	membrane associated ring-CH-type finger 2
ENSG00000133250	22.0045	-0.789869	0.174303	-4.53158	5.85e-06	2.87e-05	ZNF414	84330	zinc finger protein 414
ENSG00000129354	57.7129	-3.00497	0.188238	-15.9637	2.29e-57	4.32e-55	AP1M2	10053	adaptor related protein complex 1 subunit mu 2
ENSG00000267100	128.426	0.779022	0.0807018	9.65309	4.77e-22	1.23e-20	ILF3-DT	147727	ILF3 divergent transcript
ENSG00000213339	43.0023	-1.44048	0.186145	-7.73845	1.01e-14	1.45e-13	QTRT1	81890	queuine tRNA-ribosyltransferase catalytic subunit 1
ENSG00000130733	21.9095	1.0303	0.191467	5.38107	7.4e-08	4.85e-07	YIPF2	78992	Yip1 domain family member 2
ENSG00000130176	9.56455	0.793424	0.233996	3.39076	0.000696992	0.00224977	CNN1	1264	calponin 1
ENSG00000188868	26.6374	-0.87468	0.165412	-5.28787	1.24e-07	7.86e-07	ZNF563	147837	zinc finger protein 563
ENSG00000171223	5.09829	1.78327	0.385557	4.62518	3.74e-06	1.89e-05	JUNB	3726	JunB proto-oncogene, AP-1 transcription factor subunit
ENSG00000160888	543.623	1.03577	0.0647159	16.005	1.18e-57	2.28e-55	IER2	9592	immediate early response 2
ENSG00000123146	30.1009	0.90731	0.154088	5.88824	3.9e-09	3.02e-08	ADGRE5	976	adhesion G protein-coupled receptor E5
ENSG00000132002	1039.13	0.892961	0.093708	9.52919	1.59e-21	3.9e-20	DNAJB1	3337	DnaJ heat shock protein family (Hsp40) member B1
ENSG00000105137	43.4503	0.806899	0.121465	6.64305	3.07e-11	3.08e-10	SYDE1	85360	synapse defective Rho GTPase homolog 1
ENSG00000186529	22.6808	-2.12631	0.211934	-10.0329	1.09e-23	3.16e-22	CYP4F3	4051	cytochrome P450 family 4 subfamily F member 3
ENSG00000186204	31.7634	-1.73062	0.187541	-9.22798	2.76e-20	6.2e-19	CYP4F12	66002	cytochrome P450 family 4 subfamily F member 12
ENSG00000186115	8.59085	-1.20082	0.299972	-4.00312	6.25e-05	0.000252977	CYP4F2	8529	cytochrome P450 family 4 subfamily F member 2
ENSG00000074855	14.214	0.94573	0.206113	4.5884	4.47e-06	2.23e-05	ANO8	57719	anoctamin 8
ENSG00000130299	89.7856	-0.834116	0.10265	-8.12586	4.44e-16	7.27e-15	GTPBP3	84705	GTP binding protein 3, mitochondrial
ENSG00000188051	9.14246	-1.46043	0.295936	-4.93495	8.02e-07	4.5e-06	TMEM221	100130519	transmembrane protein 221
ENSG00000130304	22.558	1.11511	0.159268	7.00148	2.53e-12	2.82e-11	SLC27A1	376497	solute carrier family 27 member 1
ENSG00000179913	7.17183	2.71119	0.318008	8.52556	1.52e-17	2.78e-16	B3GNT3	10331	UDP-GlcNAc:betaGal beta-1,3-N-acetylglucosaminyltransferase 3
ENSG00000105639	17.551	1.07371	0.172455	6.22603	4.78e-10	4.18e-09	JAK3	3718	Janus kinase 3
ENSG00000105650	7.34953	1.04252	0.263318	3.95917	7.52e-05	0.000298629	PDE4C	5143	phosphodiesterase 4C
ENSG00000130513	2624.66	1.44005	0.0610828	23.5753	6.91e-123	6.77e-120	GDF15	9518	growth differentiation factor 15
ENSG00000105696	85.7538	1.57937	0.332459	4.75056	2.03e-06	1.07e-05	TMEM59L	25789	transmembrane protein 59 like
ENSG00000105664	2.90774	2.81558	0.567542	4.96101	7.01e-07	3.97e-06	COMP	1311	cartilage oligomeric matrix protein
ENSG00000223802	20.1316	-0.974743	0.192079	-5.07471	3.88e-07	2.29e-06	CERS1	10715	ceramide synthase 1
ENSG00000256771	12.9994	-0.891536	0.266613	-3.34393	0.000826018	0.00262474	ZNF253	56242	zinc finger protein 253
ENSG00000160352	70.985	-0.84716	0.116739	-7.25688	3.96e-13	4.79e-12	ZNF714	148206	zinc finger protein 714
ENSG00000213965	9.30355	1.69668	0.251582	6.74402	1.54e-11	1.59e-10	NUDT19	390916	nudix hydrolase 19
ENSG00000089351	190.55	0.713457	0.0735358	9.70218	2.95e-22	7.79e-21	GRAMD1A	57655	GRAM domain containing 1A
ENSG00000105711	20.4516	1.54034	0.169988	9.06145	1.29e-19	2.73e-18	SCN1B	6324	sodium voltage-gated channel beta subunit 1
ENSG00000105697	301.261	-1.8304	0.133267	-13.7349	6.28e-43	5.77e-41	HAMP	57817	hepcidin antimicrobial peptide
ENSG00000161249	33.6724	-3.89027	0.281339	-13.8277	1.74e-43	1.65e-41	DMKN	93099	dermokine
ENSG00000250799	34.3591	-0.719745	0.14156	-5.08438	3.69e-07	2.18e-06	PRODH2	58510	proline dehydrogenase 2
ENSG00000126264	3.20469	3.16576	0.554069	5.71365	1.11e-08	8.11e-08	HCST	10870	hematopoietic cell signal transducer
ENSG00000161277	6.52662	1.20075	0.31365	3.8283	0.000129033	0.000486805	THAP8	199745	THAP domain containing 8
ENSG00000232677	3.15471	-2.77065	0.690401	-4.0131	5.99e-05	0.000243785	LINC00665	100506930	long intergenic non-protein coding RNA 665
ENSG00000142065	16.9817	-0.847078	0.200401	-4.22692	2.37e-05	0.000103352	ZFP14	57677	ZFP14 zinc finger protein
ENSG00000196967	7.29709	0.937688	0.278406	3.36805	0.000757011	0.0024254	ZNF585A	199704	zinc finger protein 585A
ENSG00000011332	9.33427	-1.7056	0.313404	-5.44218	5.26e-08	3.52e-07	DPF1	8193	double PHD fingers 1
ENSG00000167644	4.78538	2.04236	0.372858	5.47757	4.31e-08	2.92e-07	C19orf33	64073	chromosome 19 open reading frame 33
ENSG00000104823	141.273	-1.1029	0.0931586	-11.839	2.45e-32	1.14e-30	ECH1	1891	enoyl-CoA hydratase 1
ENSG00000187994	20.2756	1.43397	0.184019	7.79252	6.57e-15	9.63e-14	RINL	126432	Ras and Rab interactor like
ENSG00000130755	4.47532	2.08159	0.412926	5.04106	4.63e-07	2.69e-06	GMFG	9535	glia maturation factor gamma
ENSG00000176401	9.21419	1.19228	0.267413	4.45859	8.25e-06	3.93e-05	EID2B	126272	EP300 interacting inhibitor of differentiation 2B
ENSG00000105219	3.15391	1.52696	0.411499	3.71073	0.000206665	0.000748581	CNTD2	79935	cyclin N-terminal domain containing 2
ENSG00000105227	6.99989	-1.12784	0.315478	-3.57501	0.00035021	0.00120924	PRX	57716	periaxin
ENSG00000197019	43.0917	0.849033	0.115746	7.3353	2.21e-13	2.75e-12	SERTAD1	29950	SERTA domain containing 1
ENSG00000105245	10.0931	1.07137	0.243351	4.40258	1.07e-05	4.98e-05	NUMBL	9253	NUMB like endocytic adaptor protein
ENSG00000167600	14.5361	2.54313	0.237778	10.6954	1.07e-26	3.8e-25	CYP2S1	29785	cytochrome P450 family 2 subfamily S member 1
ENSG00000167601	20.0856	3.94574	0.265594	14.8563	6.34e-50	8.32e-48	AXL	558	AXL receptor tyrosine kinase
ENSG00000105767	32.1125	0.995475	0.187543	5.30798	1.11e-07	7.08e-07	CADM4	199731	cell adhesion molecule 4
ENSG00000011422	19.9702	1.26196	0.200752	6.28616	3.25e-10	2.89e-09	PLAUR	5329	plasminogen activator, urokinase receptor
ENSG00000007255	38.2089	1.00474	0.145532	6.90392	5.06e-12	5.49e-11	TRAPPC6A	79090	trafficking protein particle complex 6A
ENSG00000104879	4.68883	1.5186	0.337858	4.49479	6.96e-06	3.37e-05	CKM	1158	creatine kinase, M-type
ENSG00000104884	44.755	-0.816387	0.123666	-6.60154	4.07e-11	4.02e-10	ERCC2	2068	ERCC excision repair 2, TFIIH core complex helicase subunit
ENSG00000012061	24.7121	1.03603	0.172887	5.99253	2.07e-09	1.67e-08	ERCC1	2067	ERCC excision repair 1, endonuclease non-catalytic subunit
ENSG00000125753	277.751	0.942572	0.0706669	13.3382	1.39e-40	1.07e-38	VASP	7408	vasodilator stimulated phosphoprotein
ENSG00000011478	7.90795	-1.49603	0.354737	-4.21731	2.47e-05	0.000107538	QPCTL	54814	glutaminyl-peptide cyclotransferase like
ENSG00000204869	7.88738	4.77371	0.497037	9.60433	7.67e-22	1.95e-20	IGFL4	444882	IGF like family member 4
ENSG00000181027	9.88588	-1.97487	0.320431	-6.16319	7.13e-10	6.1e-09	FKRP	79147	fukutin related protein
ENSG00000130751	5.83532	-1.61186	0.371826	-4.335	1.46e-05	6.62e-05	NPAS1	4861	neuronal PAS domain protein 1
ENSG00000257704	9.20307	0.894791	0.233988	3.82409	0.000131257	0.000494688	INAFM1	255783	InaF motif containing 1
ENSG00000105419	1.68886	3.06572	0.692823	4.42497	9.65e-06	4.52e-05	MEIS3	56917	Meis homeobox 3
ENSG00000105398	165.34	-1.23364	0.20467	-6.02745	1.67e-09	1.36e-08	SULT2A1	6822	sulfotransferase family 2A member 1
ENSG00000178150	10.9122	-0.804483	0.235991	-3.40896	0.000652105	0.00211837	ZNF114	163071	zinc finger protein 114
ENSG00000105464	8.48001	2.07531	0.344721	6.02026	1.74e-09	1.42e-08	GRIN2D	2906	glutamate ionotropic receptor NMDA type subunit 2D
ENSG00000176909	24.58	1.10261	0.184161	5.98717	2.14e-09	1.72e-08	MAMSTR	284358	MEF2 activating motif and SAP domain containing transcriptional regulator
ENSG00000087086	5692.61	-0.804604	0.064559	-12.4631	1.19e-35	6.77e-34	FTL	2512	ferritin light chain
ENSG00000130529	9.04387	1.25683	0.242605	5.18055	2.21e-07	1.36e-06	TRPM4	54795	transient receptor potential cation channel subfamily M member 4
ENSG00000074219	130.916	0.748819	0.0760264	9.84947	6.89e-23	1.91e-21	TEAD2	8463	TEA domain transcription factor 2
ENSG00000204673	48.0245	1.12257	0.15518	7.23398	4.69e-13	5.64e-12	AKT1S1	84335	AKT1 substrate 1
ENSG00000131408	28.115	0.721046	0.155765	4.62905	3.67e-06	1.86e-05	NR1H2	7376	nuclear receptor subfamily 1 group H member 2
ENSG00000167747	55.4472	-1.0742	0.12552	-8.55798	1.15e-17	2.13e-16	C19orf48	84798	chromosome 19 open reading frame 48
ENSG00000167755	3.8648	5.10695	0.666906	7.65768	1.89e-14	2.66e-13	KLK6	5653	kallikrein related peptidase 6
ENSG00000142549	1.24935	-3.5717	0.934945	-3.82022	0.000133333	0.000501353	IGLON5	402665	IgLON family member 5
ENSG00000160318	6.69049	1.54202	0.284309	5.42376	5.84e-08	3.87e-07	CLDND2	125875	claudin domain containing 2
ENSG00000105370	6.49593	3.07299	0.386882	7.94298	1.97e-15	3.03e-14	LIM2	3982	lens intrinsic membrane protein 2
ENSG00000161551	6.20175	-1.42489	0.343756	-4.14507	3.4e-05	0.000144055	ZNF577	84765	zinc finger protein 577
ENSG00000197619	10.4591	0.842364	0.241515	3.48784	0.000486948	0.00162937	ZNF615	284370	zinc finger protein 615
ENSG00000269834	9.62226	1.1431	0.249186	4.58734	4.49e-06	2.24e-05	ZNF528-AS1	102724105	ZNF528 antisense RNA 1
ENSG00000130844	48.5855	-0.887622	0.132357	-6.70625	2e-11	2.04e-10	ZNF331	55422	zinc finger protein 331
[truncated: 83 more rows]
